# Supplementary material
Source: PubMed Central journal article supplement (PMC2929927)

## **Synthesis of the bis-tetrahydropyran Core of Amphidinol 3**

Michael T. Crimmins\*, Timothy J. Martin, Theodore A. Martinot  
*Kenan and Caudill Laboratories of Chemistry, University of North Carolina at  
Chapel Hill, North Carolina 27599*

*crimmins@email.unc.edu*

**Supporting Information:  $^1\text{H}$  and  $^{13}\text{C}$  spectra**

$^1\text{H}$  NMR (400 MHz) of allylic alcohol **7** (in  $\text{CDCl}_3$ )

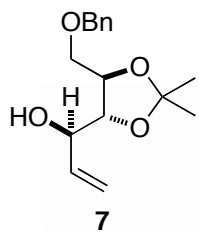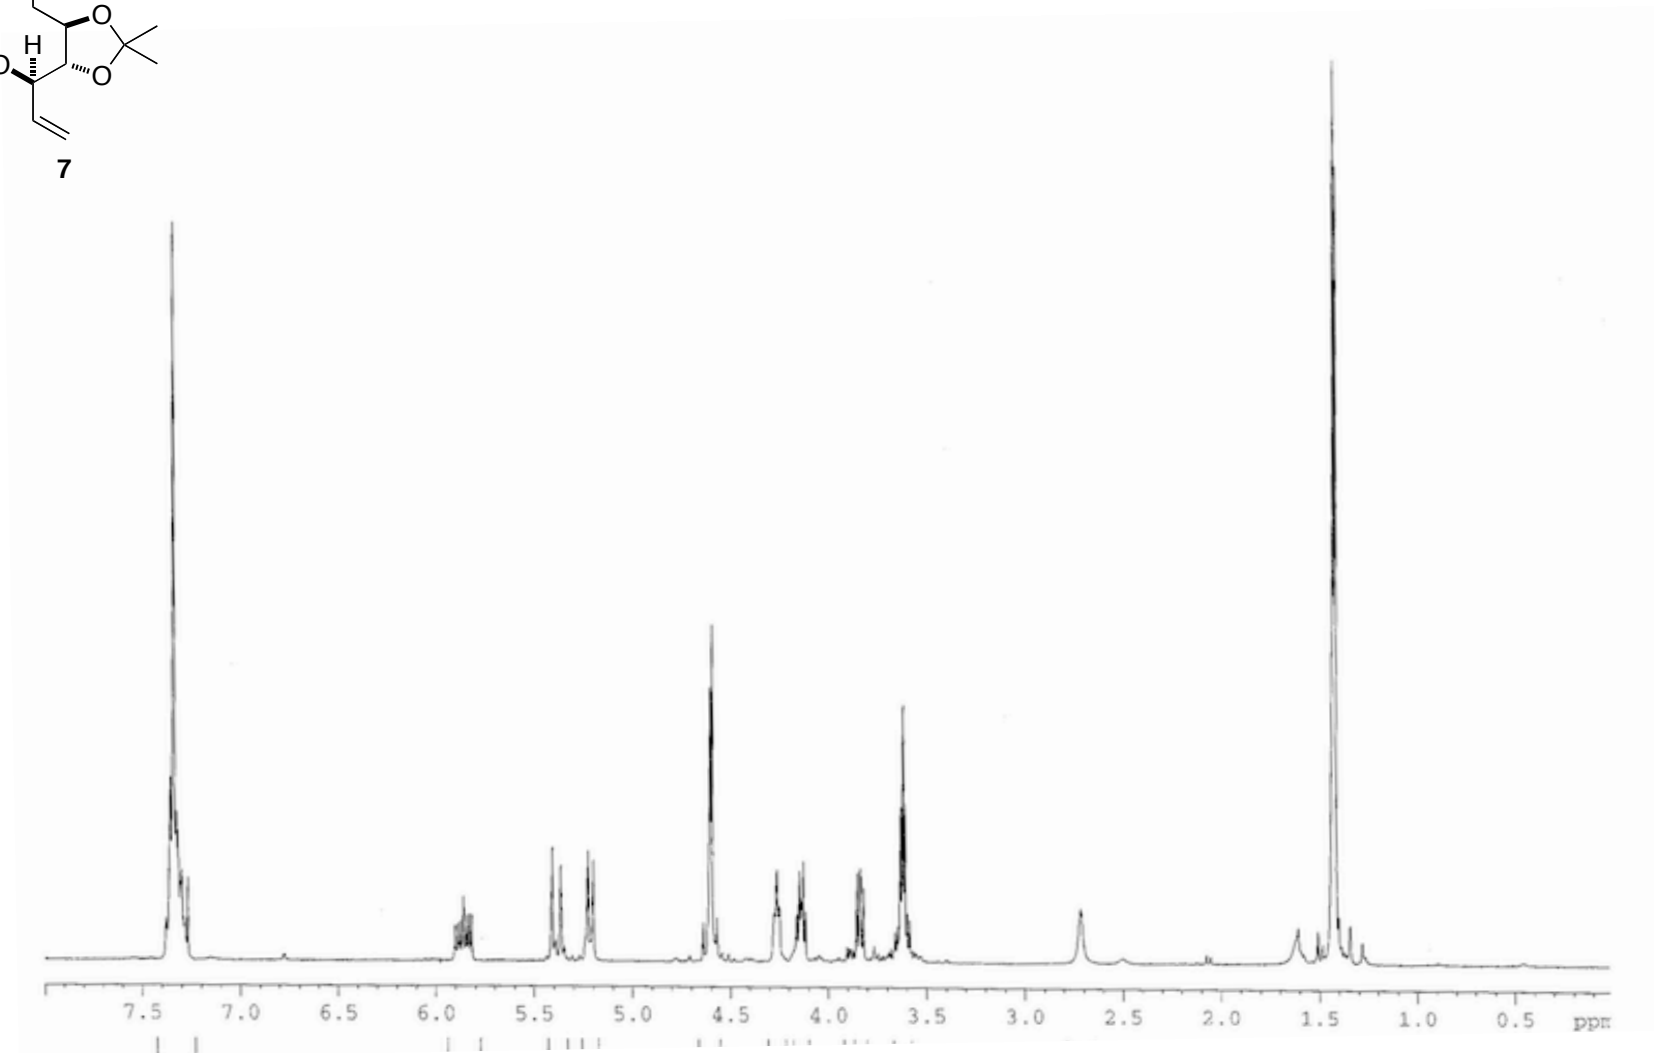

$^{13}\text{C}$  NMR (100 MHz) of alcohol **7** (in  $\text{CDCl}_3$ )

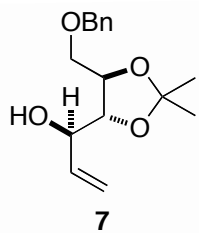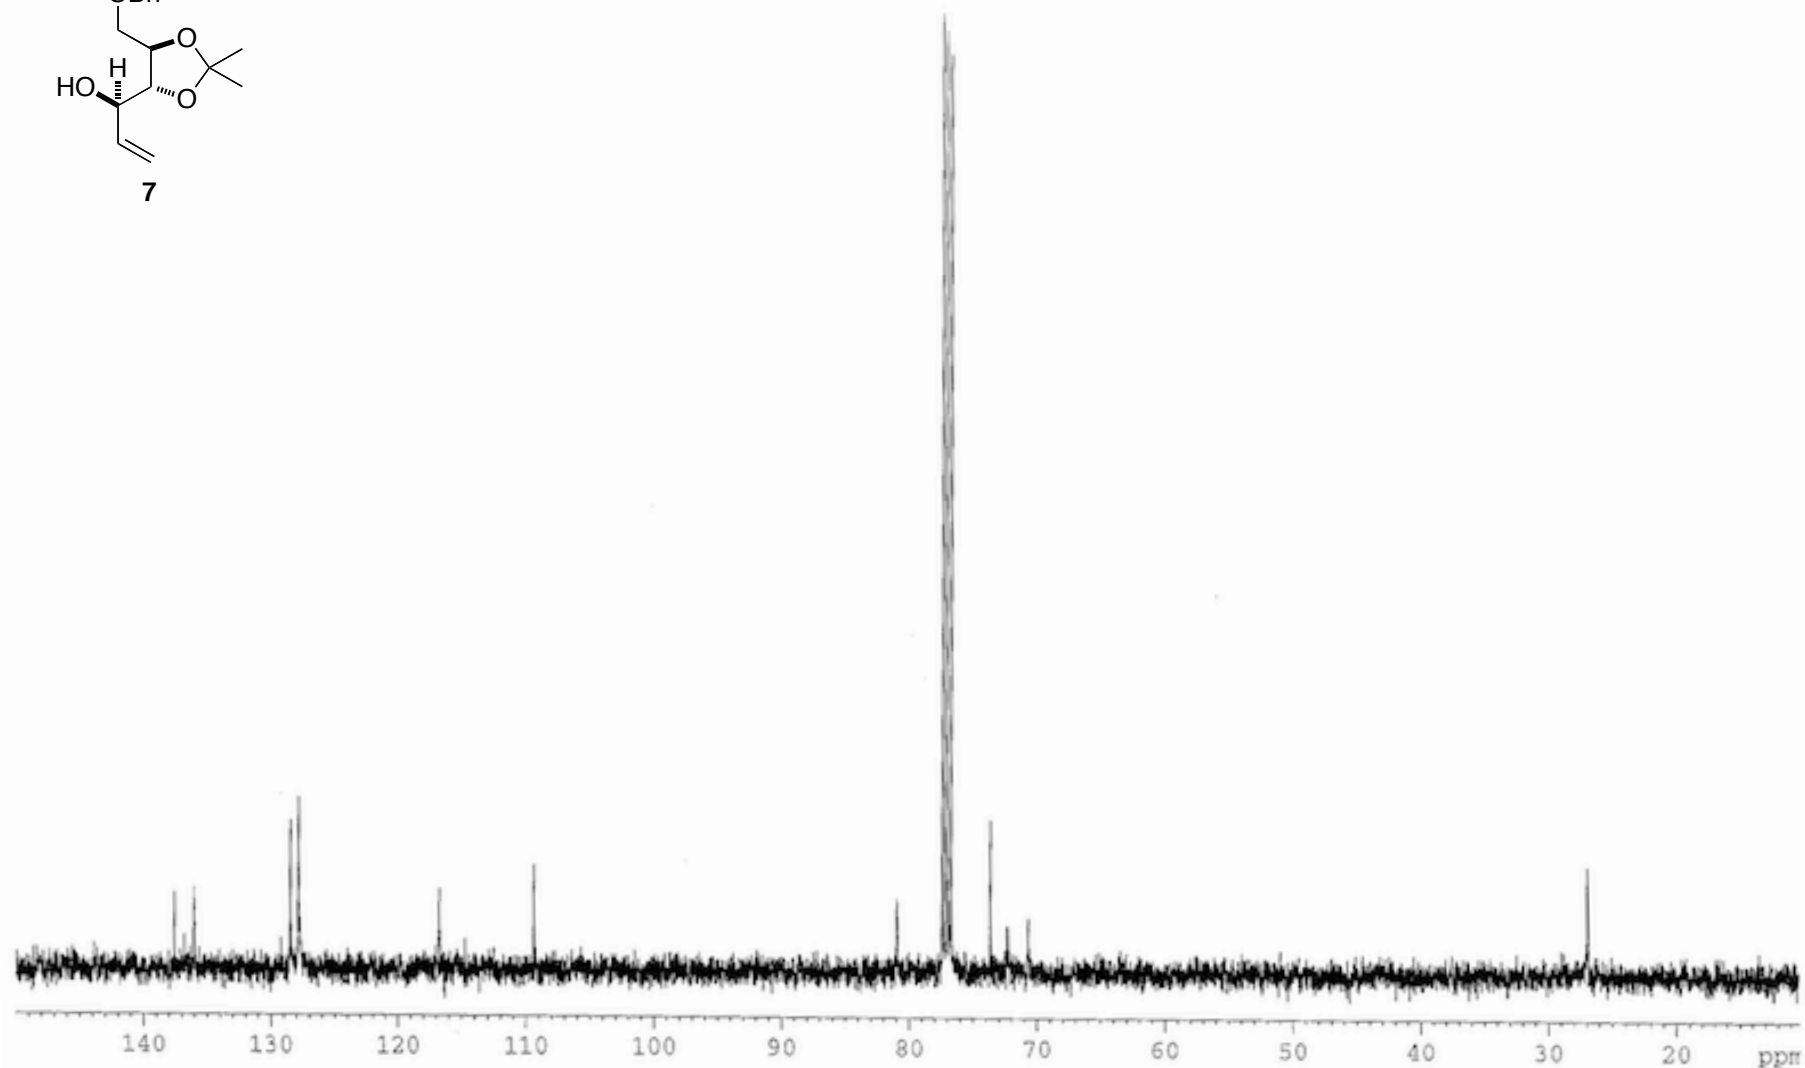

$^1\text{H}$  NMR (400 MHz) of acid **8** (in  $\text{CDCl}_3$ )

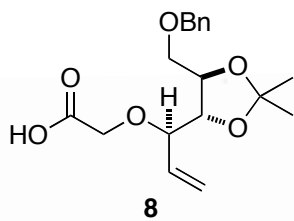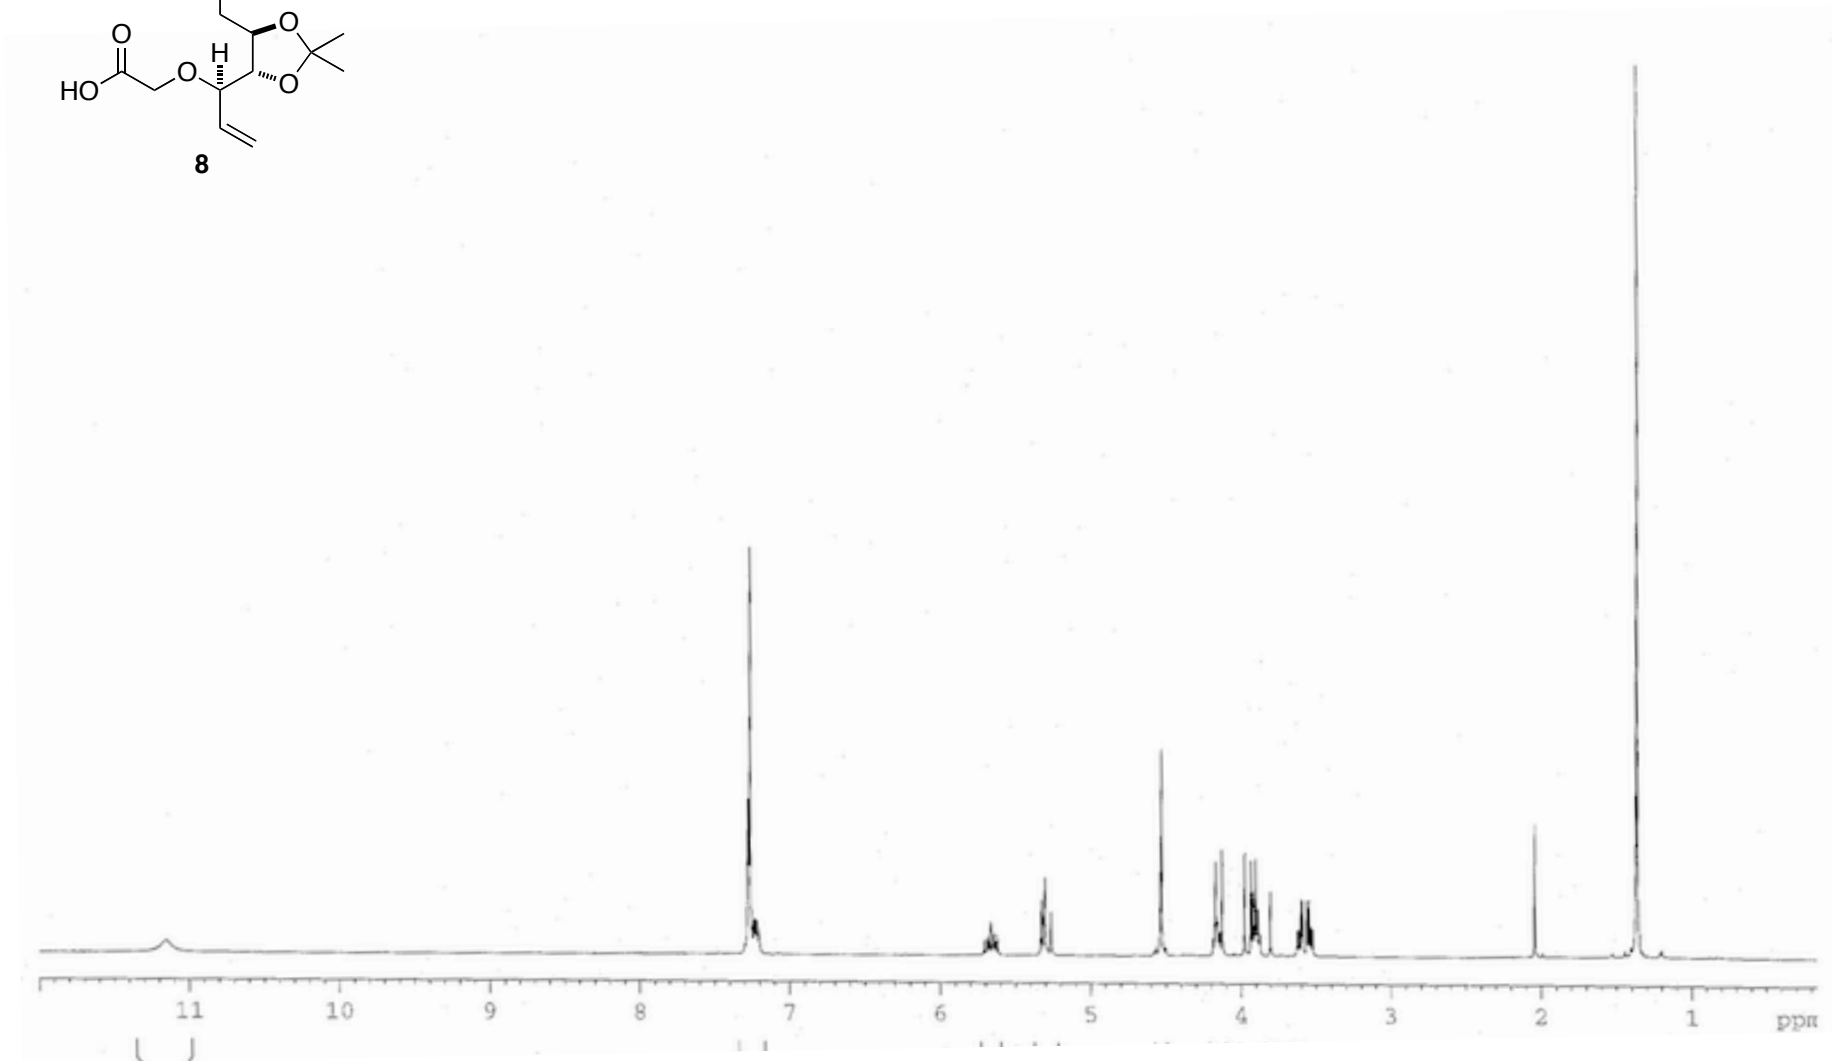

$^{13}\text{C}$  NMR (100 MHz) of acid **8** (in  $\text{CDCl}_3$ )

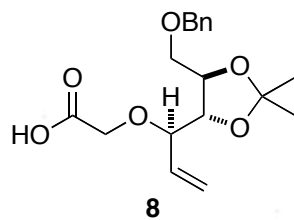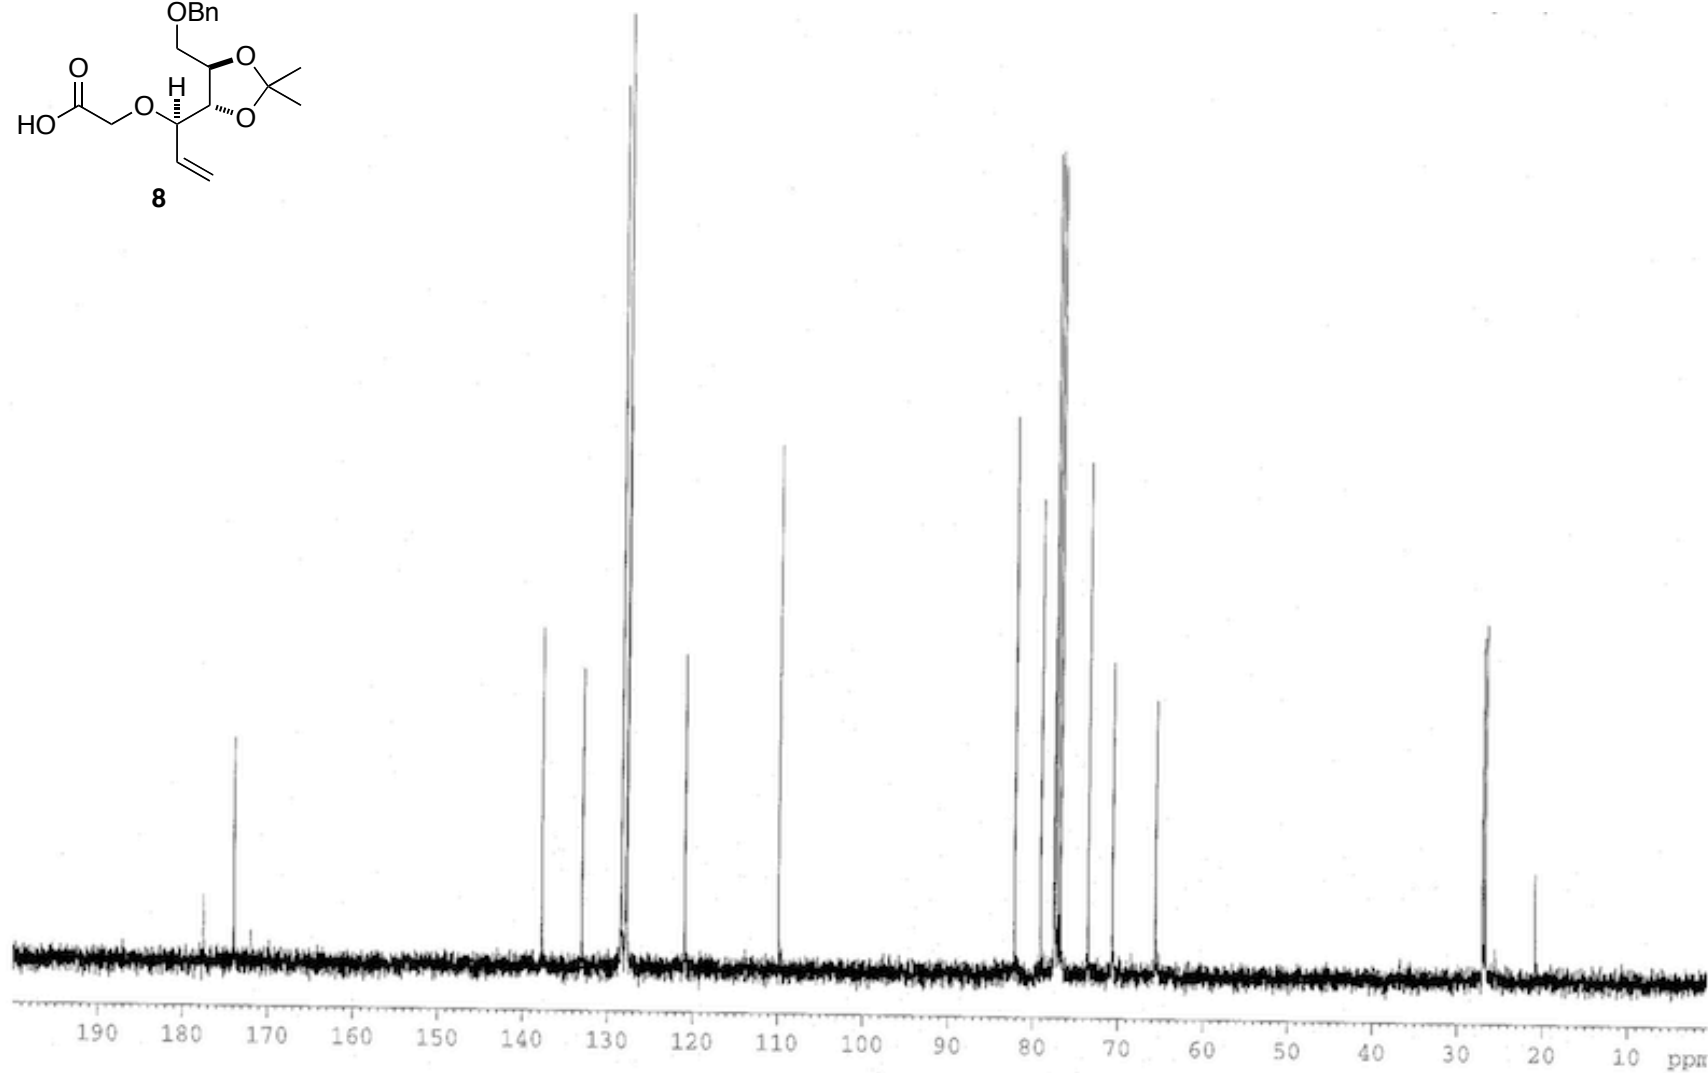

$^1\text{H}$  NMR (400 MHz) of glycolate **9** (in  $\text{CDCl}_3$ )

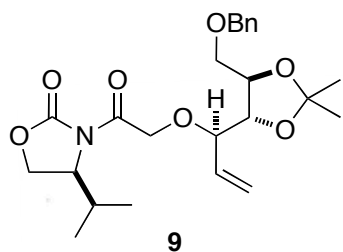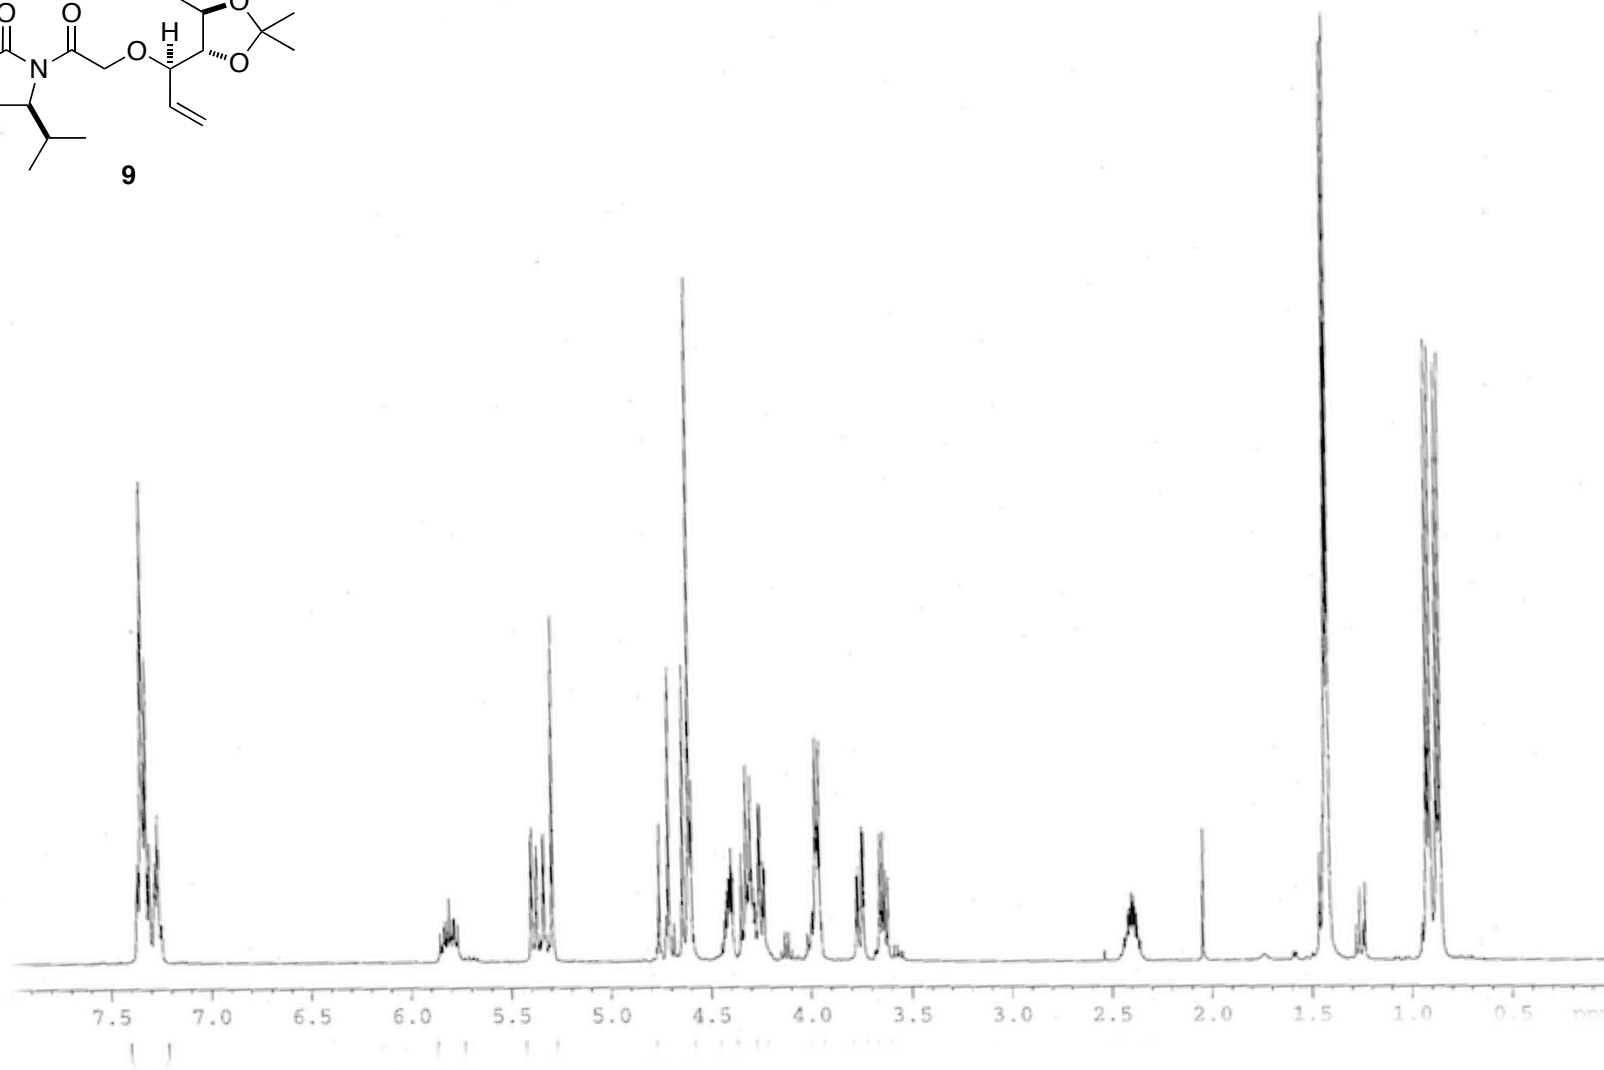

$^{13}\text{C}$  NMR (100 MHz) of glycolate **9** (in  $\text{CDCl}_3$ )

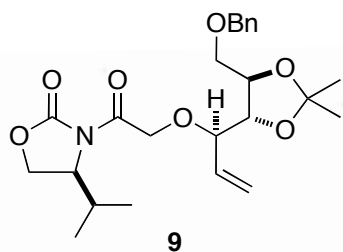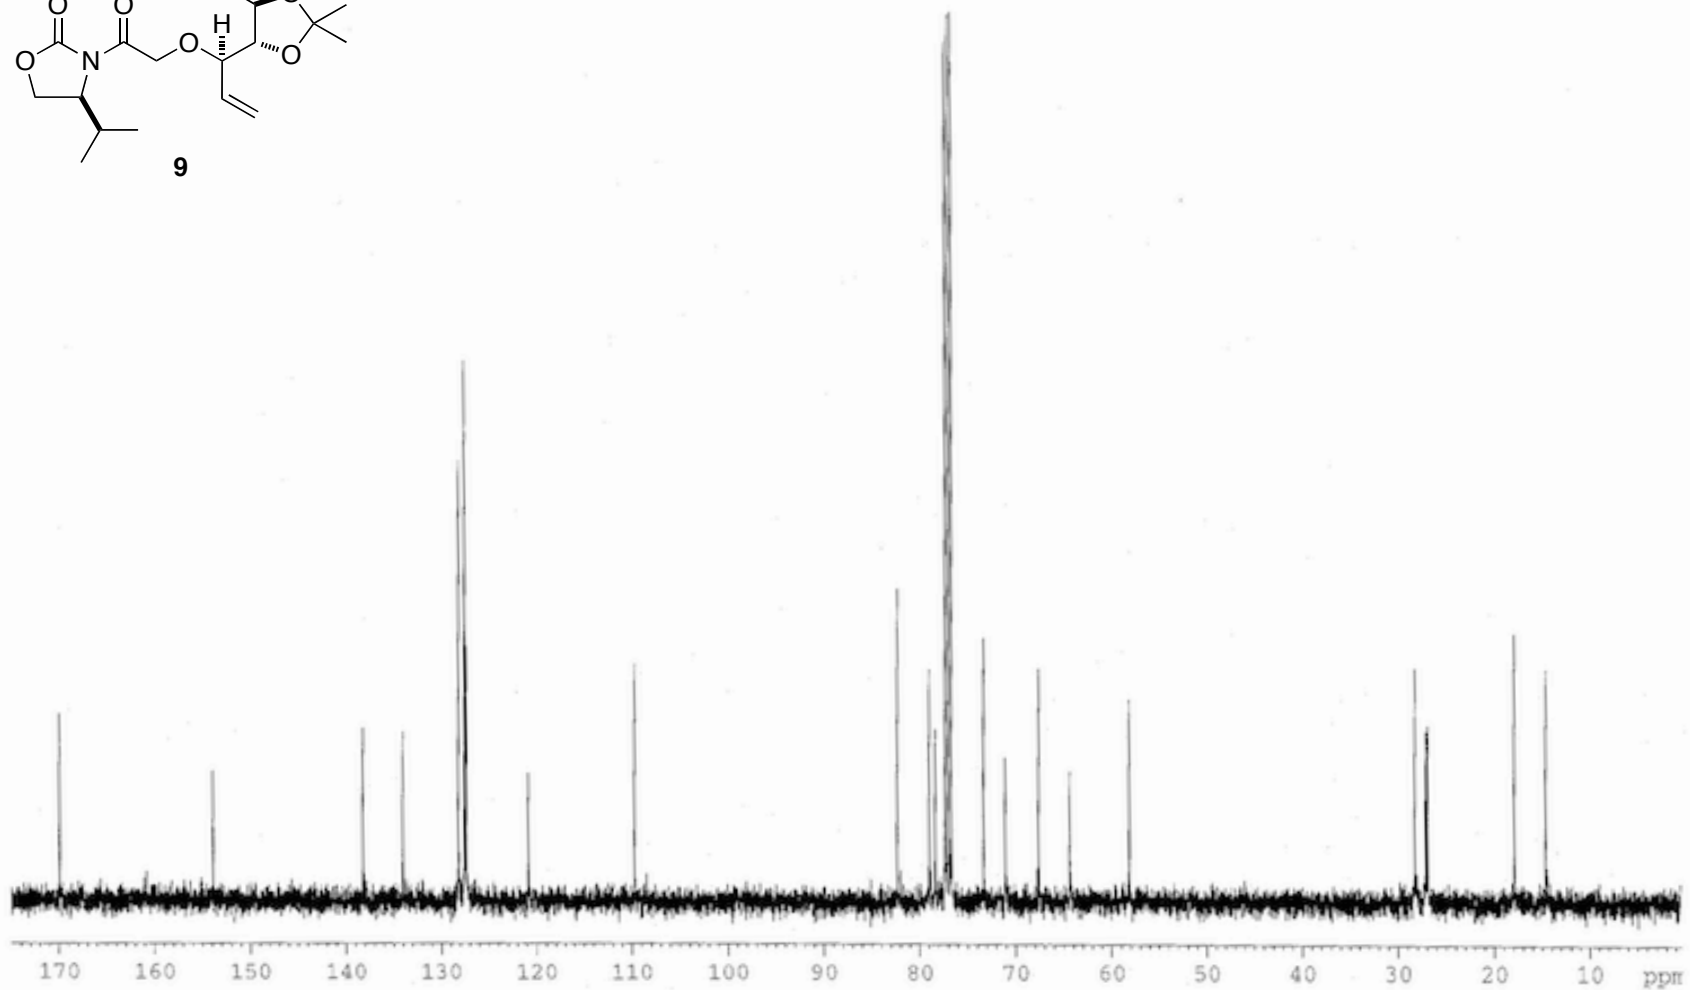

$^1\text{H}$  NMR (400 MHz) of alkylation product **10** (in  $\text{CDCl}_3$ )

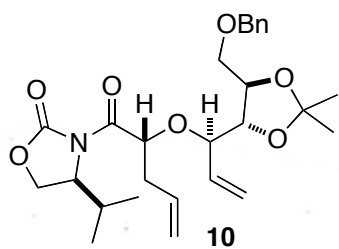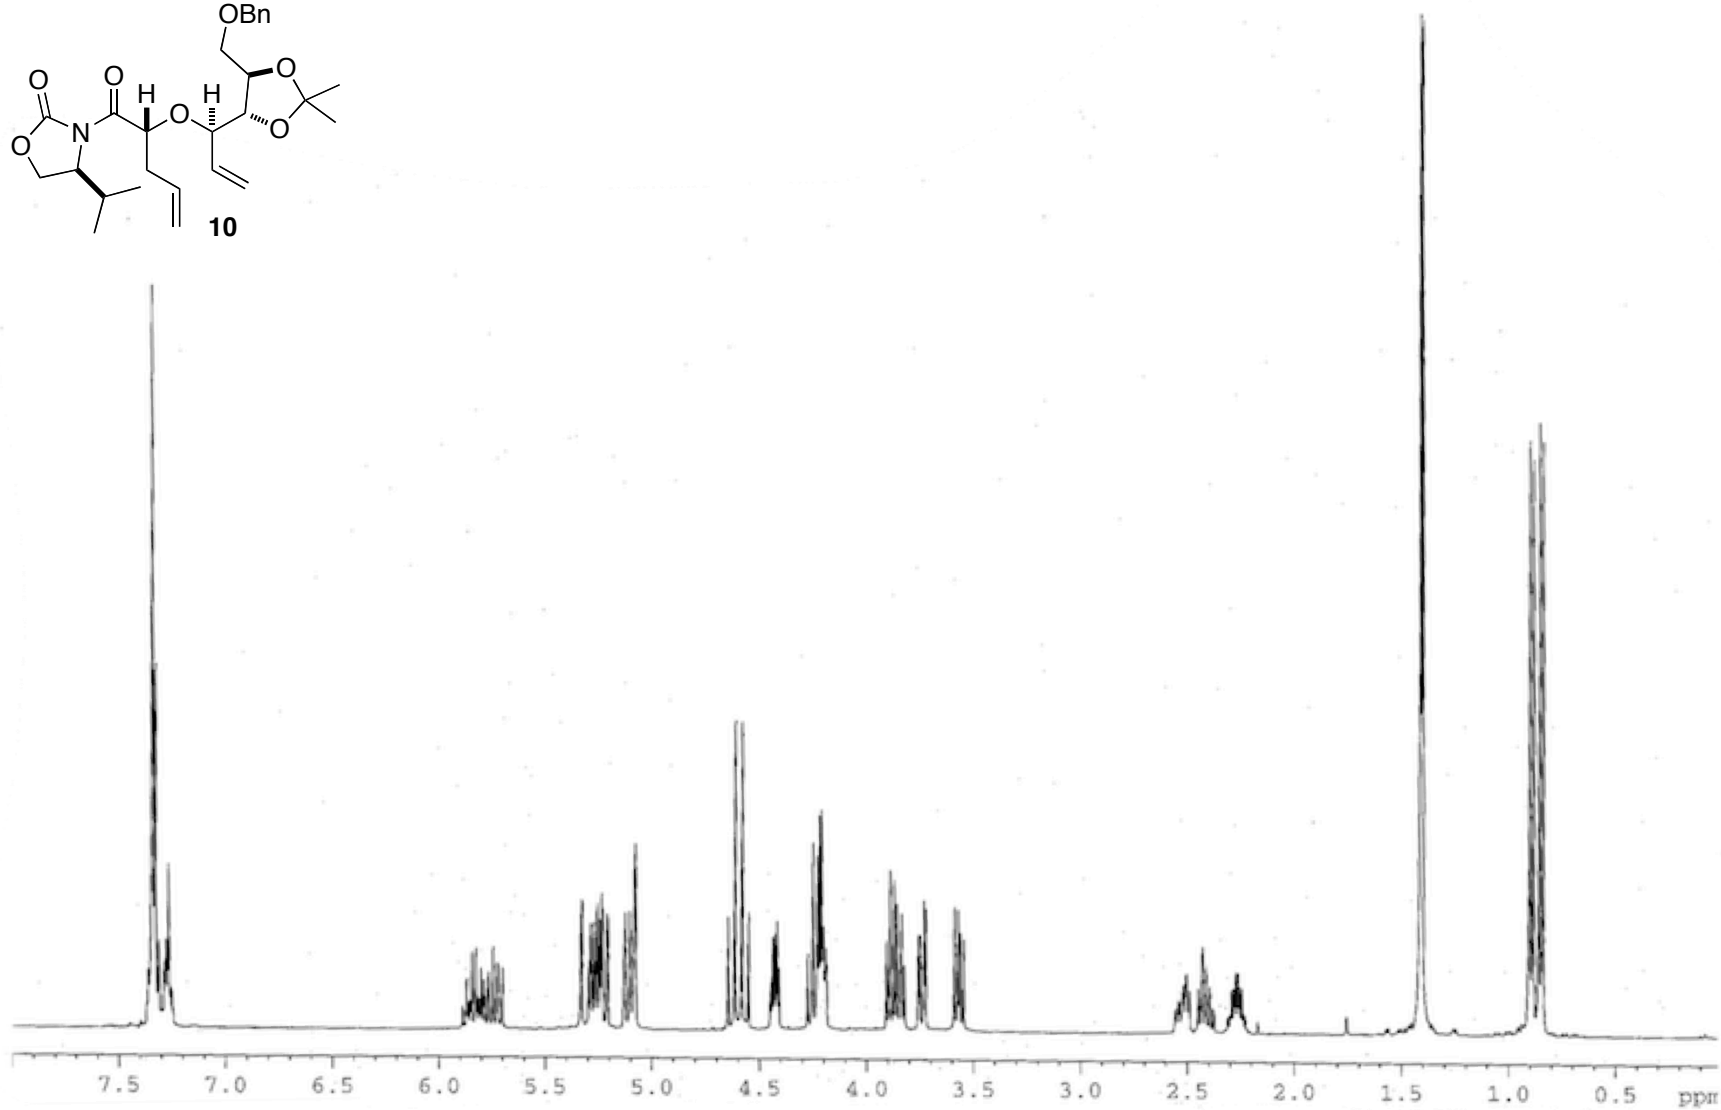



$^{13}\text{C}$  NMR (100 MHz) of alkylation product **10** (in  $\text{CDCl}_3$ )

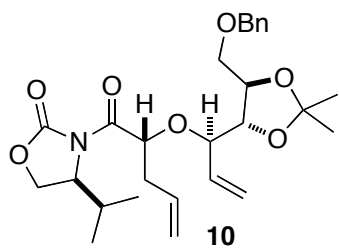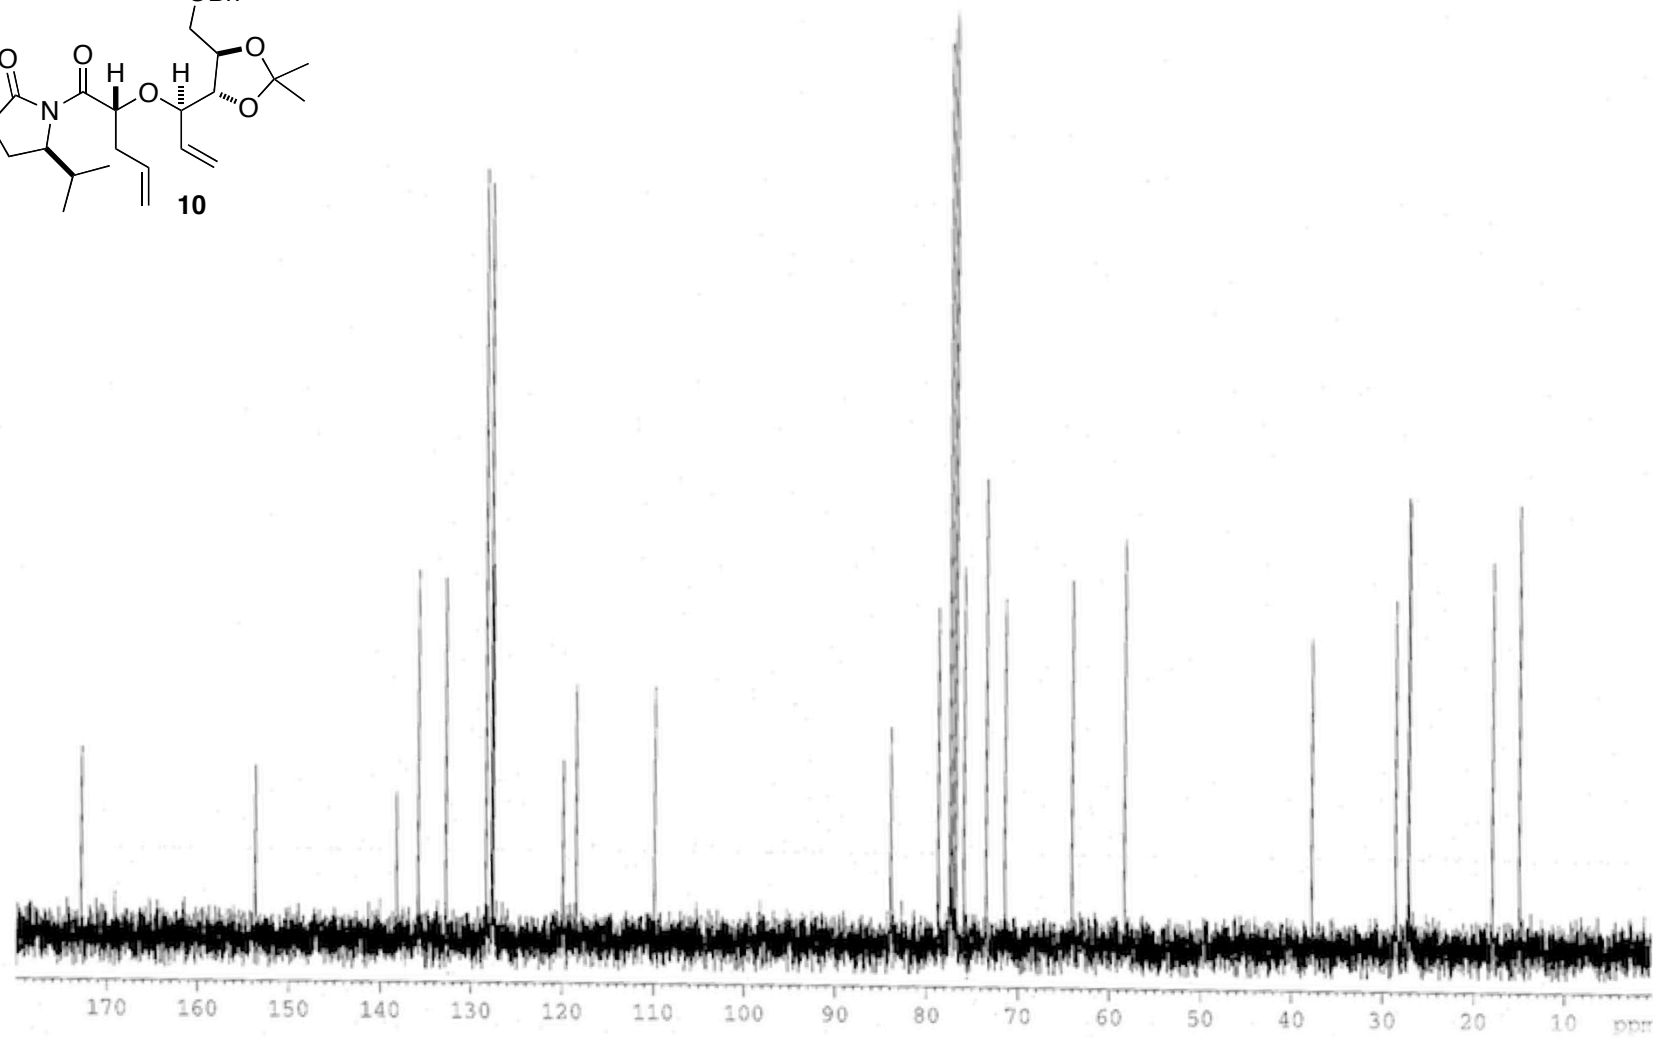

$^1\text{H}$  NMR (300 MHz) of diene **11** (in  $\text{CDCl}_3$ )

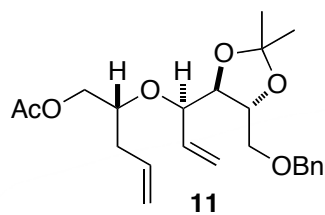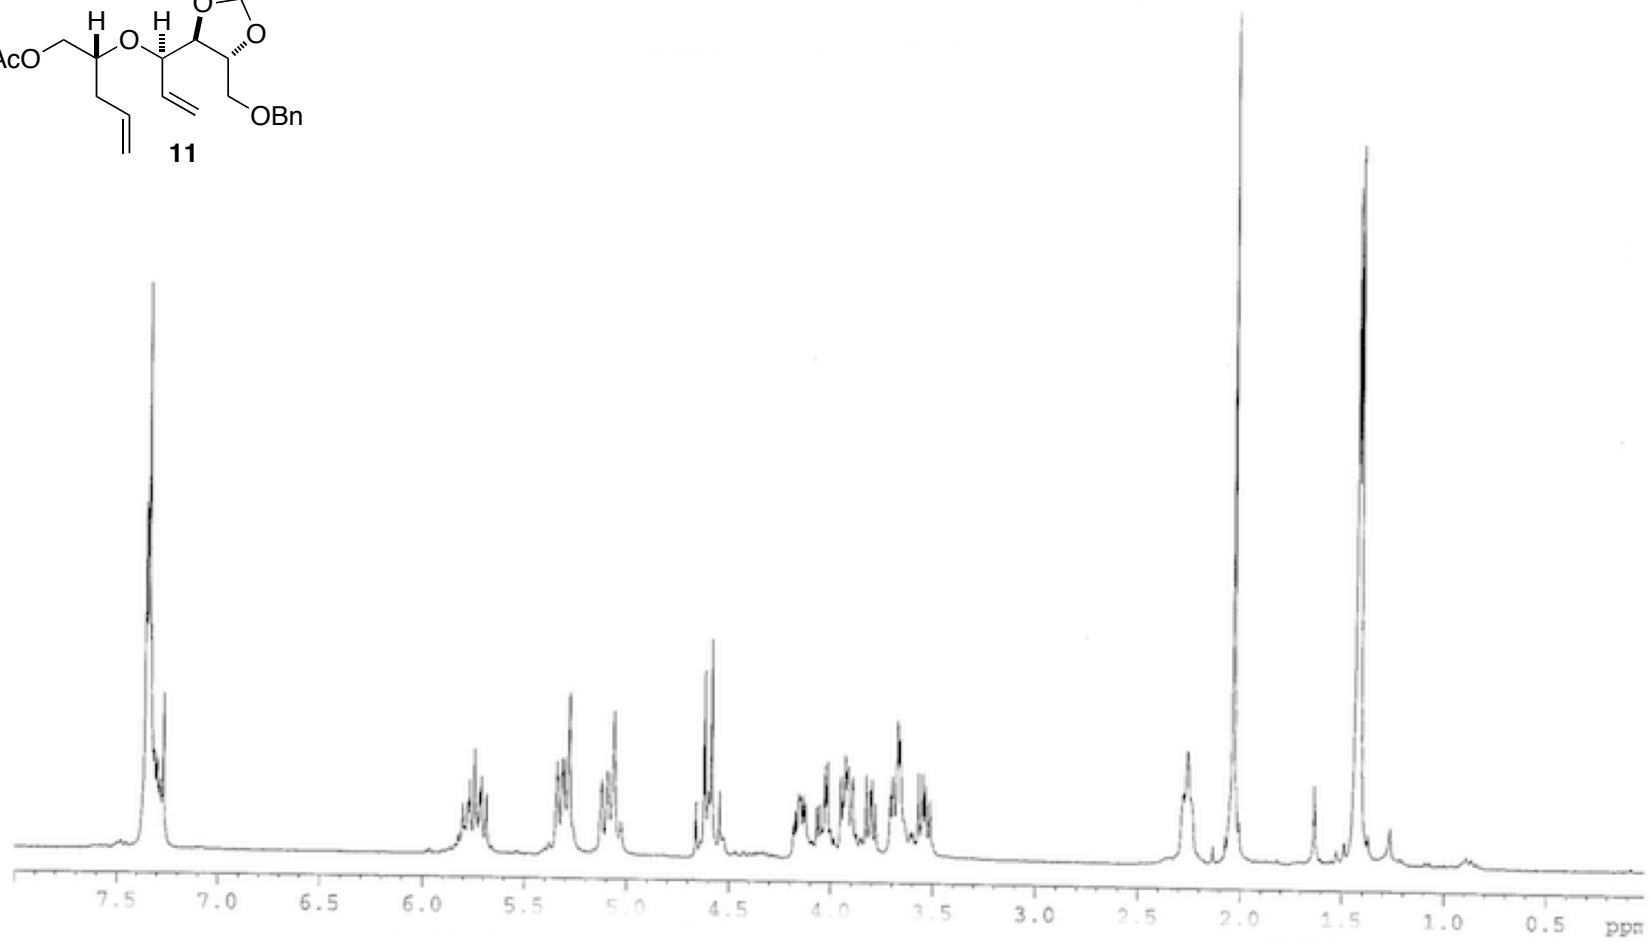

$^{13}\text{C}$  NMR (100 MHz) of diene **11** (in  $\text{CDCl}_3$ )

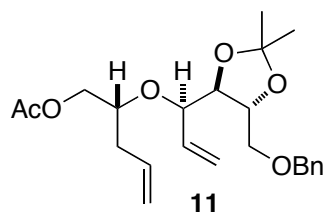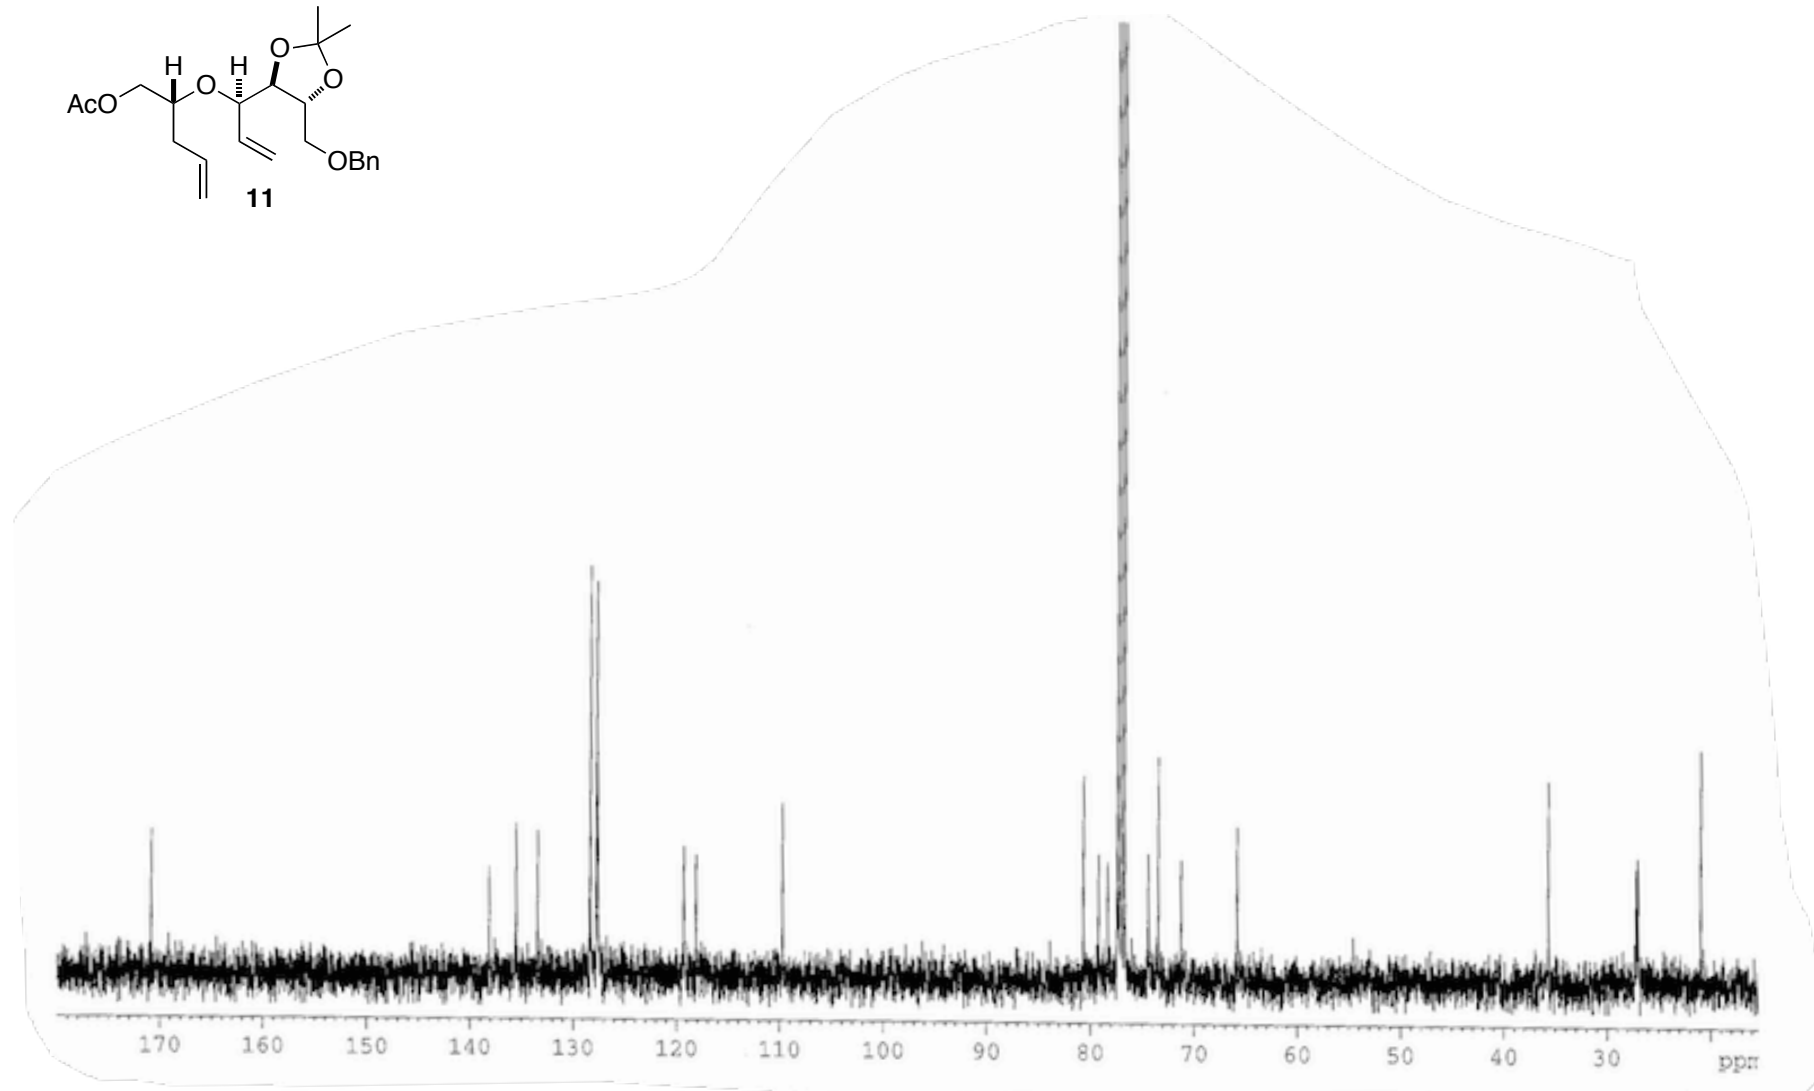

$^1\text{H}$  NMR (400 MHz) of THP **5** (in DMSO)

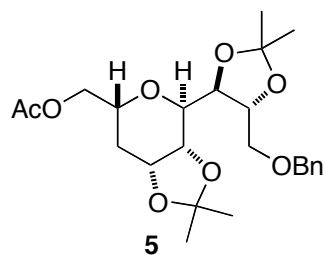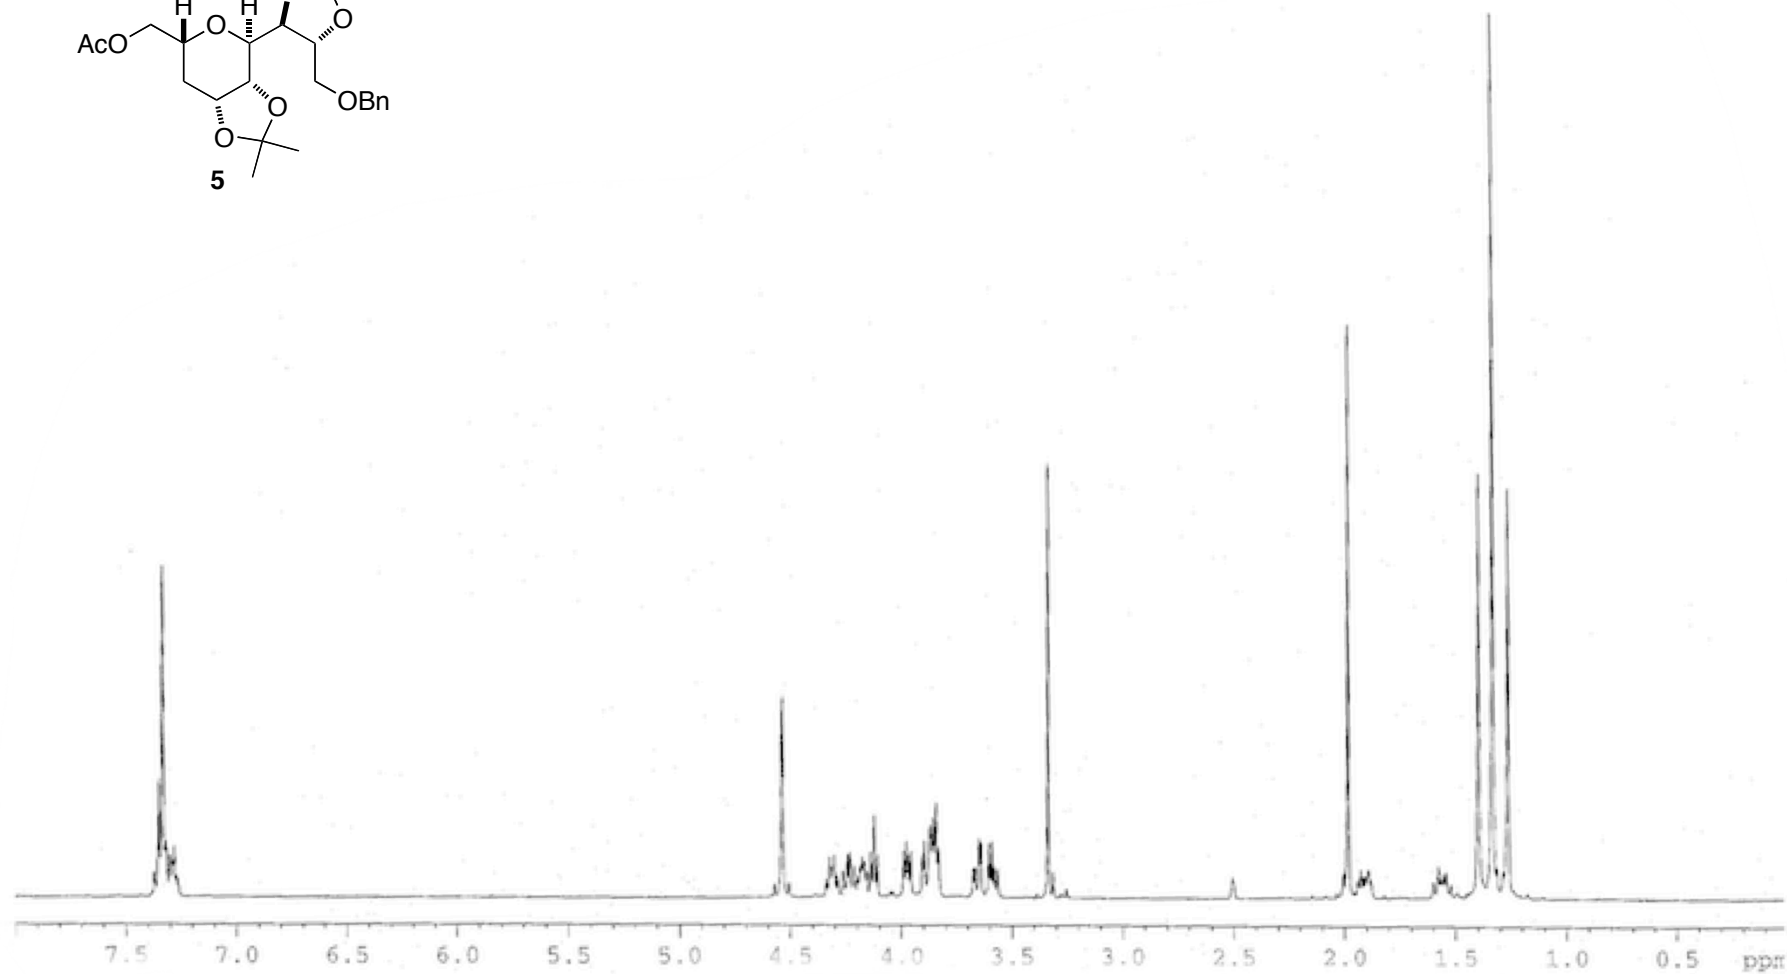

$^{13}\text{C}$  NMR (100 MHz) of THP **5** (in  $\text{CDCl}_3$ )

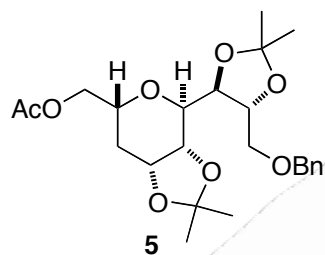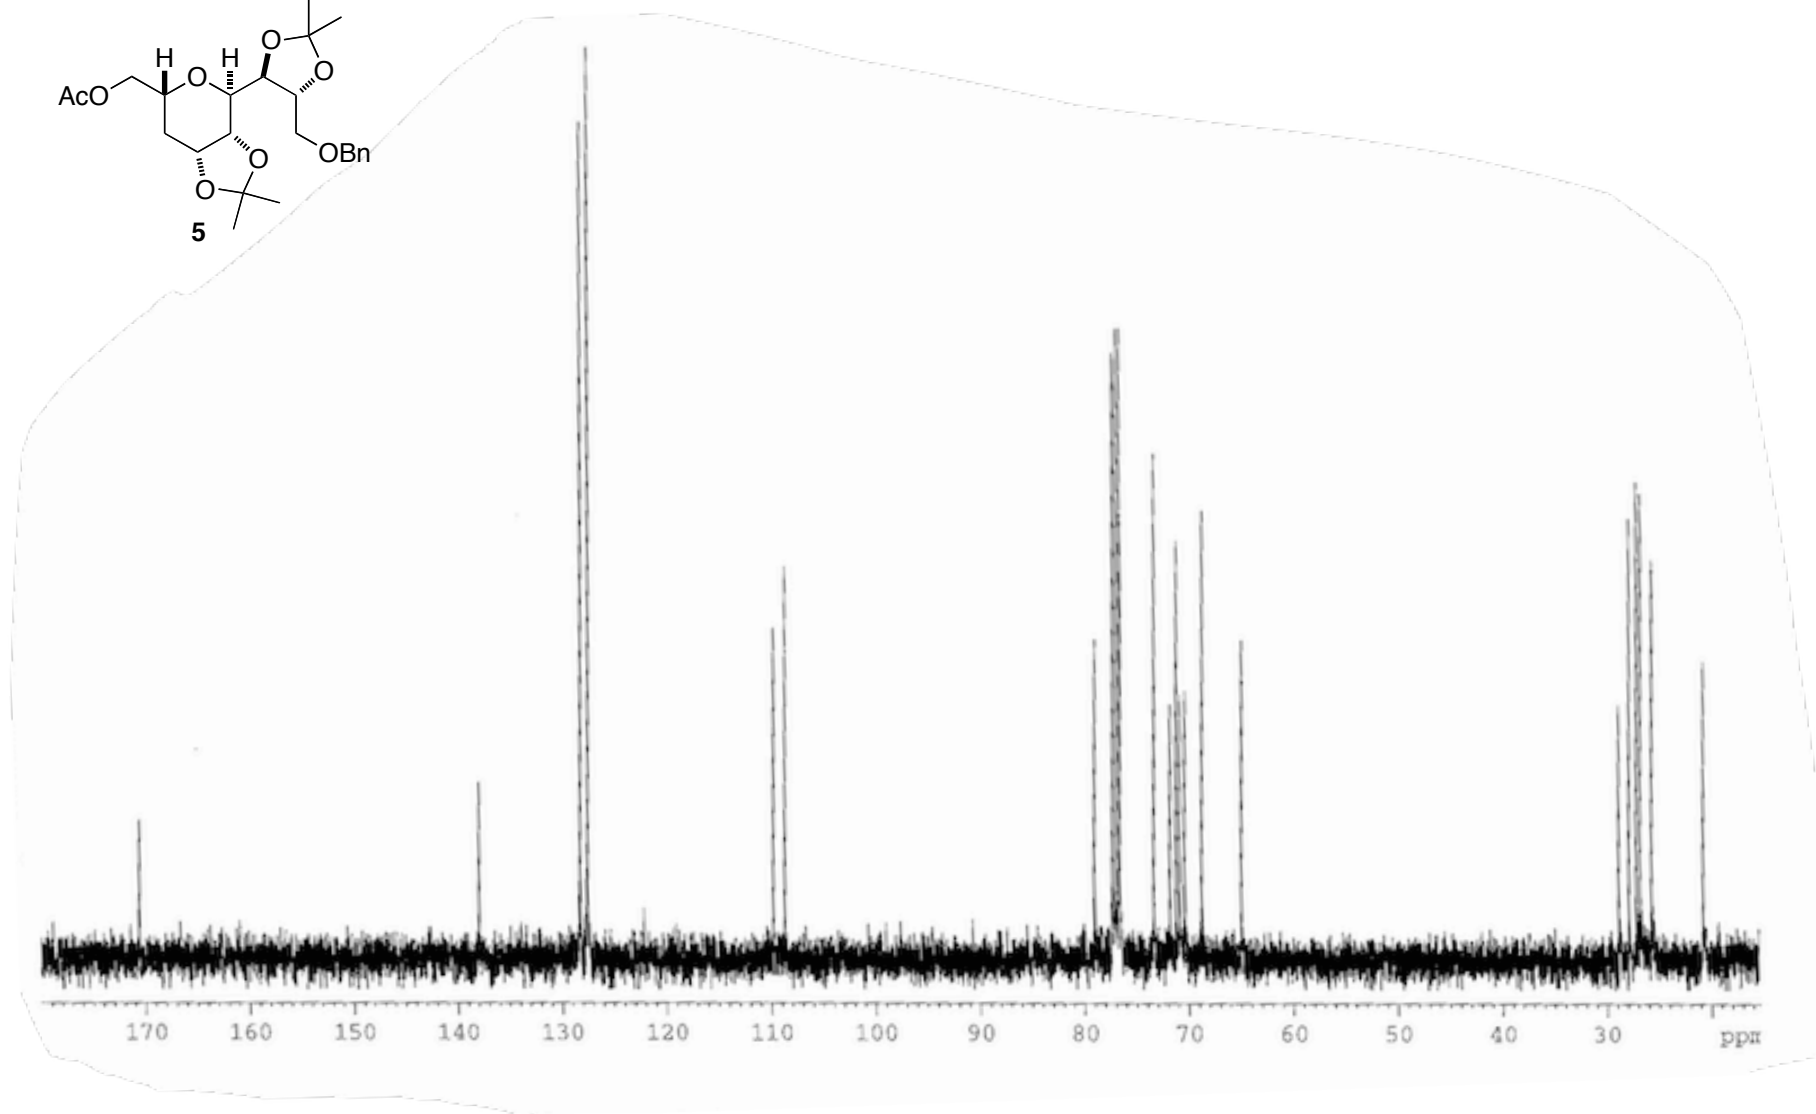

# COSY (400 MHz) of THP 5 (in DMSO)

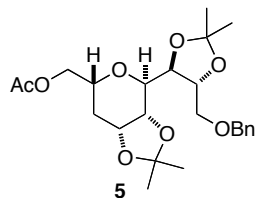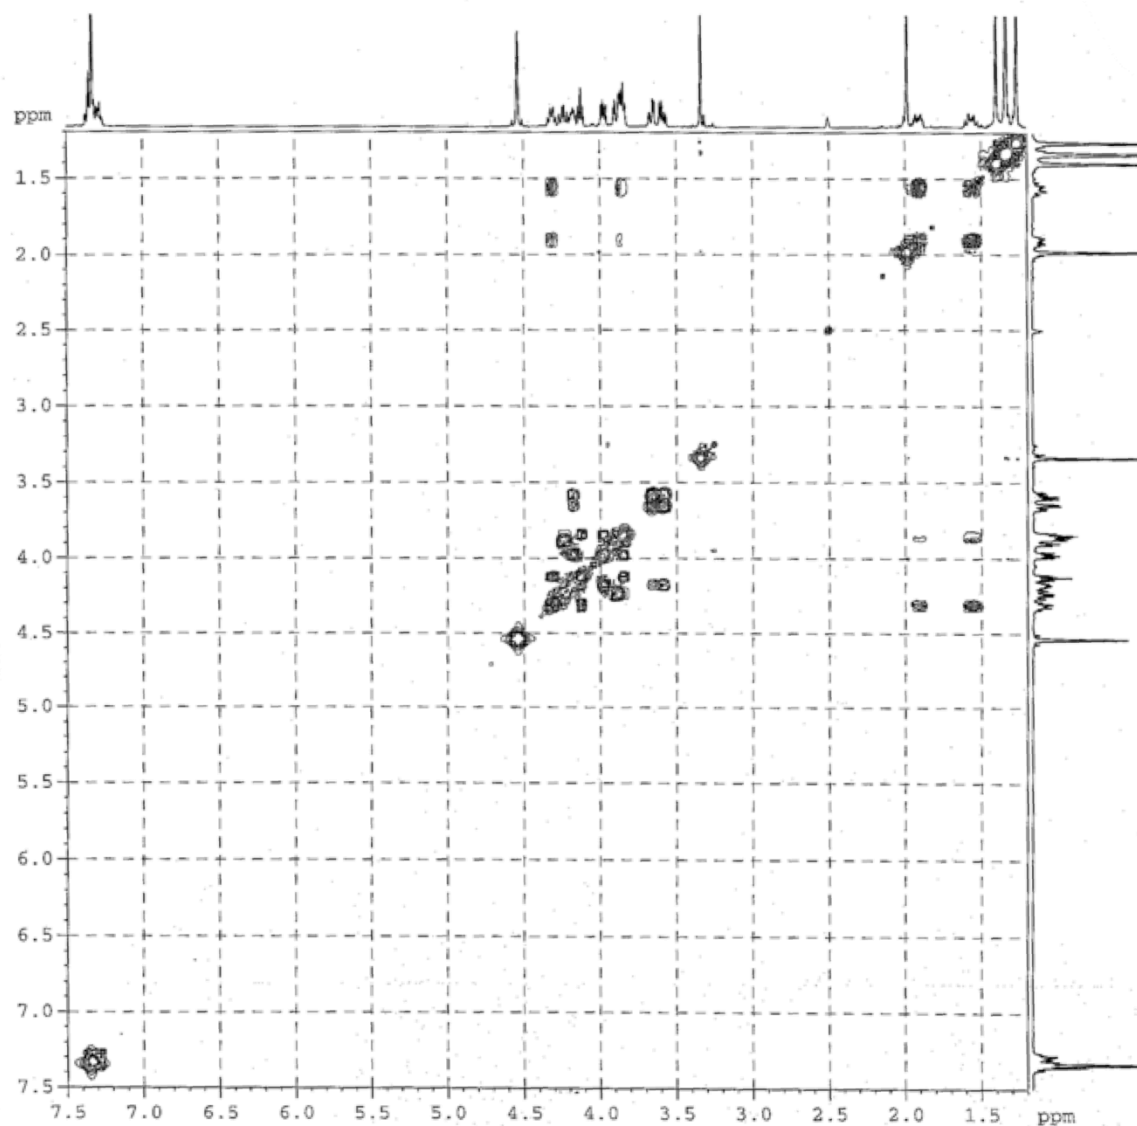

# NOESY (400 MHz) of THP 5 (in DMSO)

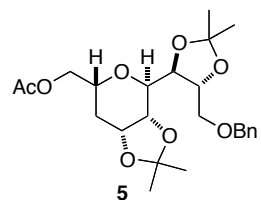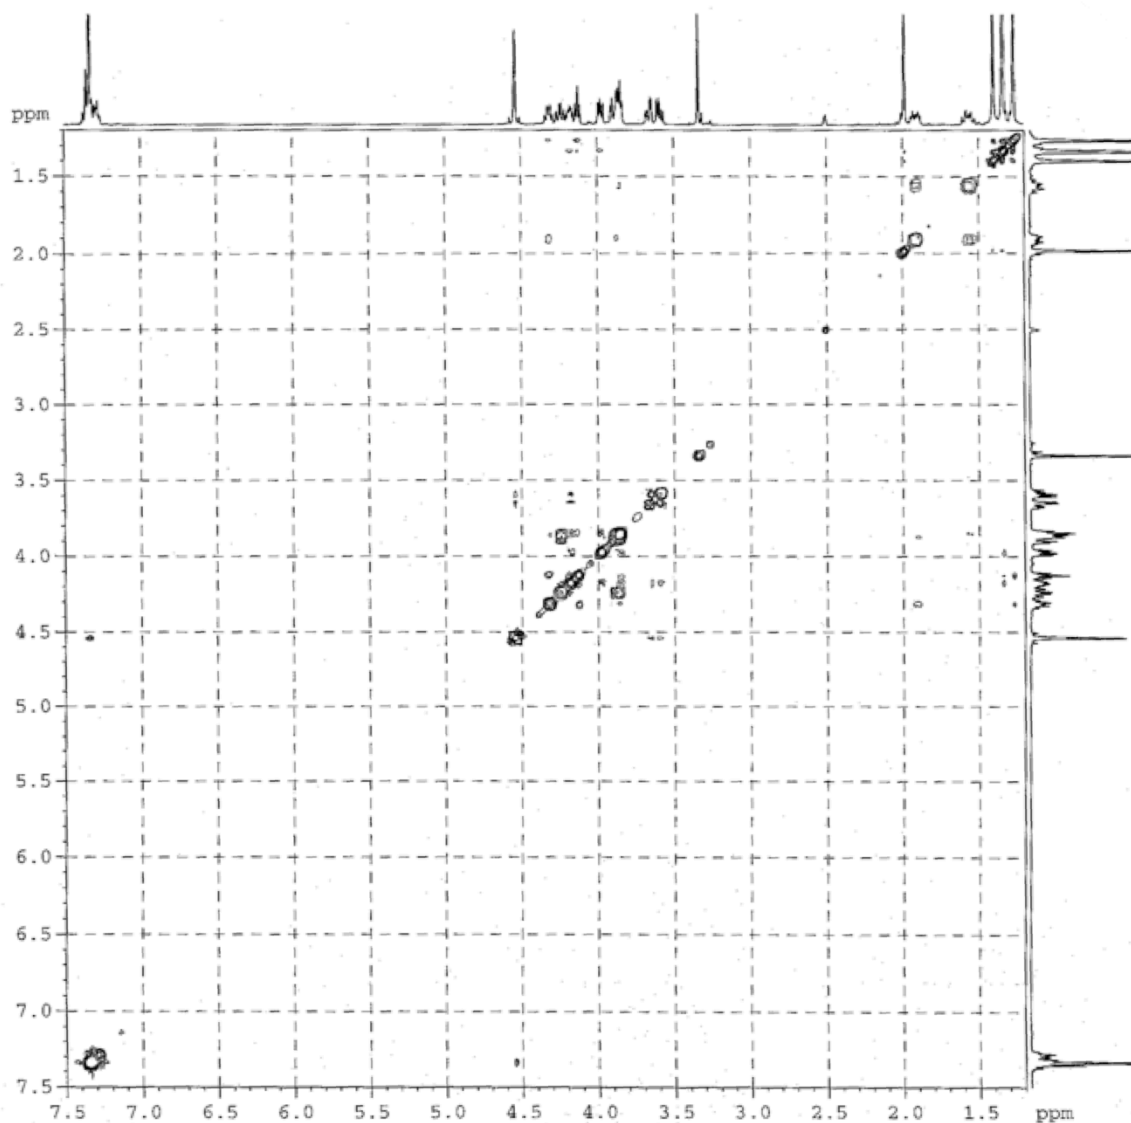

$^1\text{H}$  NMR (400 MHz) of primary alcohol (in  $\text{CDCl}_3$ )

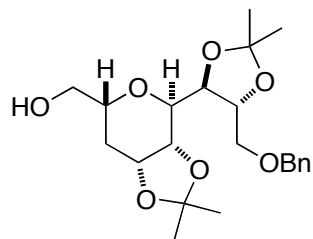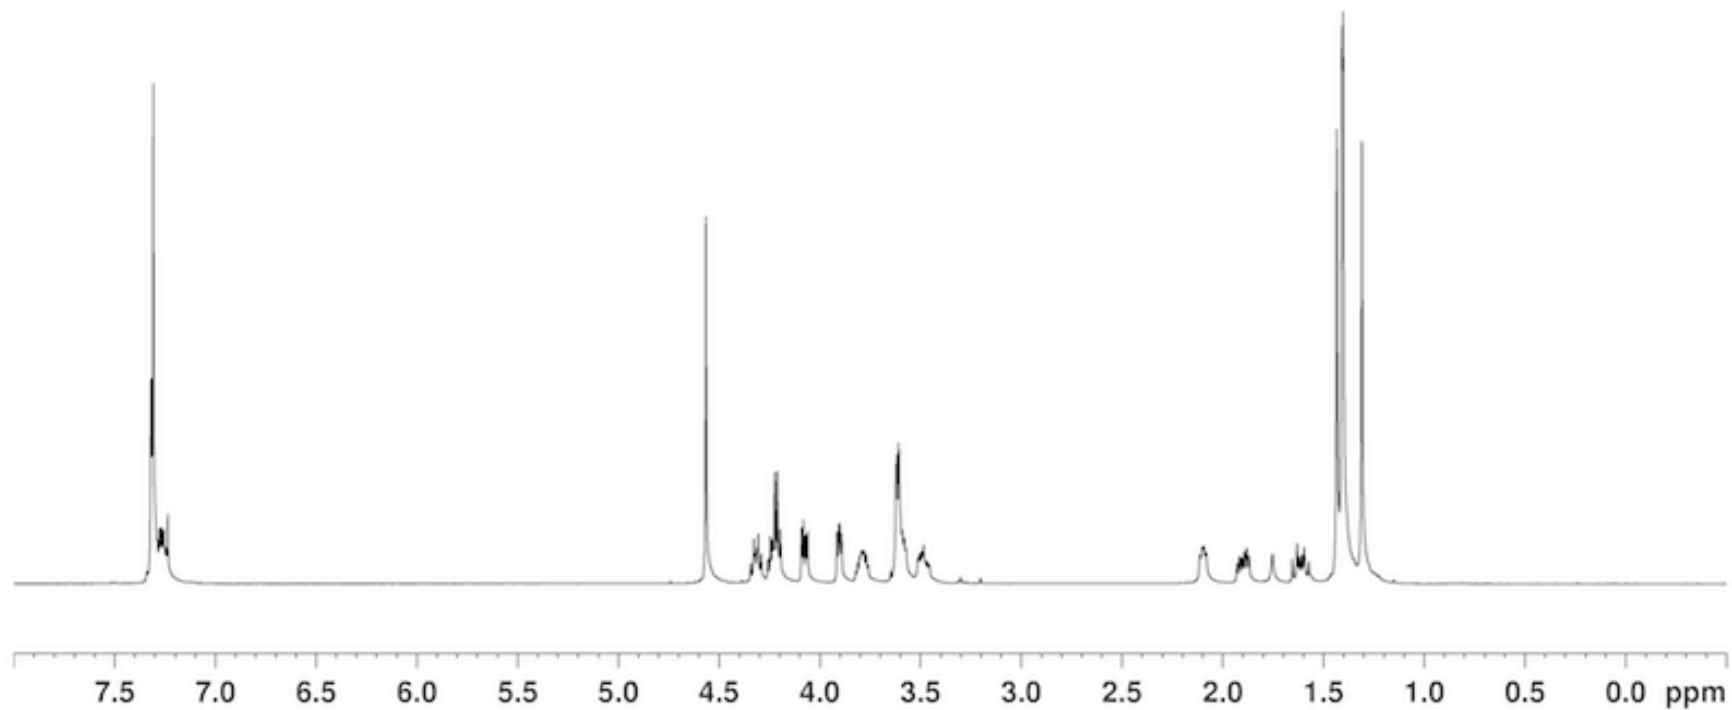



$^{13}\text{C}$  NMR (100 MHz) of primary alcohol (in  $\text{CDCl}_3$ )

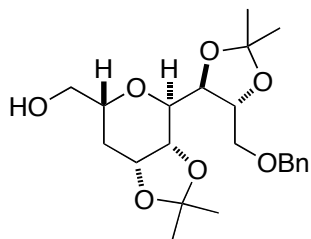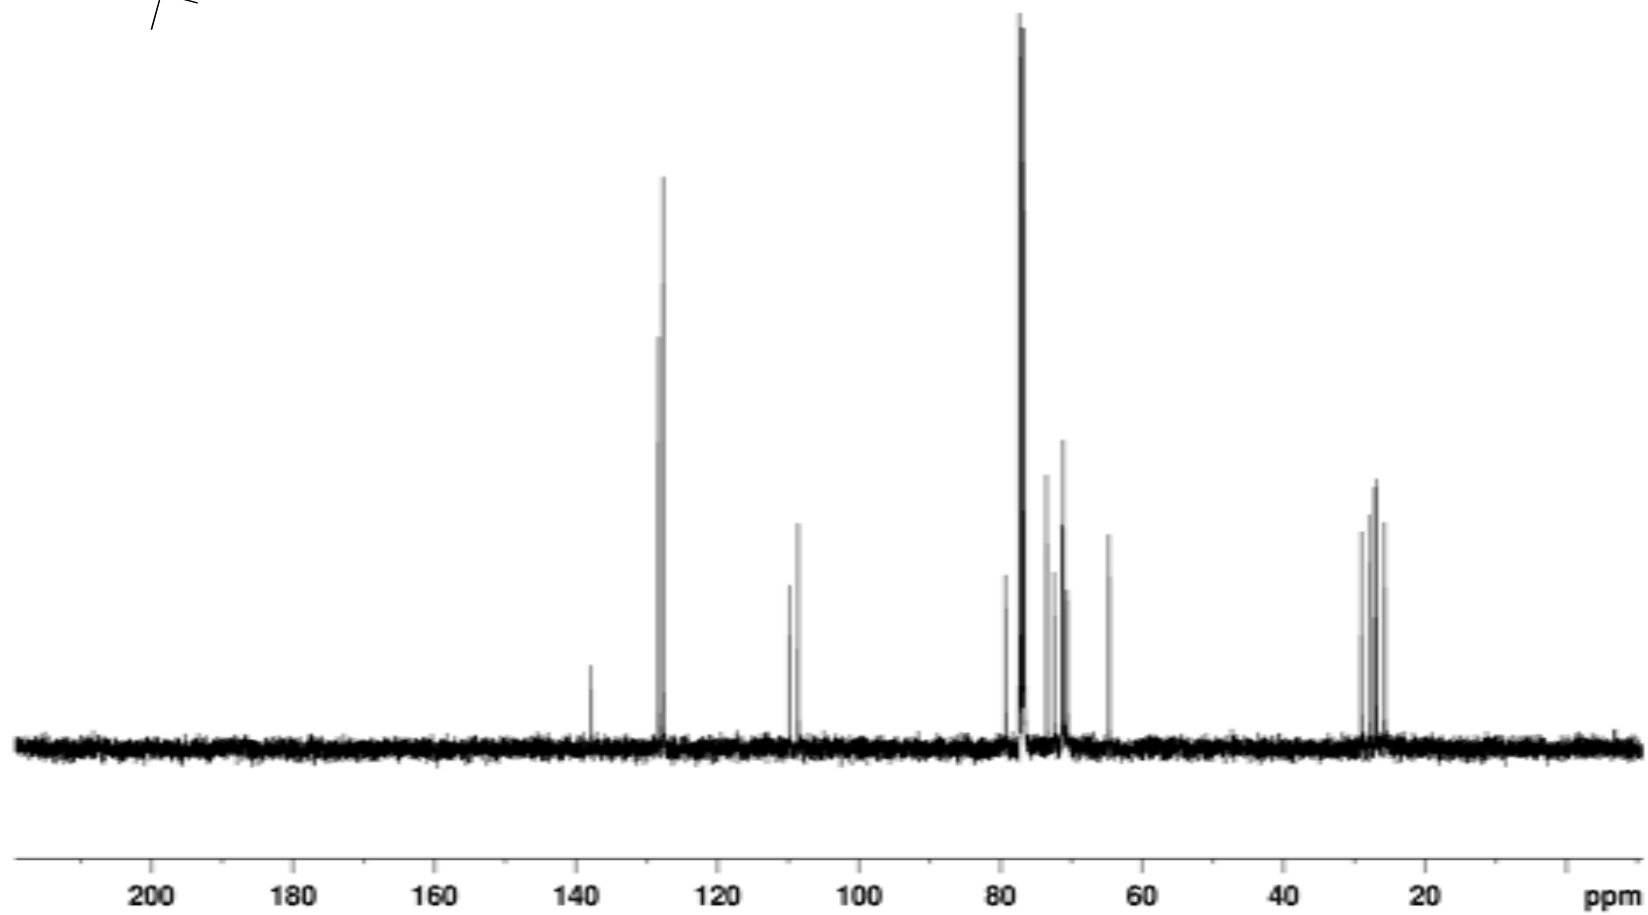

$^1\text{H}$  NMR (400 MHz) of *anti* aldol adduct **14** (in  $\text{CDCl}_3$ )

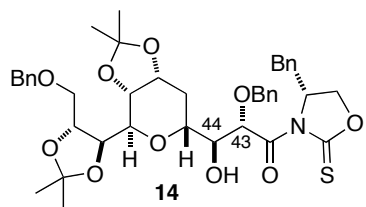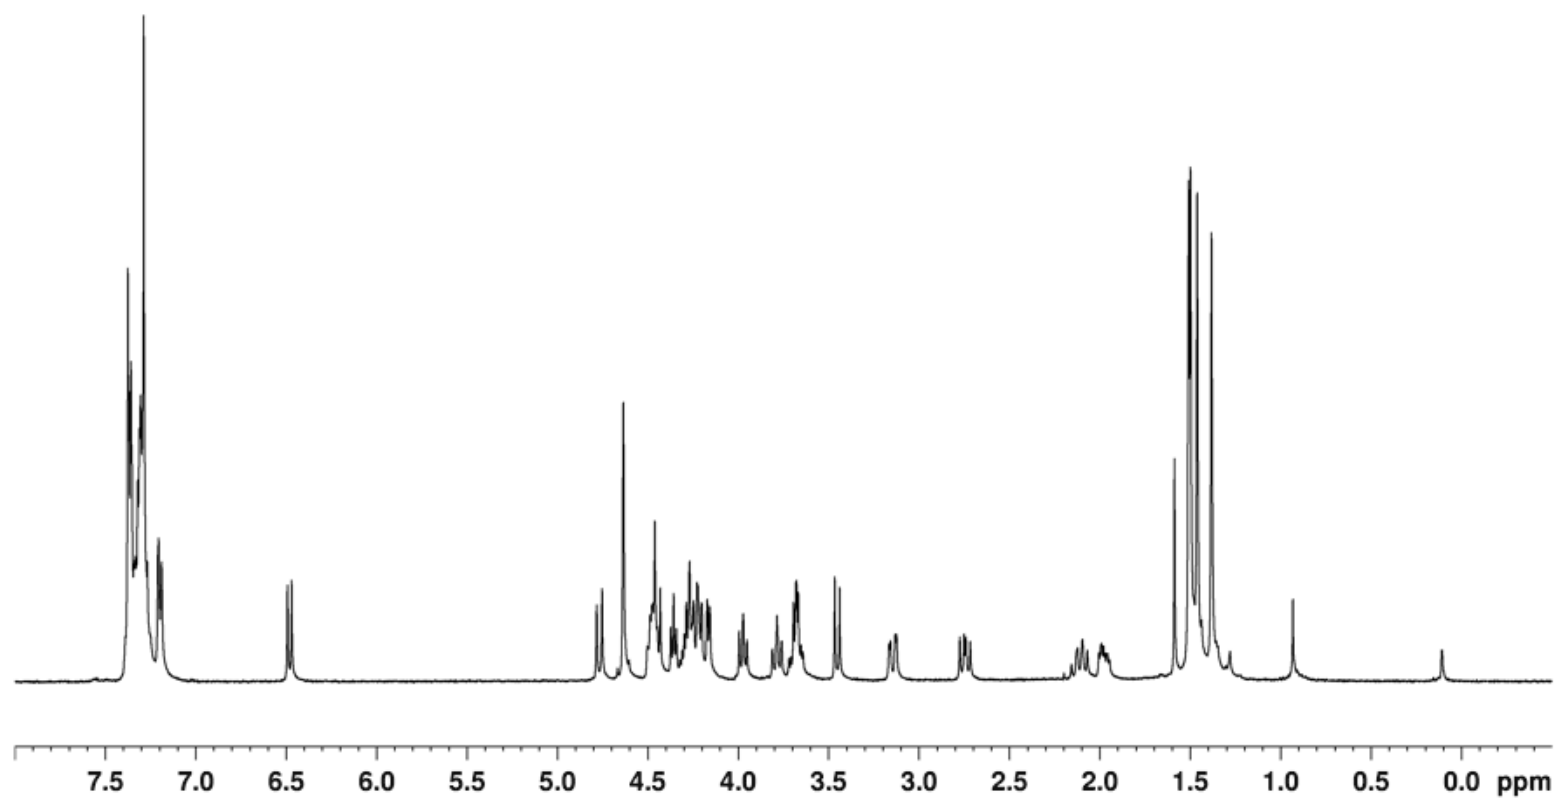

$^{13}\text{C}$  NMR (100 MHz) of *anti* aldol adduct **14** (in  $\text{CDCl}_3$ )

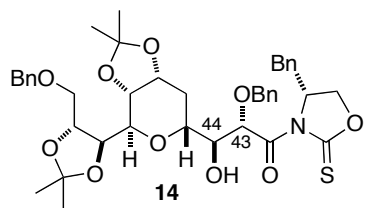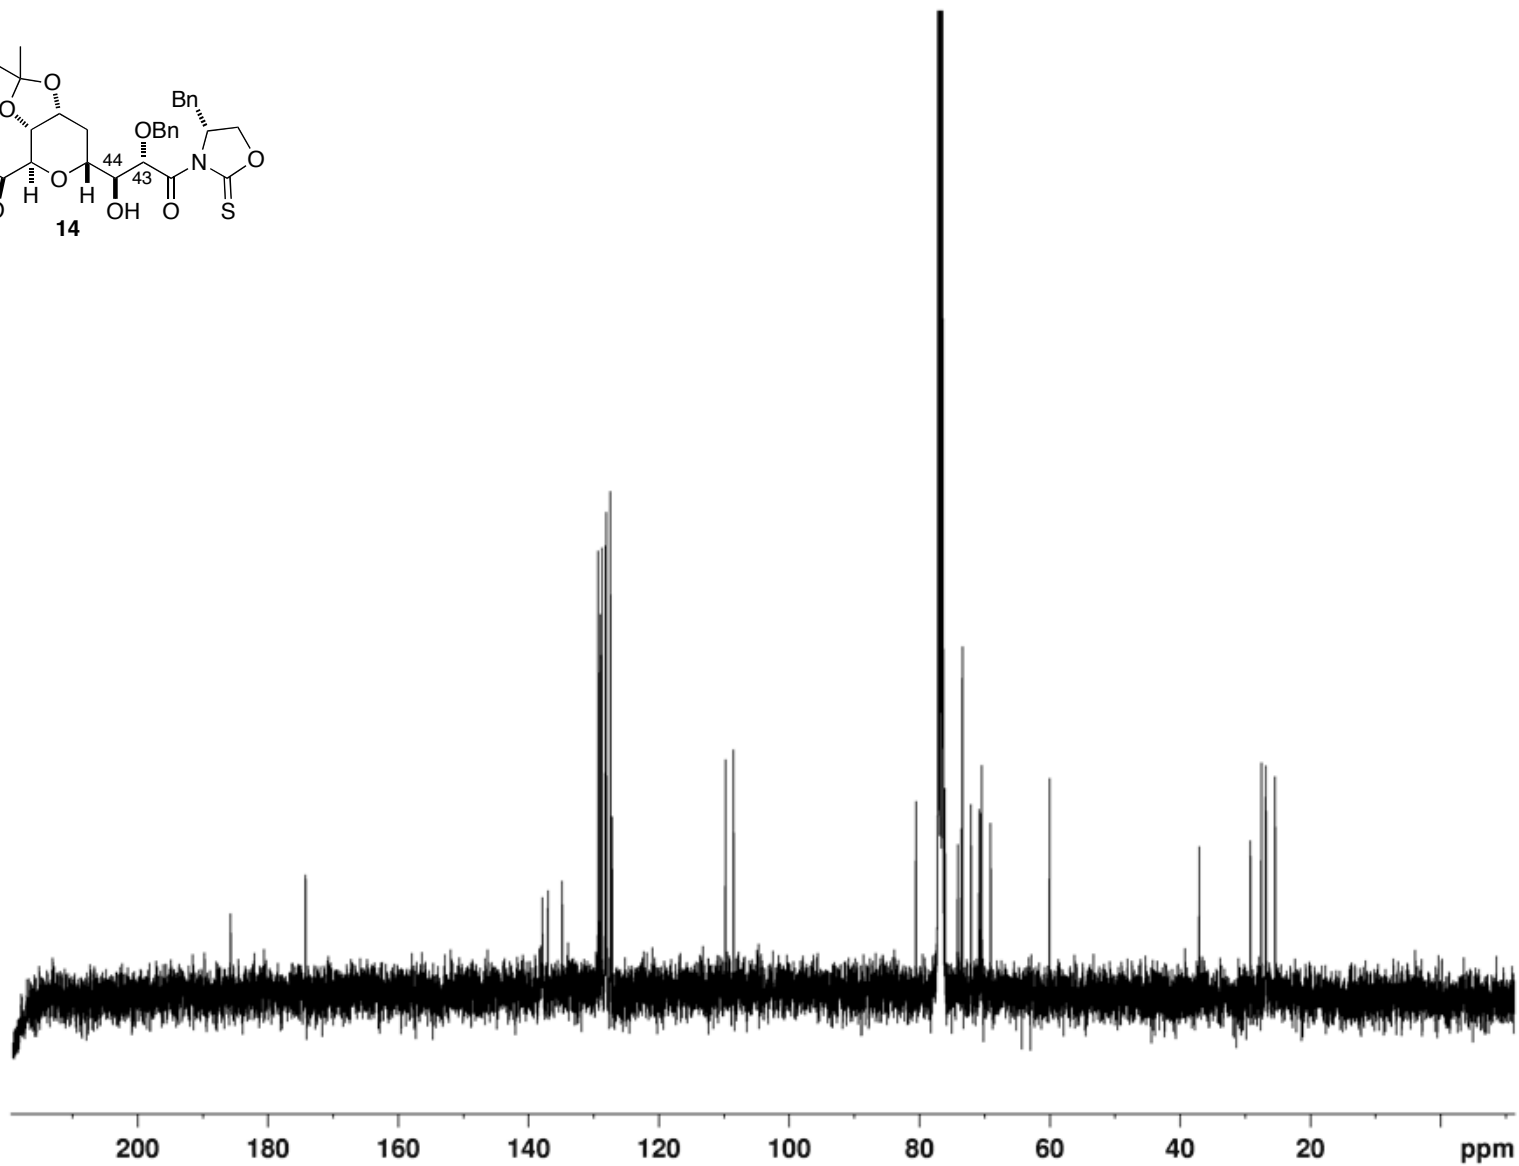

$^1\text{H}$  NMR (400 MHz) of silyl ether **15** (in  $\text{CDCl}_3$ )

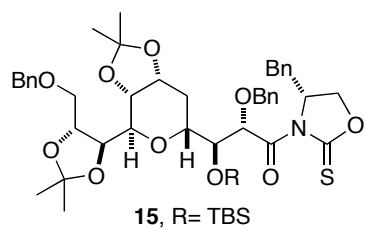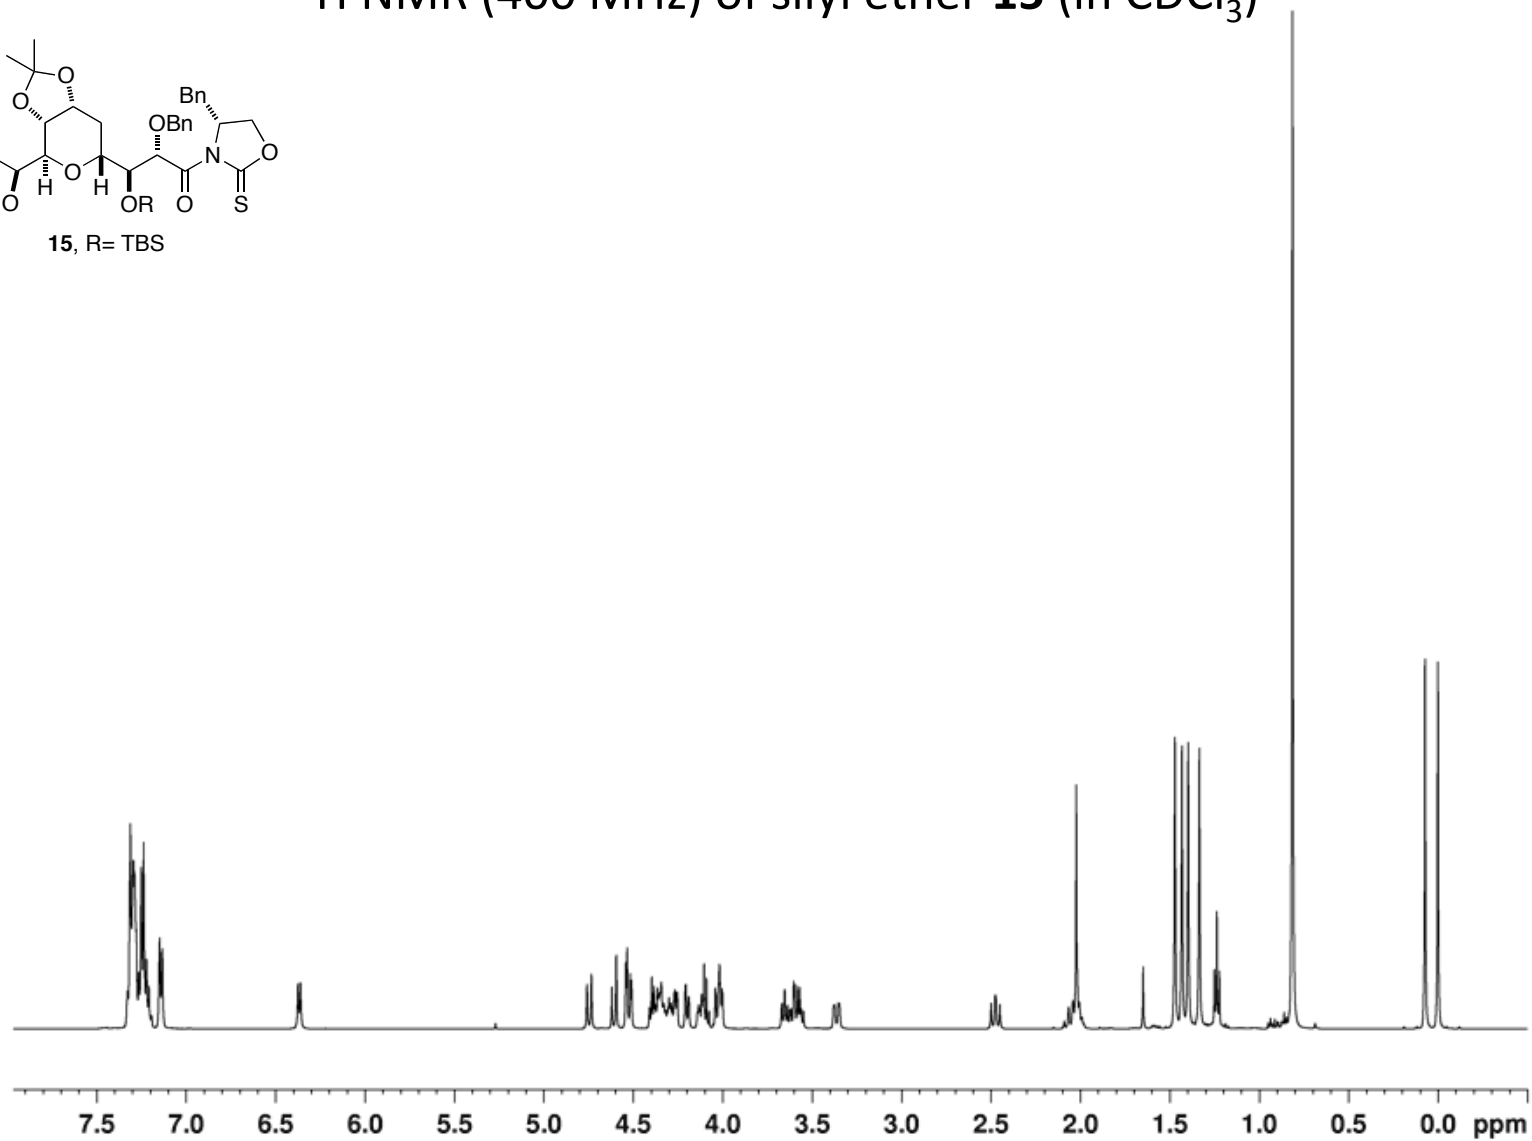

$^{13}\text{C}$  NMR (100 MHz) of silyl ether **15** (in  $\text{CDCl}_3$ )

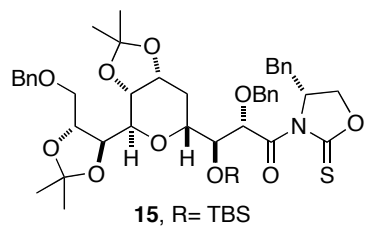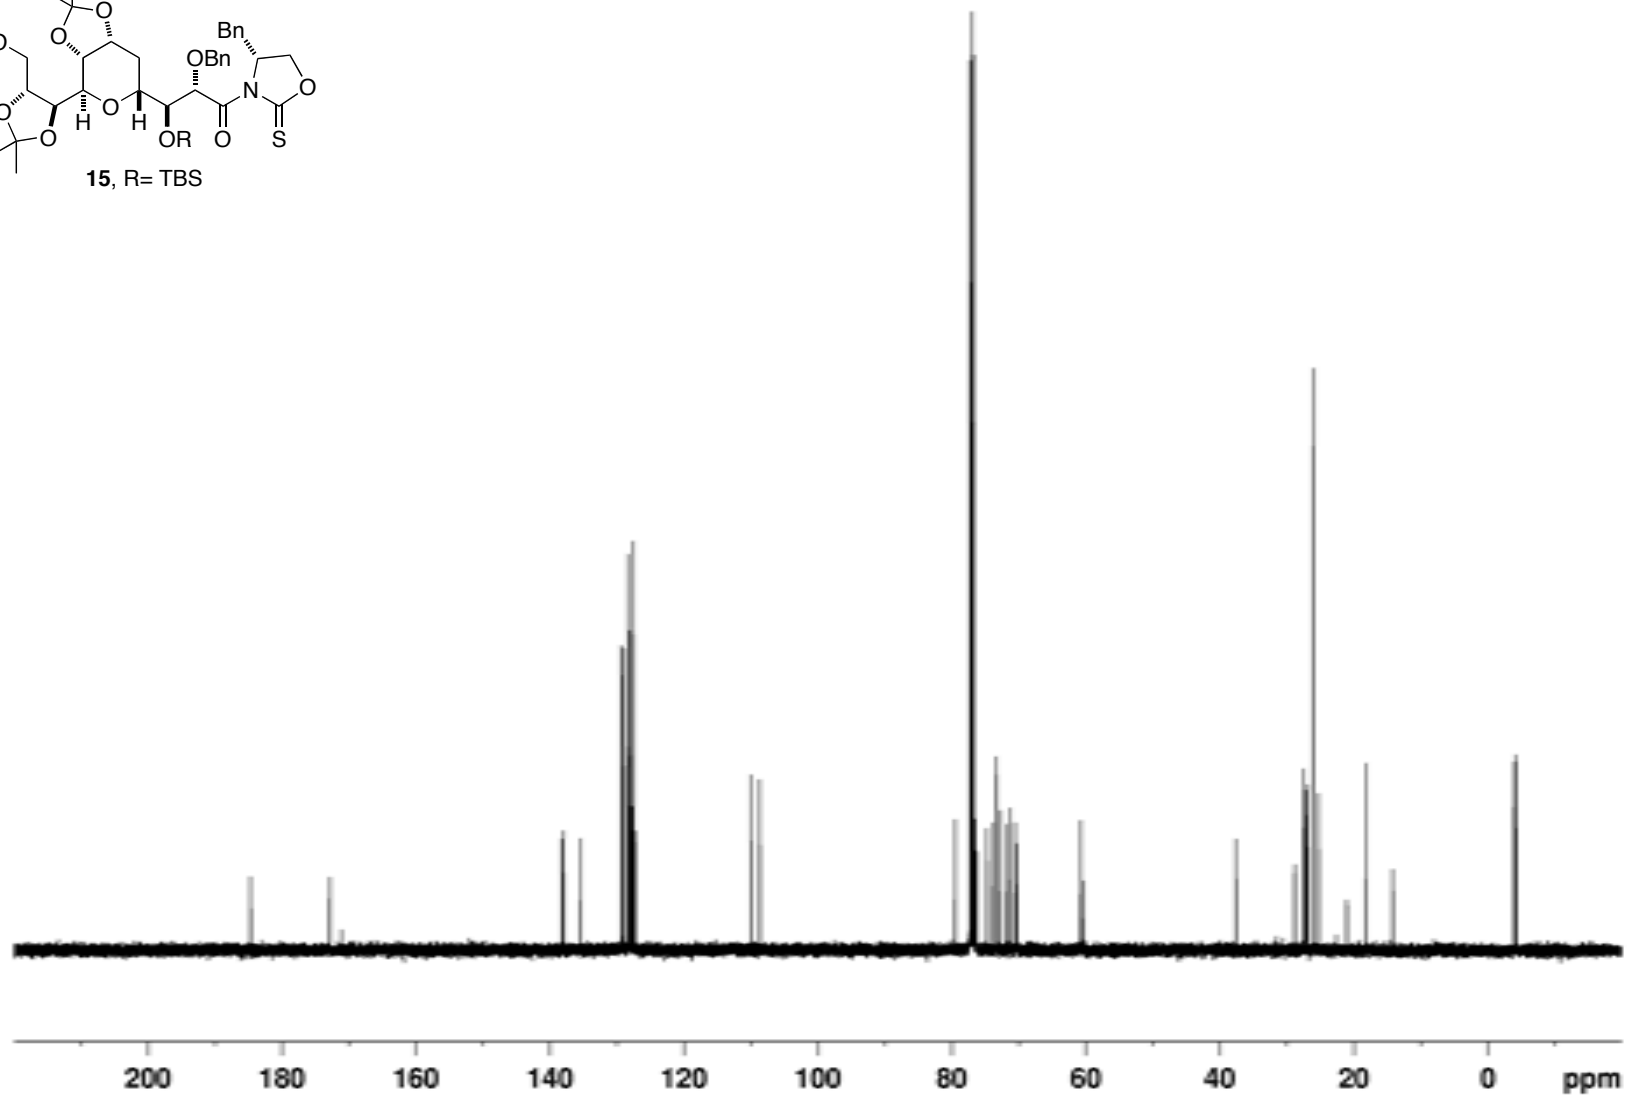

$^1\text{H}$  NMR (400 MHz) of  $\beta$ -ketophosphonate **3** (in  $\text{CDCl}_3$ )

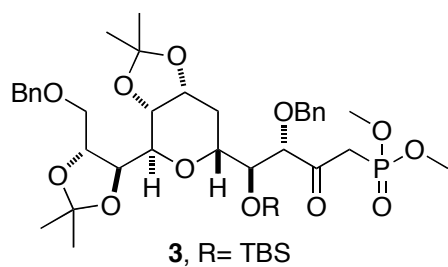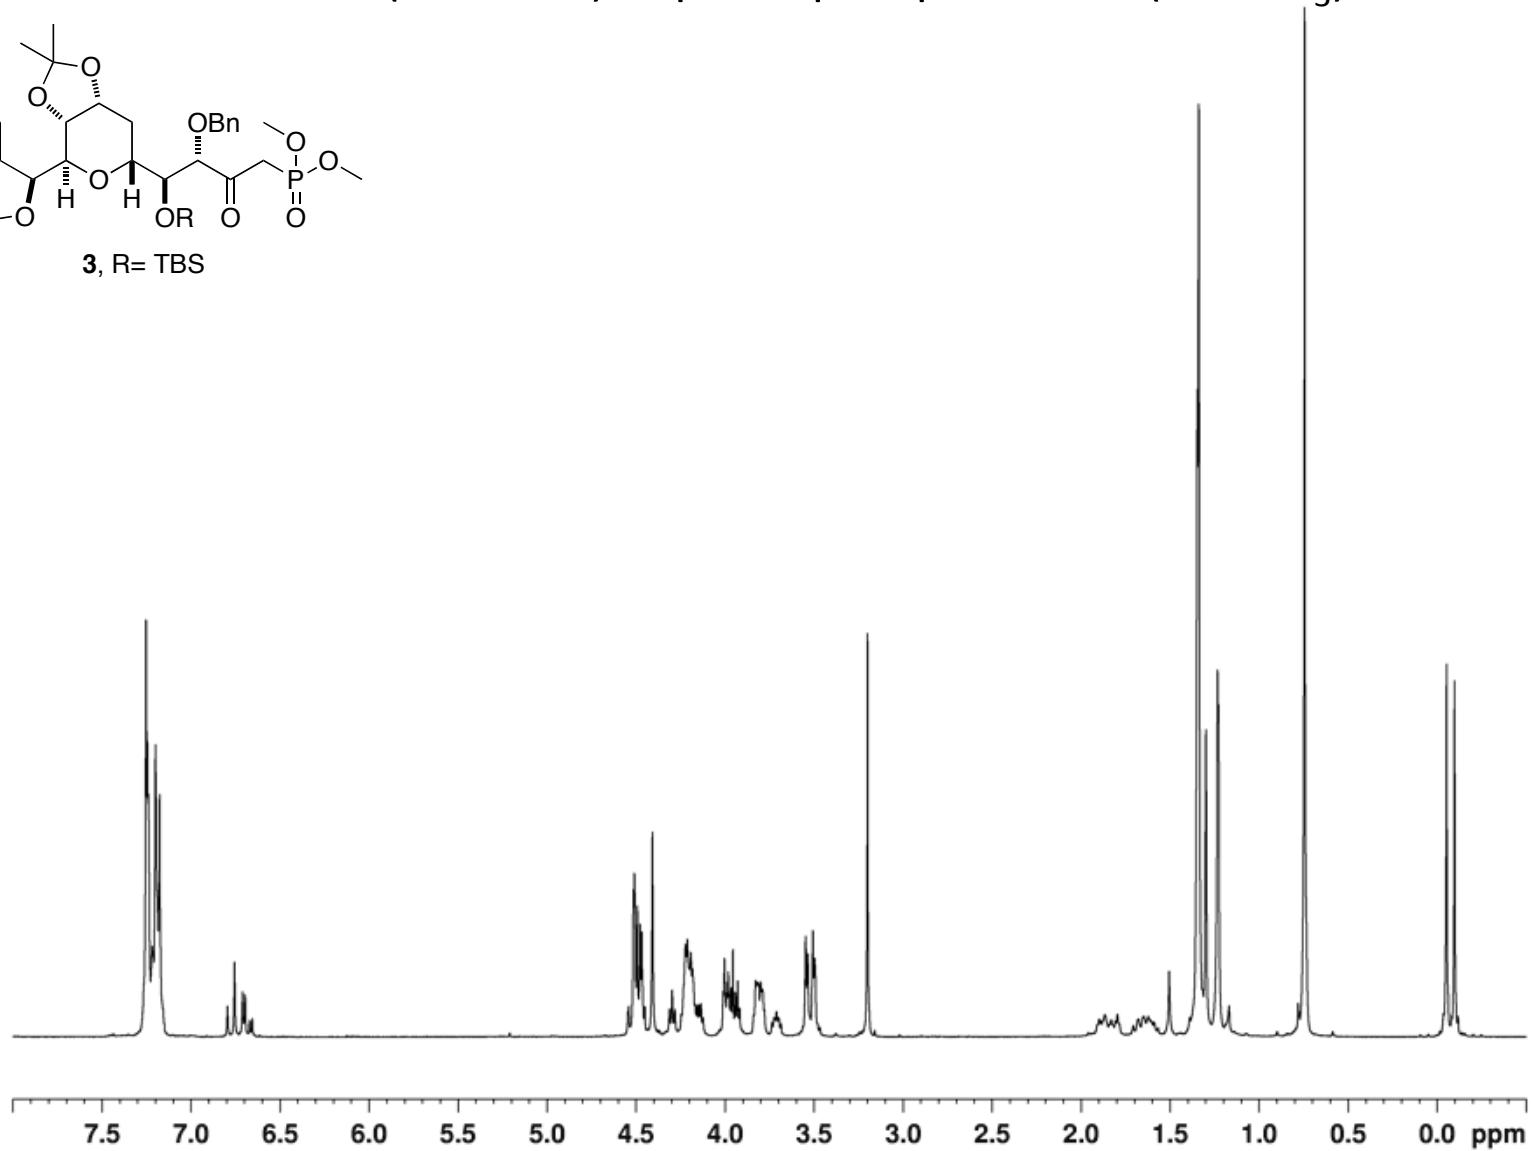

$^{13}\text{C}$  NMR (125 MHz) of  $\beta$ -ketophosphonate **3** (in  $\text{CDCl}_3$ )

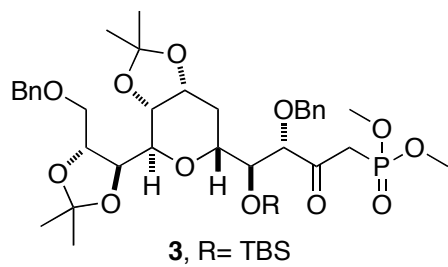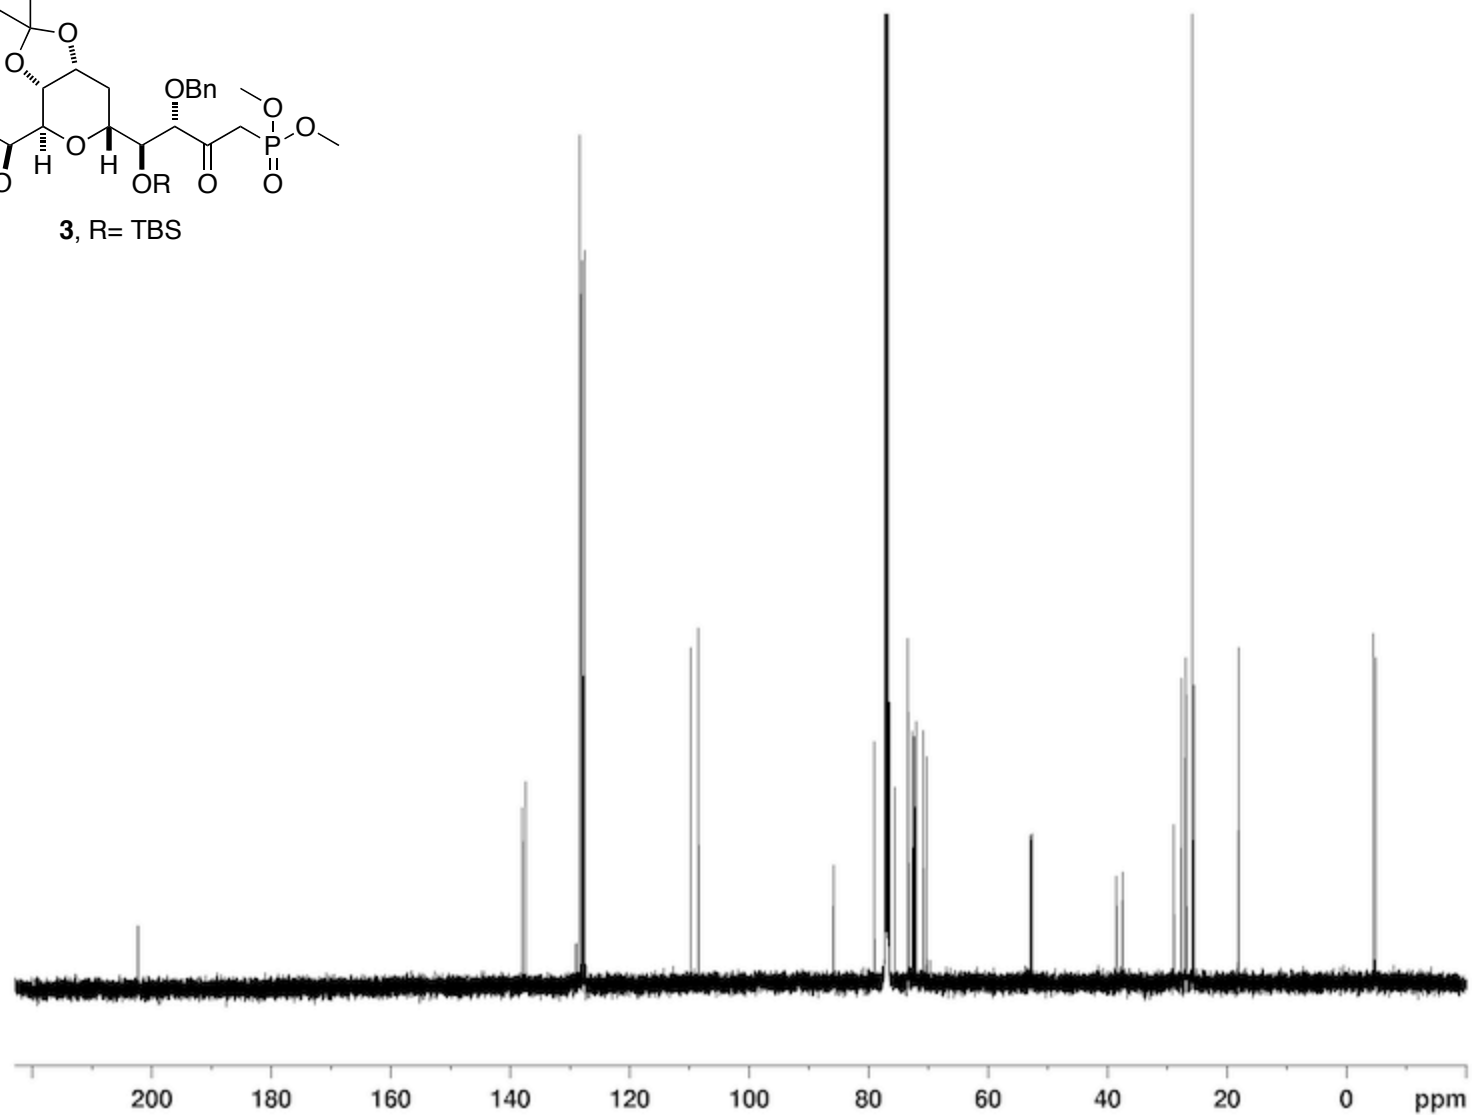

$^1\text{H}$  NMR (400 MHz) of acetate **16** (in  $\text{CDCl}_3$ )

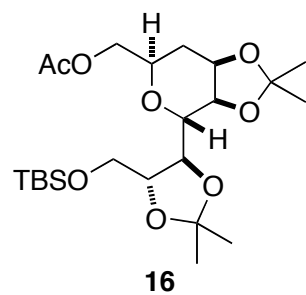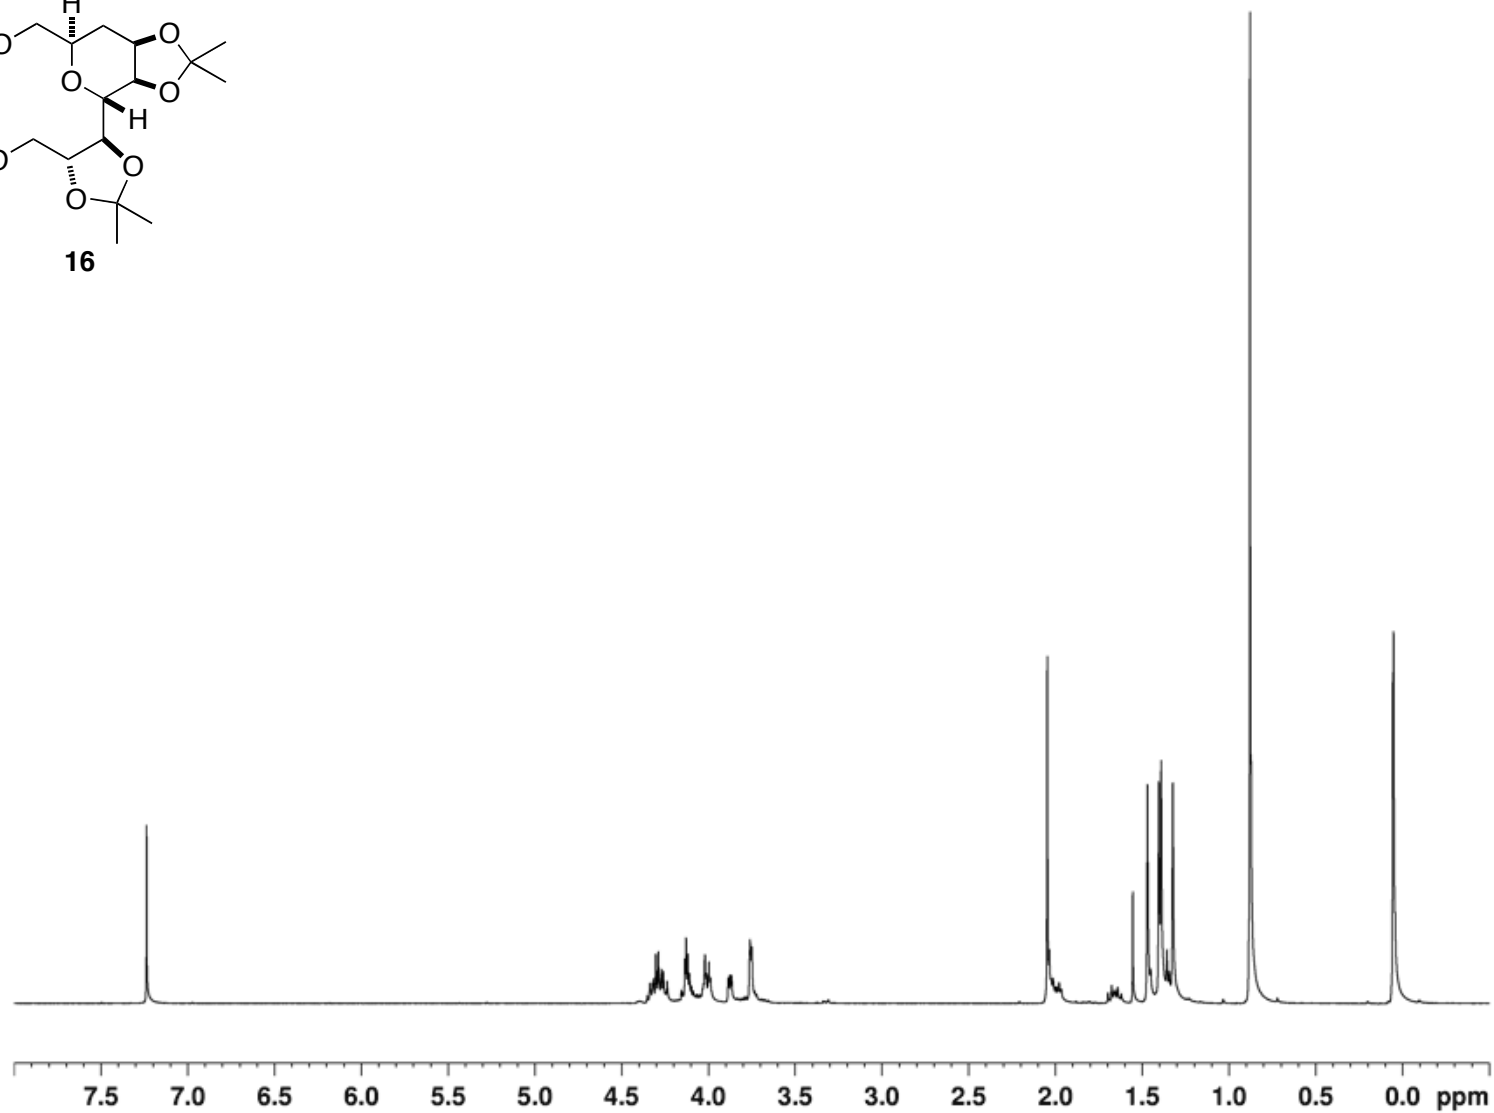



$^{13}\text{C}$  NMR (500 MHz) of acetate **16** (in  $\text{CDCl}_3$ )

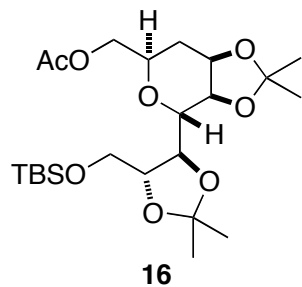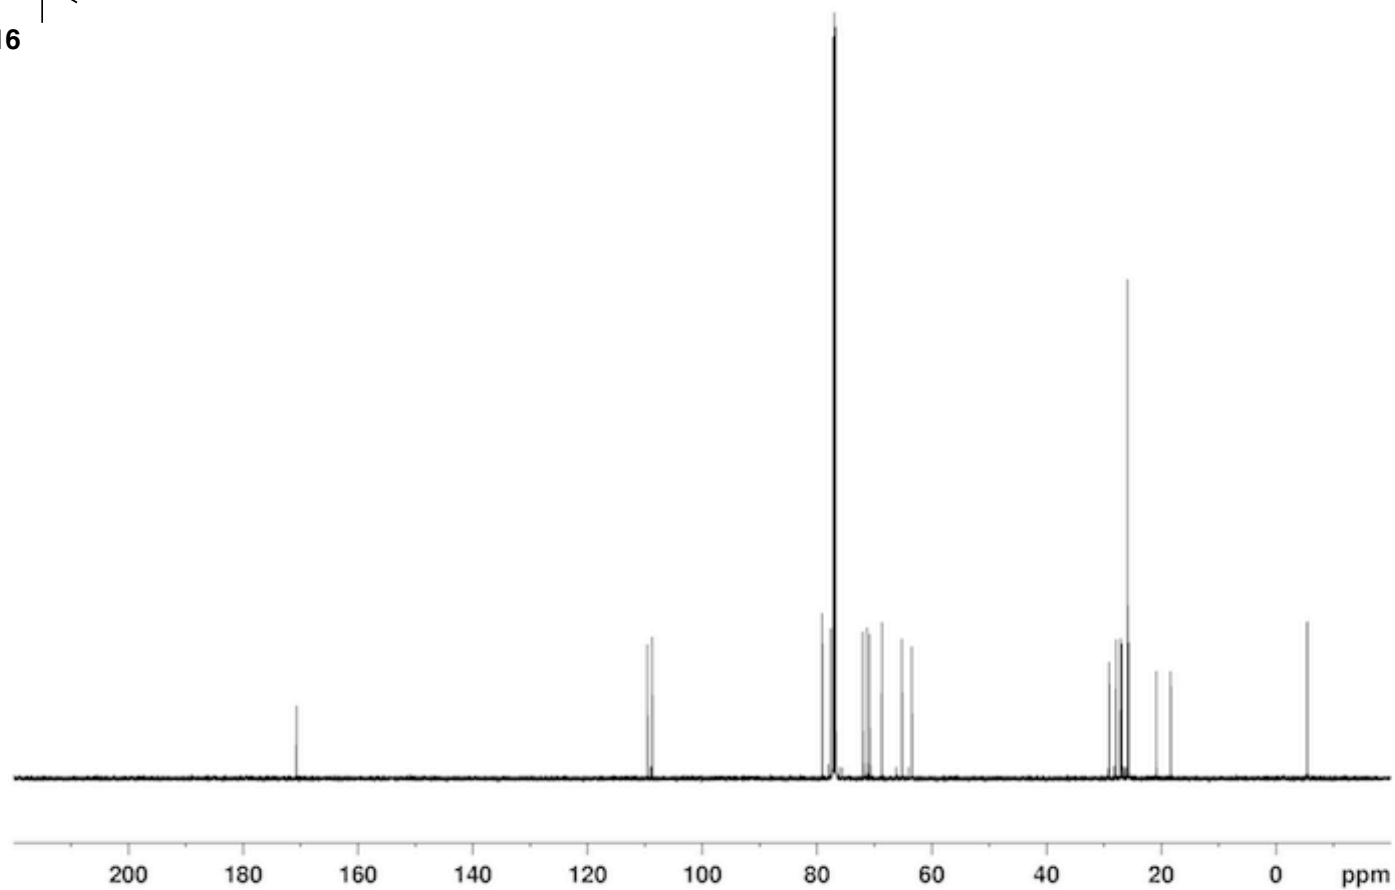

$^1\text{H}$  NMR (400 MHz) of alcohol **17** (in  $\text{CDCl}_3$ )

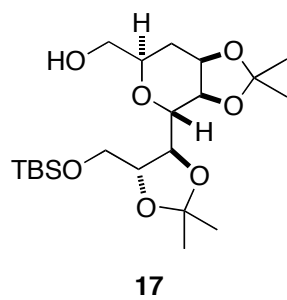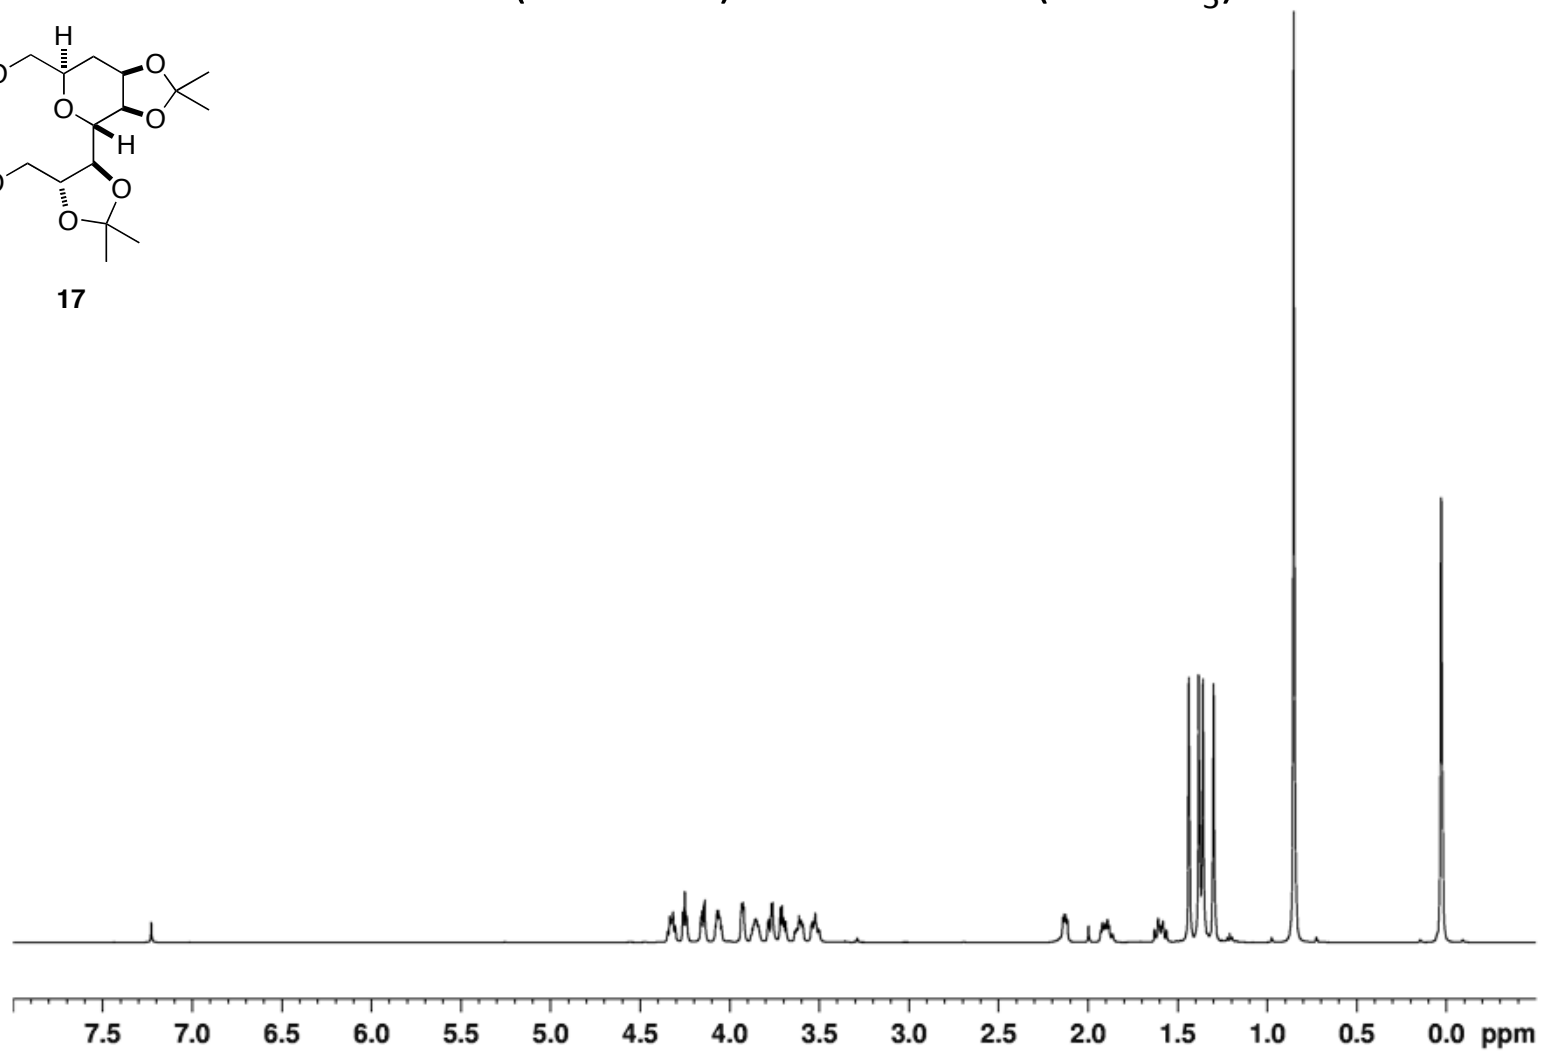

$^{13}\text{C}$  NMR (100 MHz) of alcohol **17** (in  $\text{CDCl}_3$ )

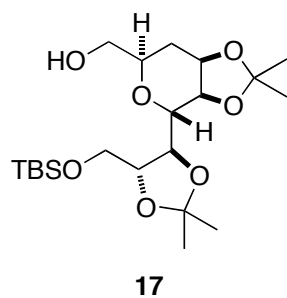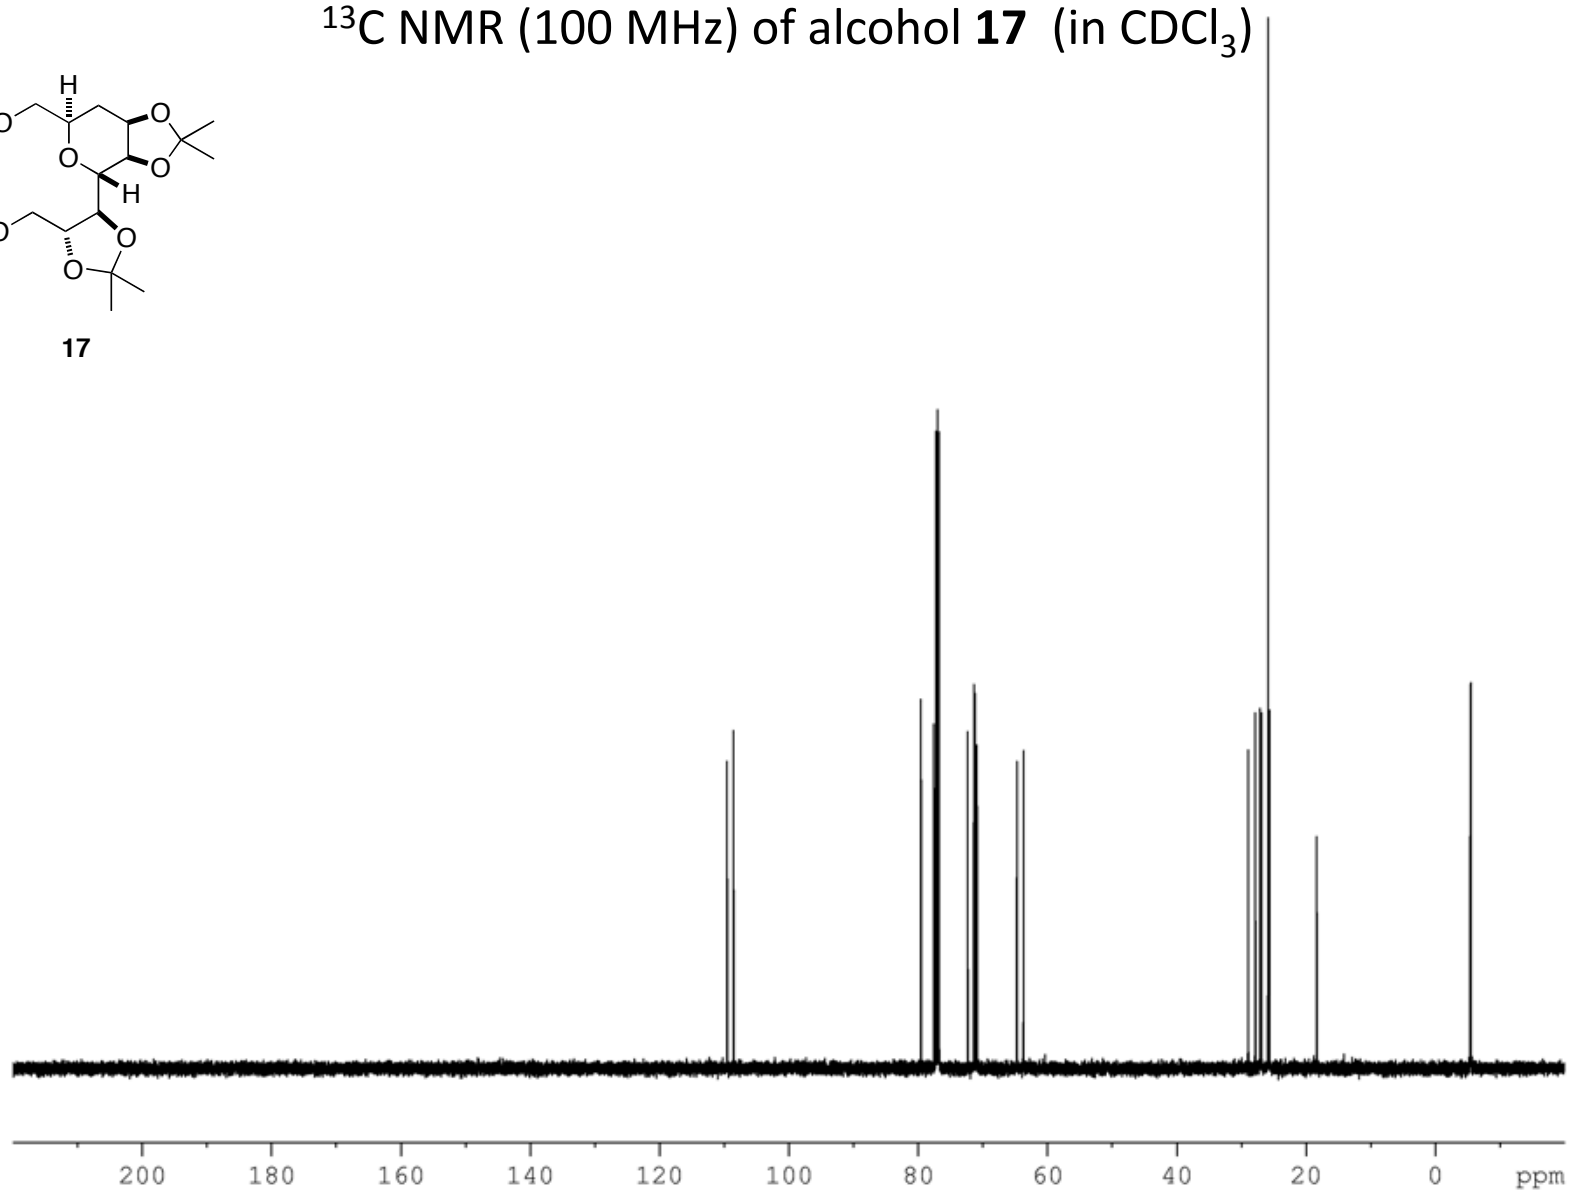

$^1\text{H}$  NMR (400 MHz) of enone **19** (in  $\text{CDCl}_3$ )

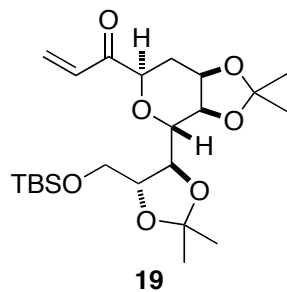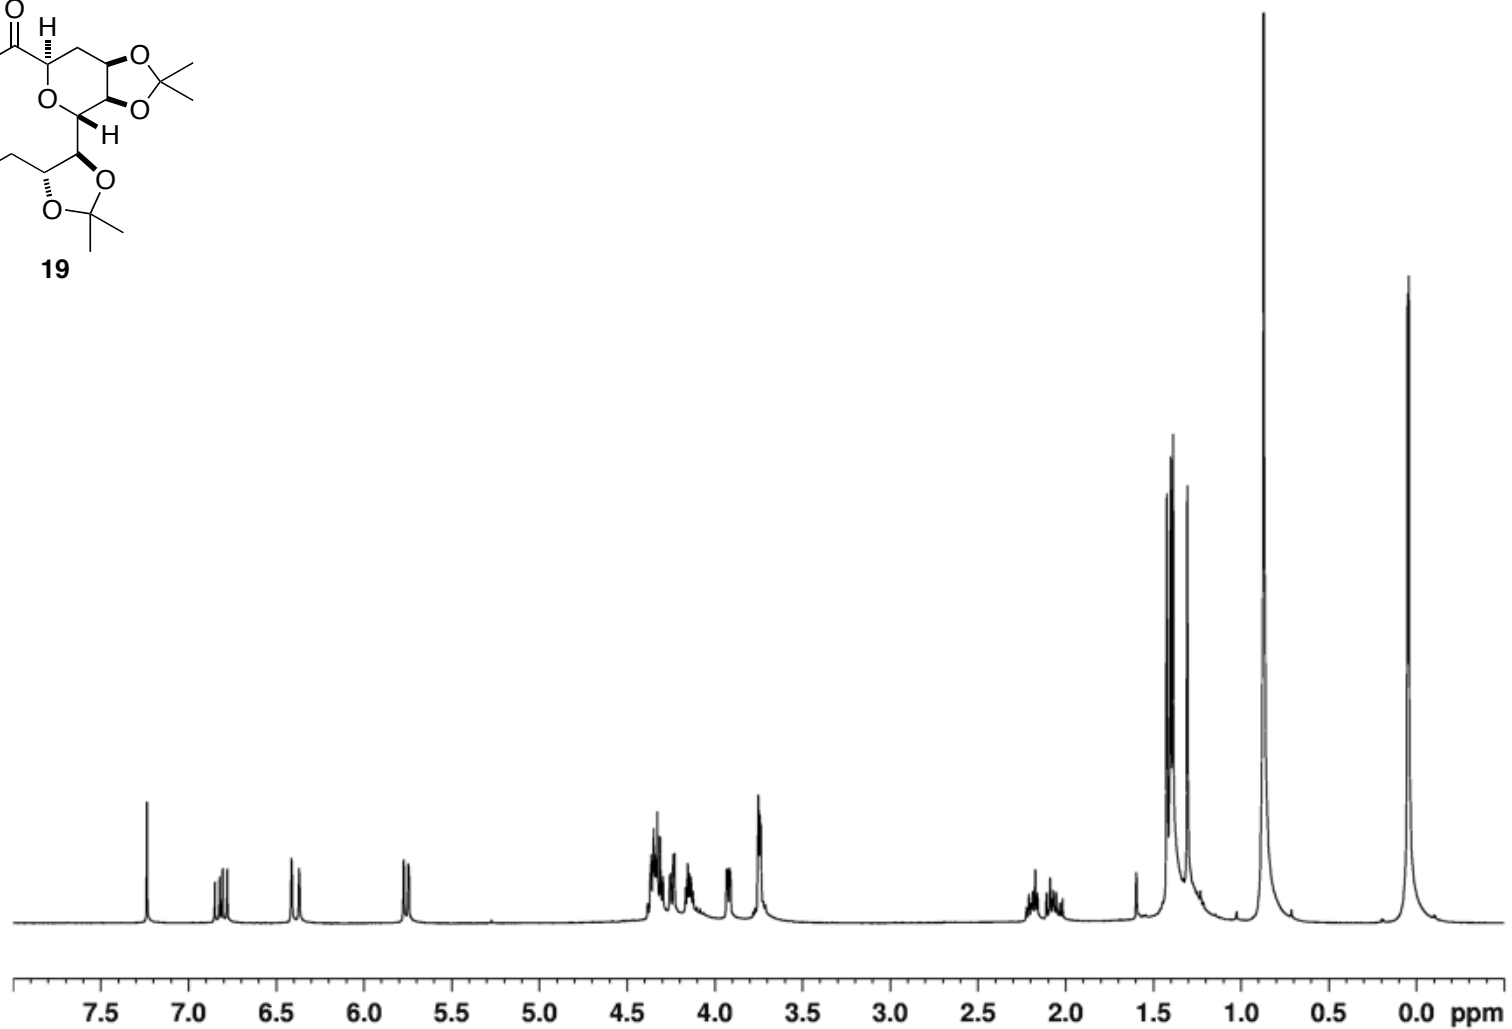

$^{13}\text{C}$  NMR (100 MHz) of enone **19** (in  $\text{CDCl}_3$ )

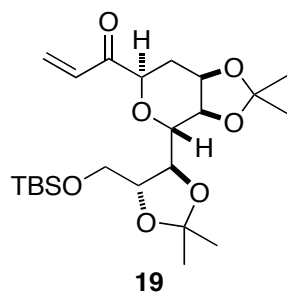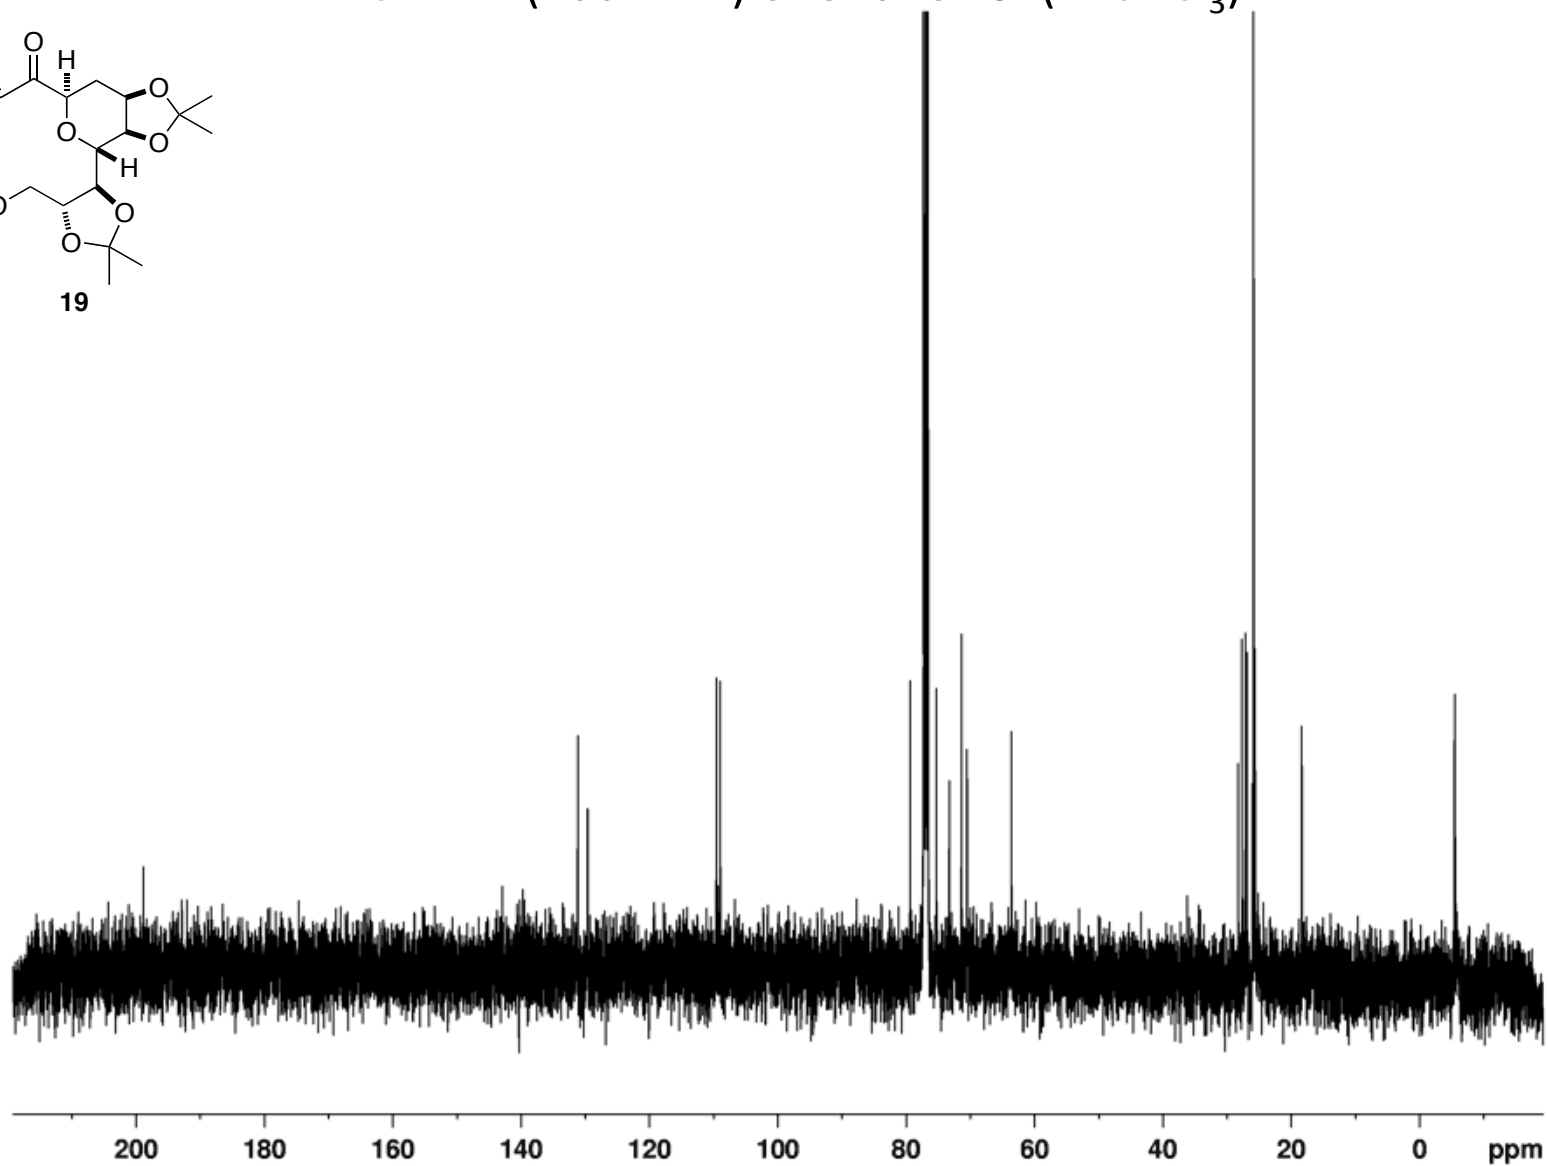

$^1\text{H}$  NMR (400 MHz) of allylic alcohol **20** (in  $\text{CDCl}_3$ )

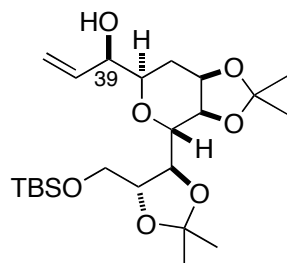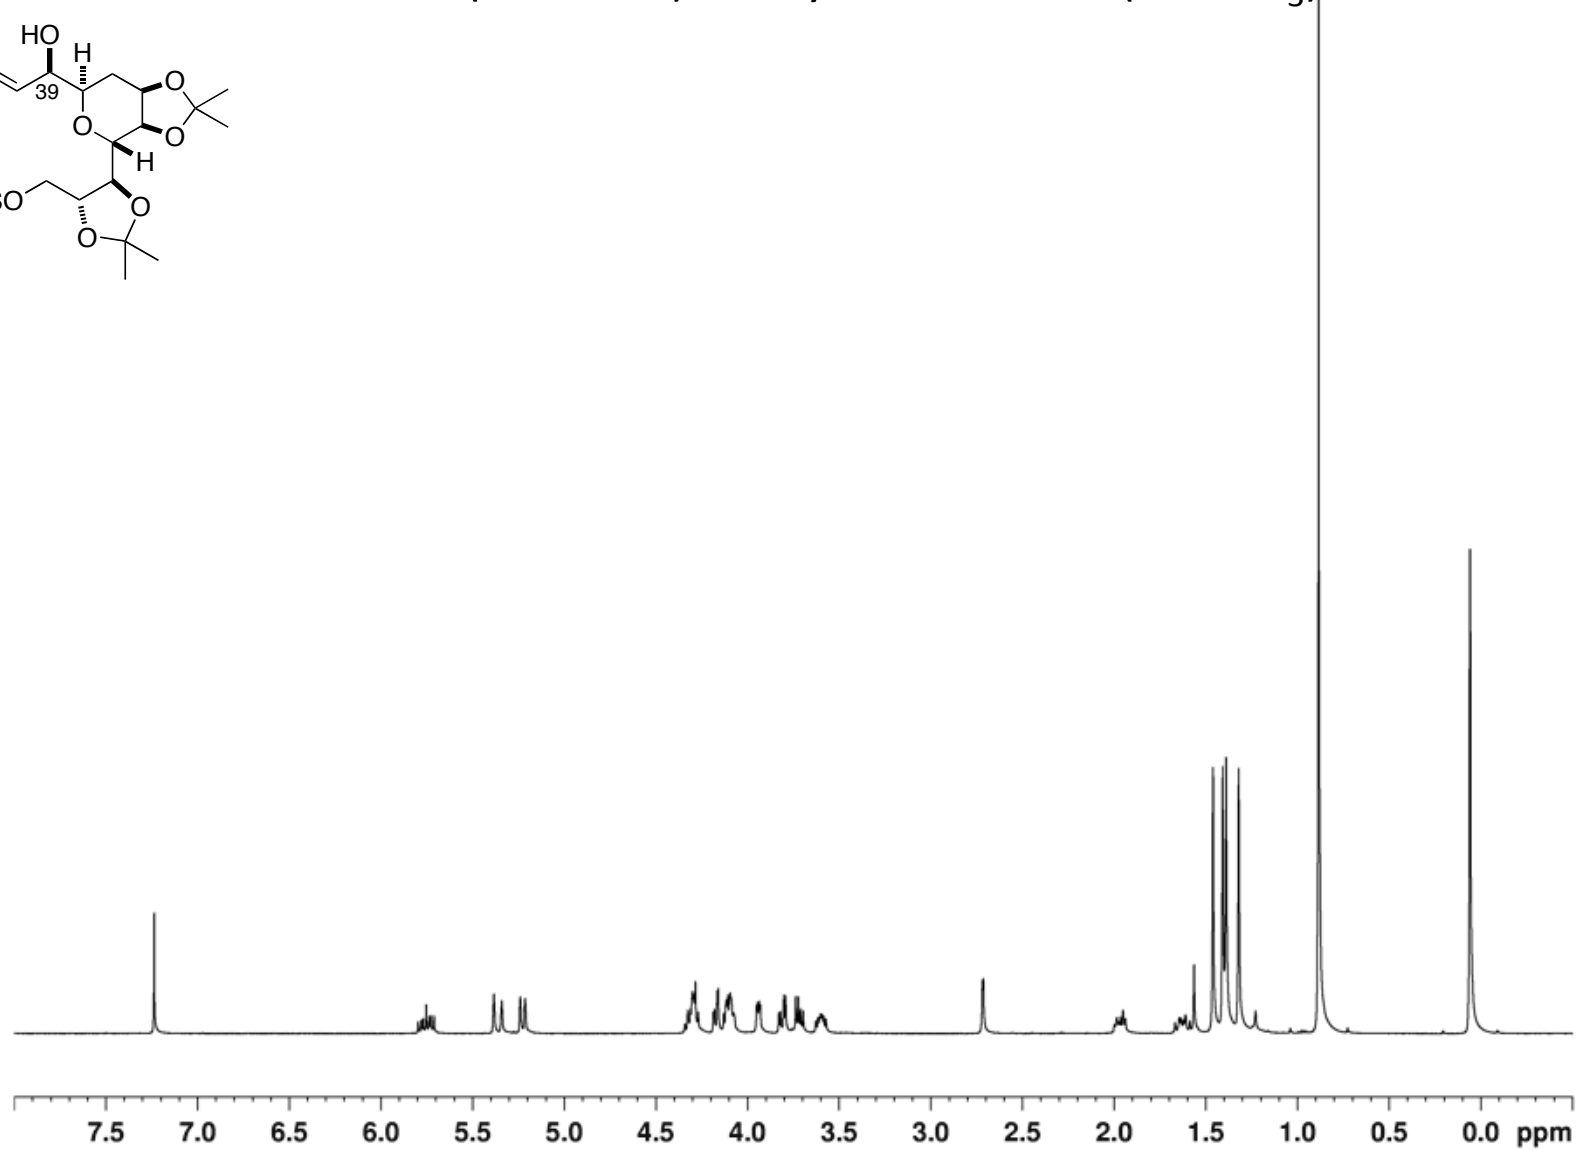

$^{13}\text{C}$  NMR (100 MHz) of allylic alcohol **20** (in  $\text{CDCl}_3$ )

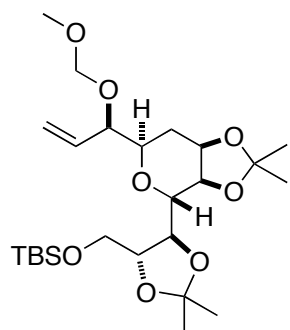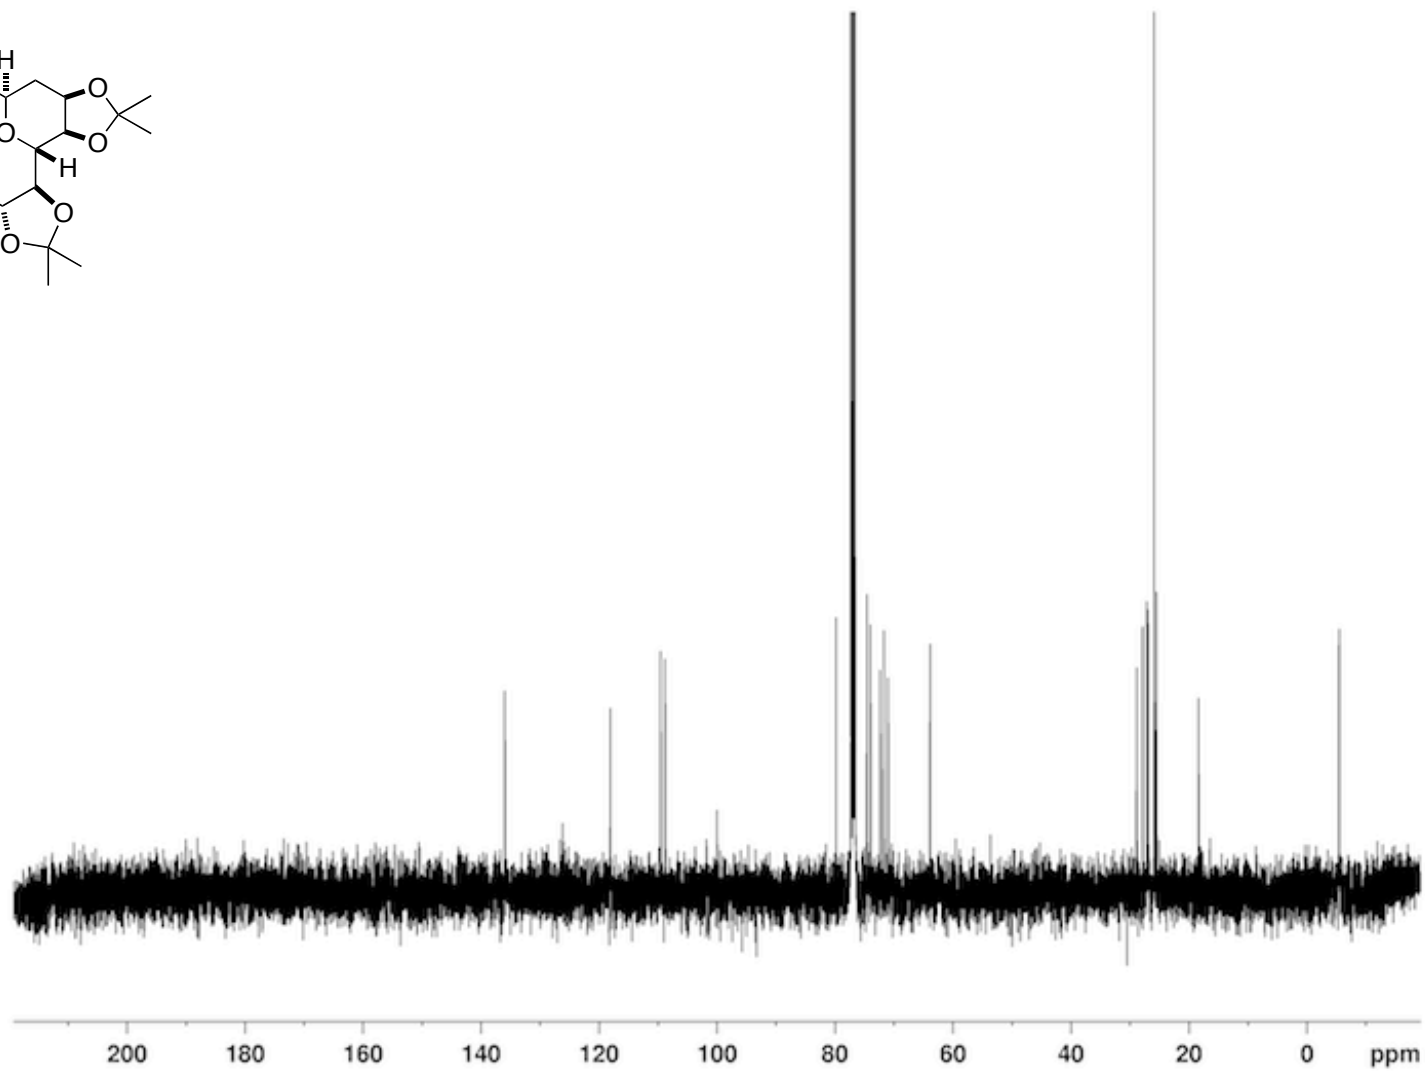

$^1\text{H}$  NMR (400 MHz) of alkene **21** (in  $\text{CDCl}_3$ )

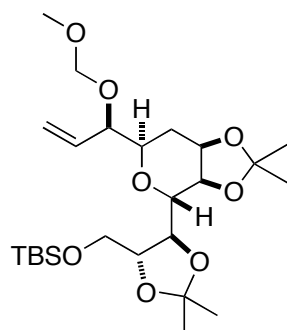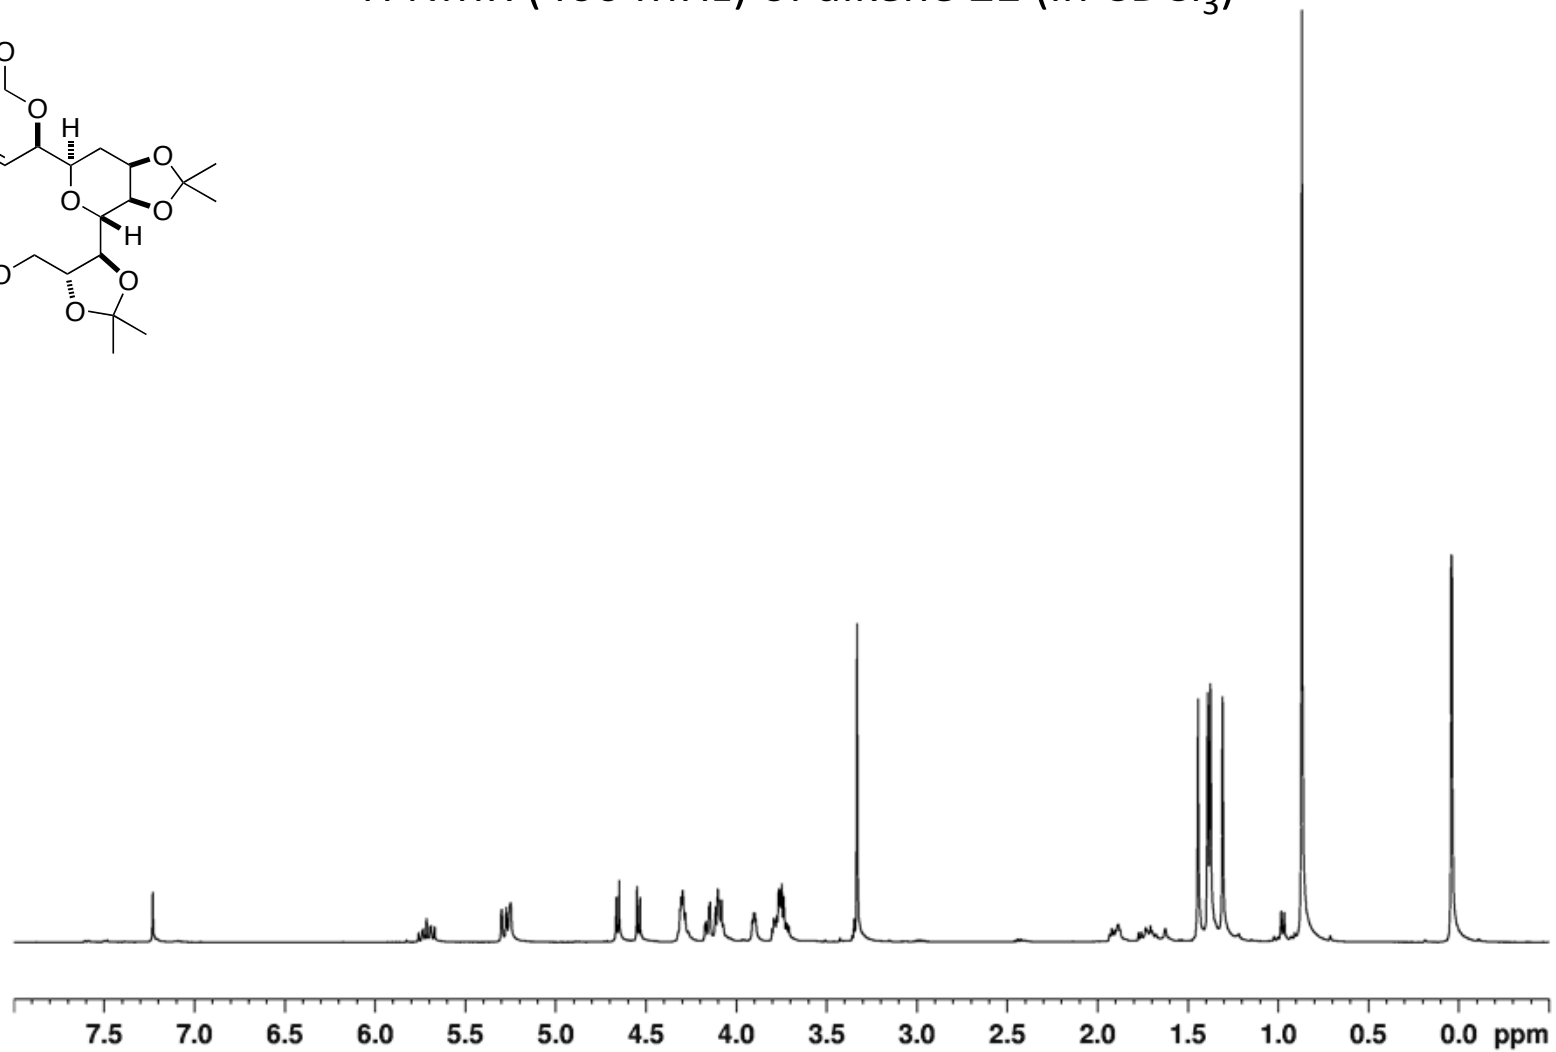



$^{13}\text{C}$  NMR (100 MHz) of alkene **21** (in  $\text{CDCl}_3$ )

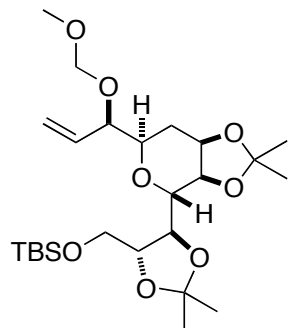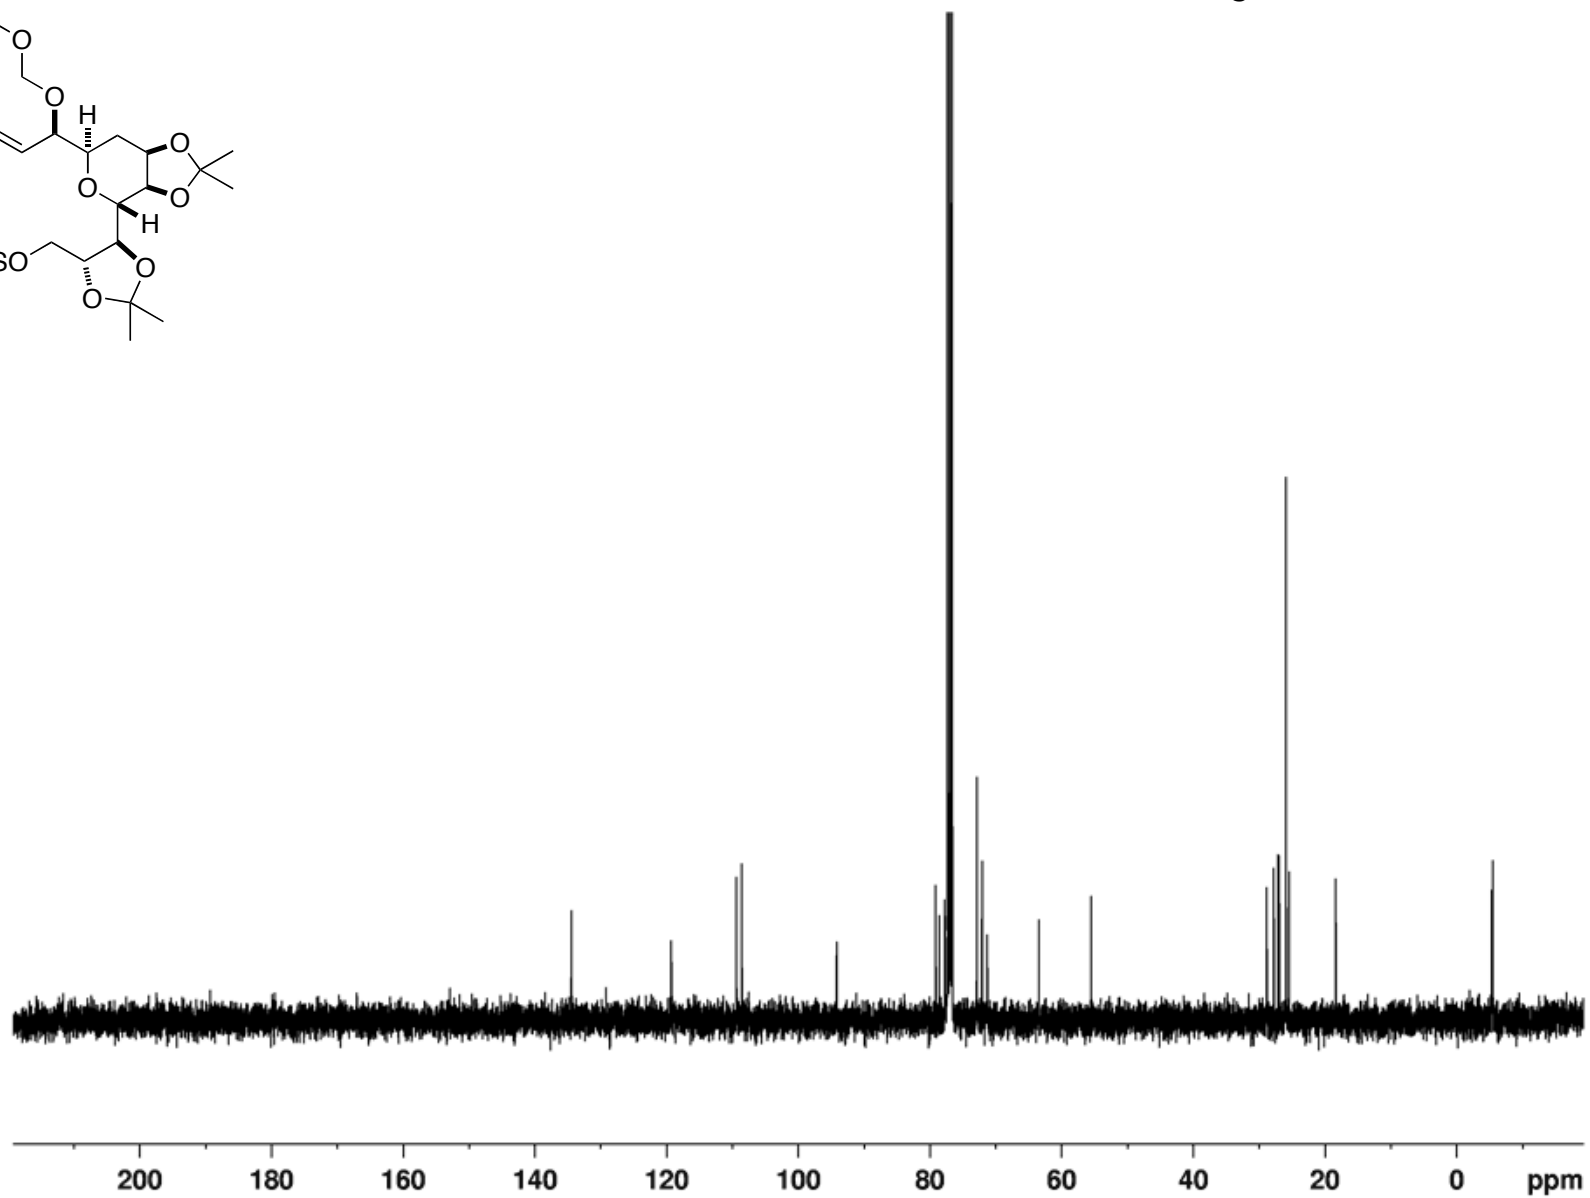

$^1\text{H}$  NMR (500 MHz) of aldehyde **4** (in  $\text{CDCl}_3$ )

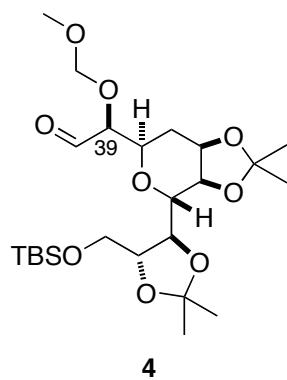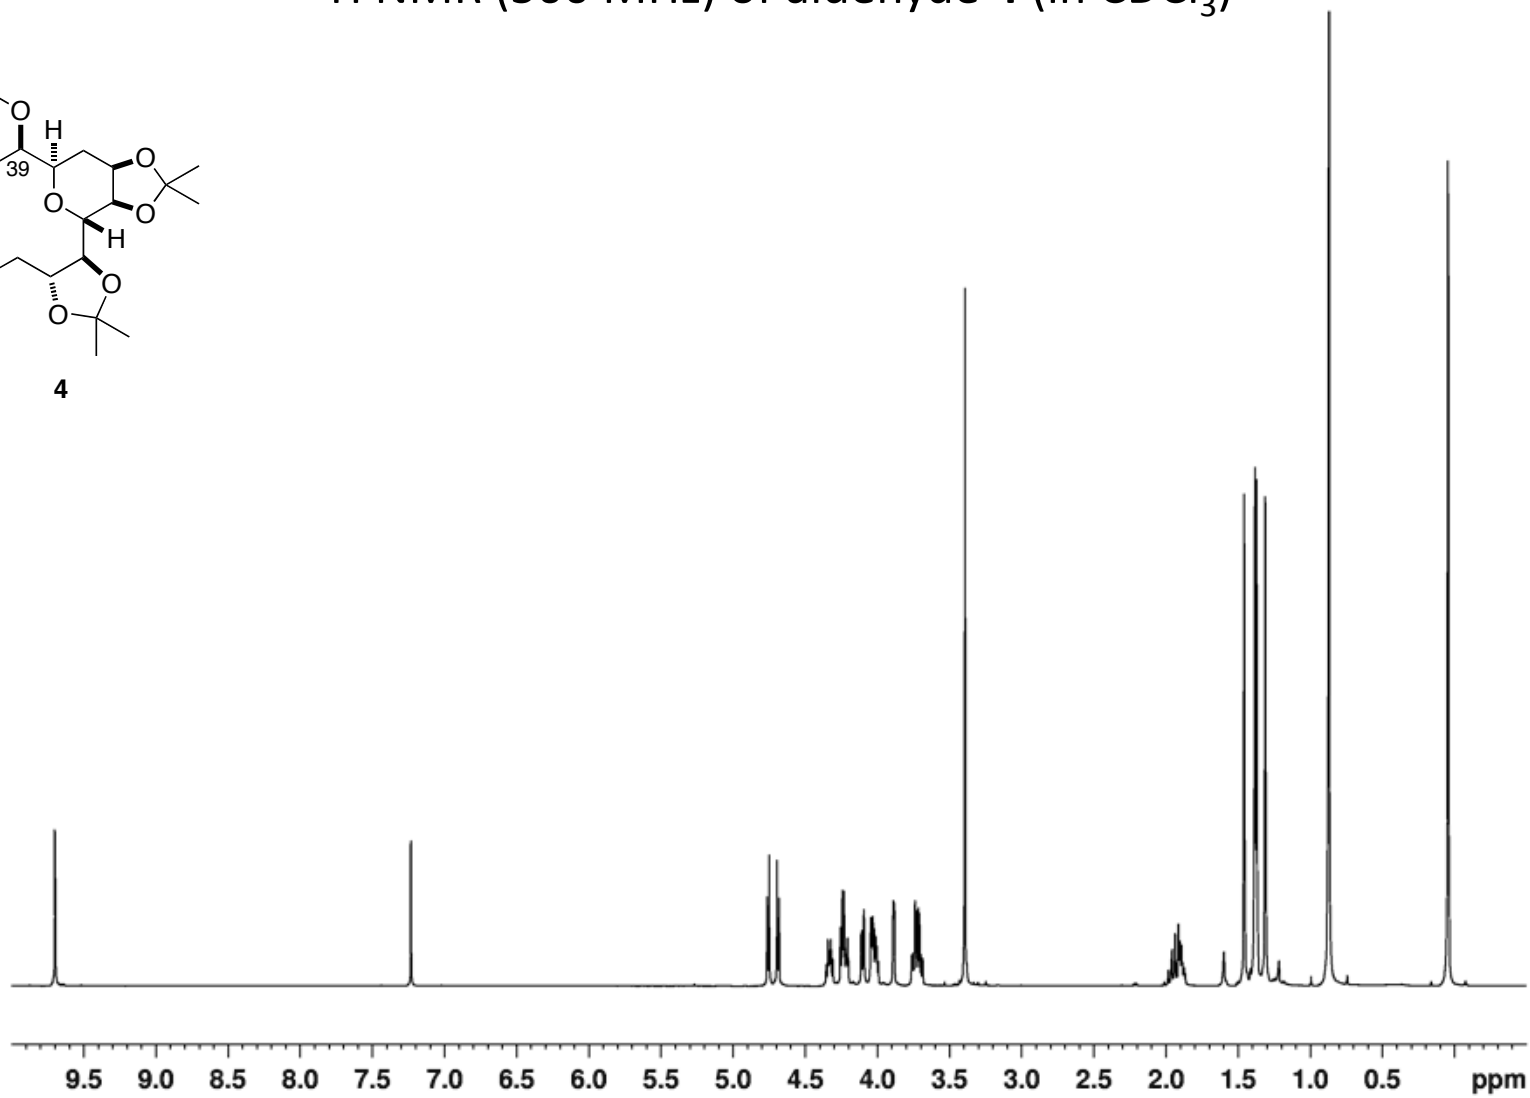

$^{13}\text{C}$  NMR (125 MHz) of aldehyde **4** (in  $\text{CDCl}_3$ )

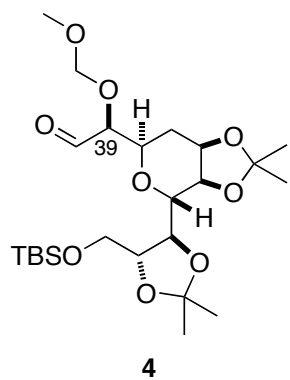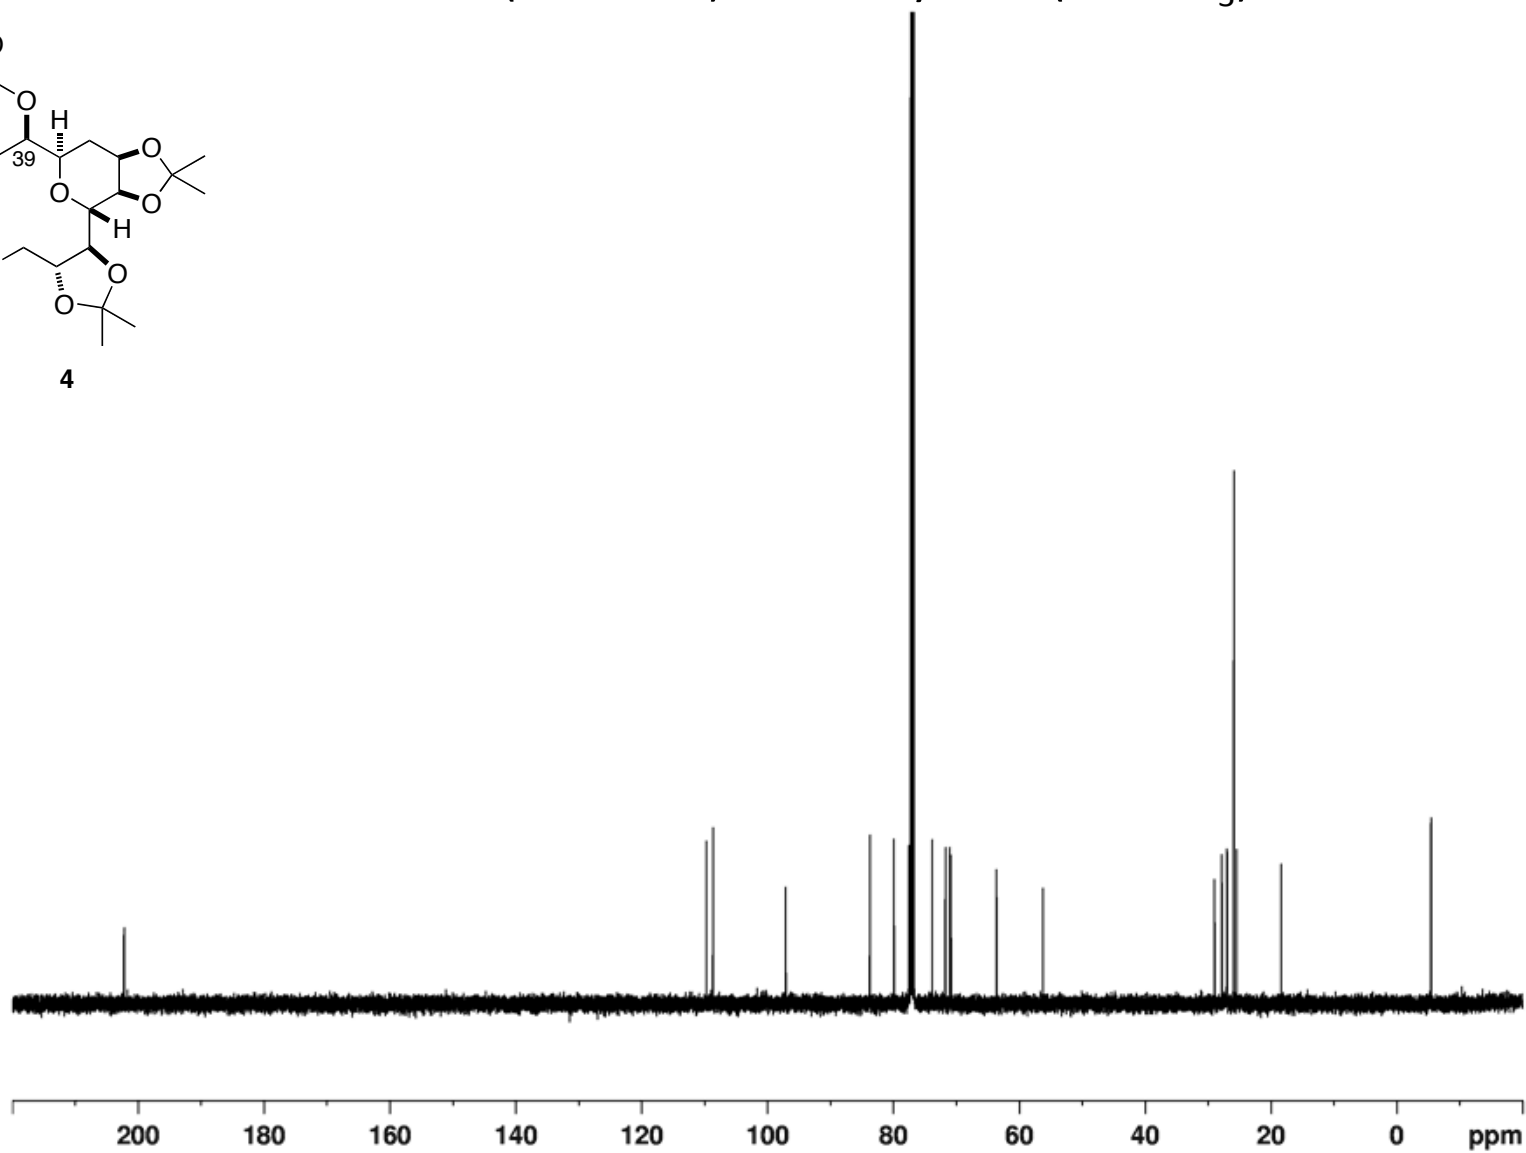

$^1\text{H}$  NMR (500 MHz) of enone **22** (in  $\text{CDCl}_3$ )

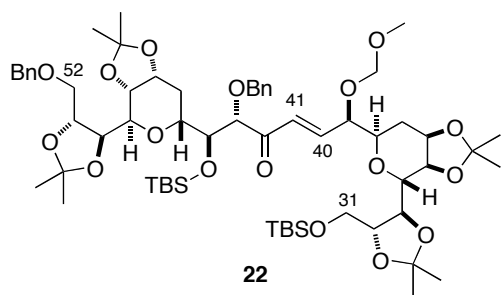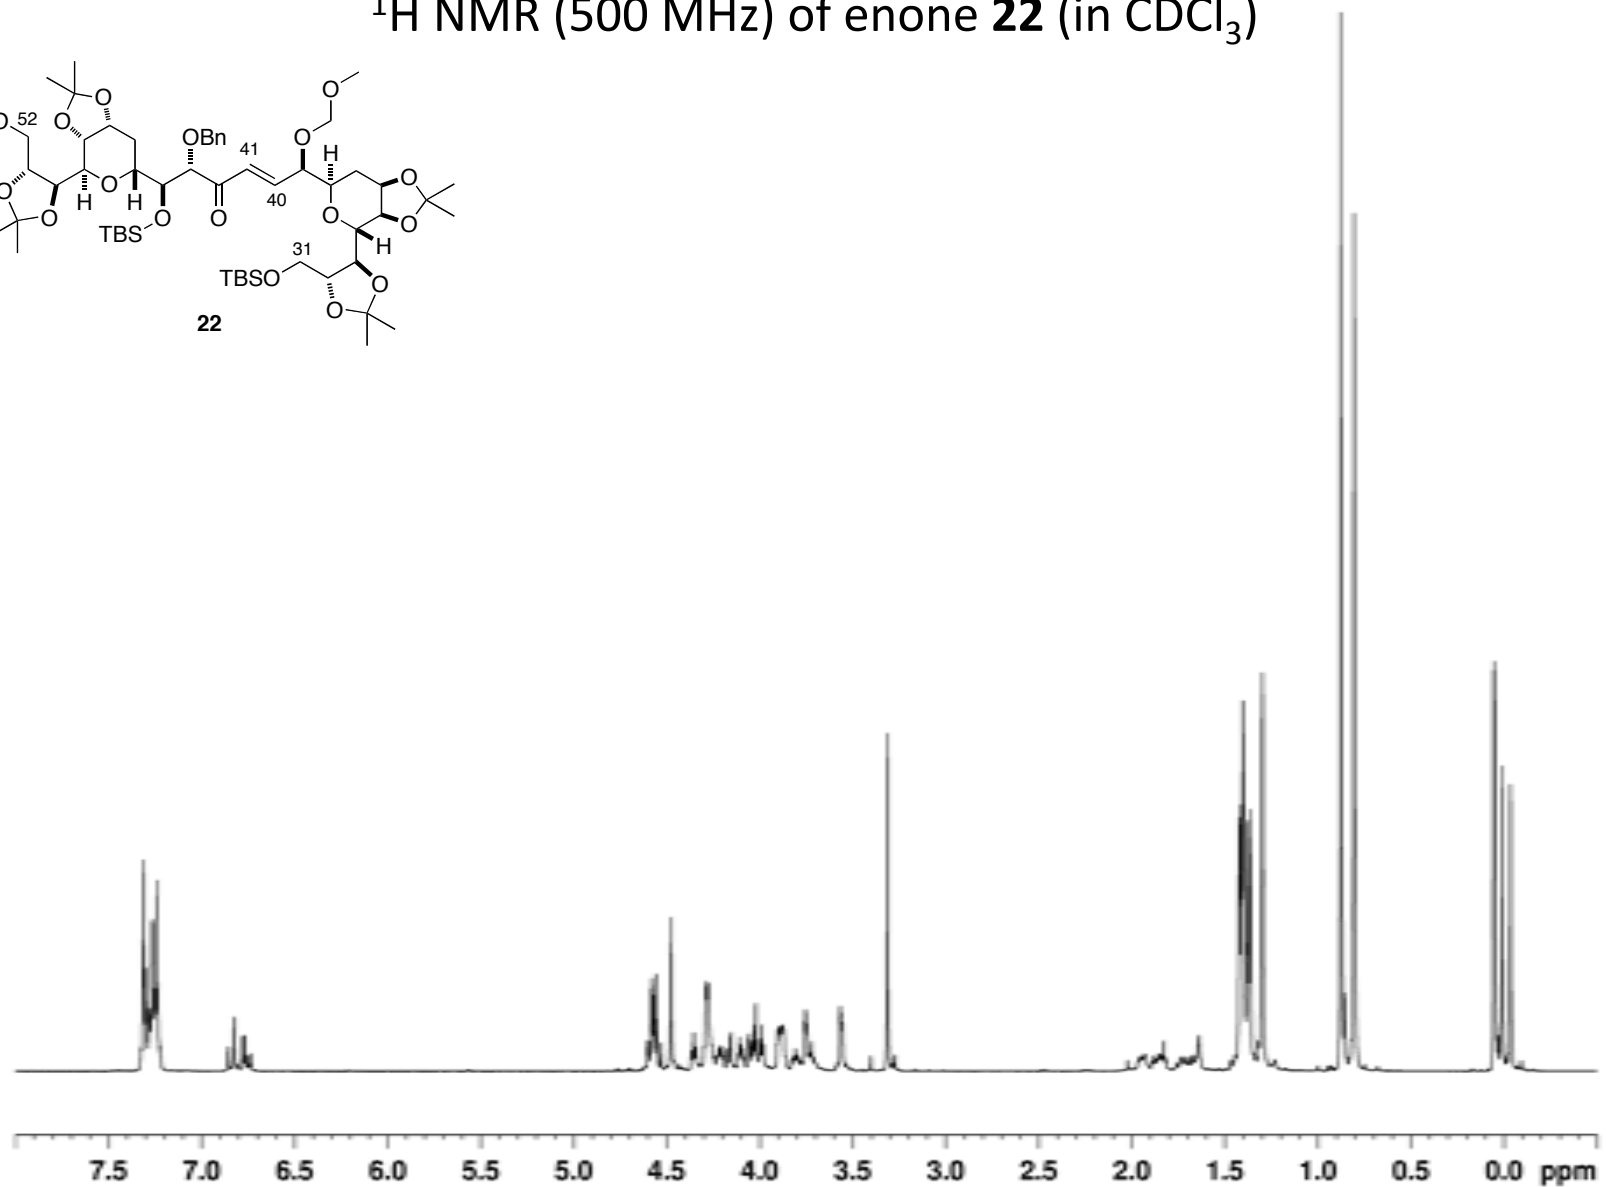

$^{13}\text{C}$  NMR (125 MHz) of enone **22** (in  $\text{CDCl}_3$ )

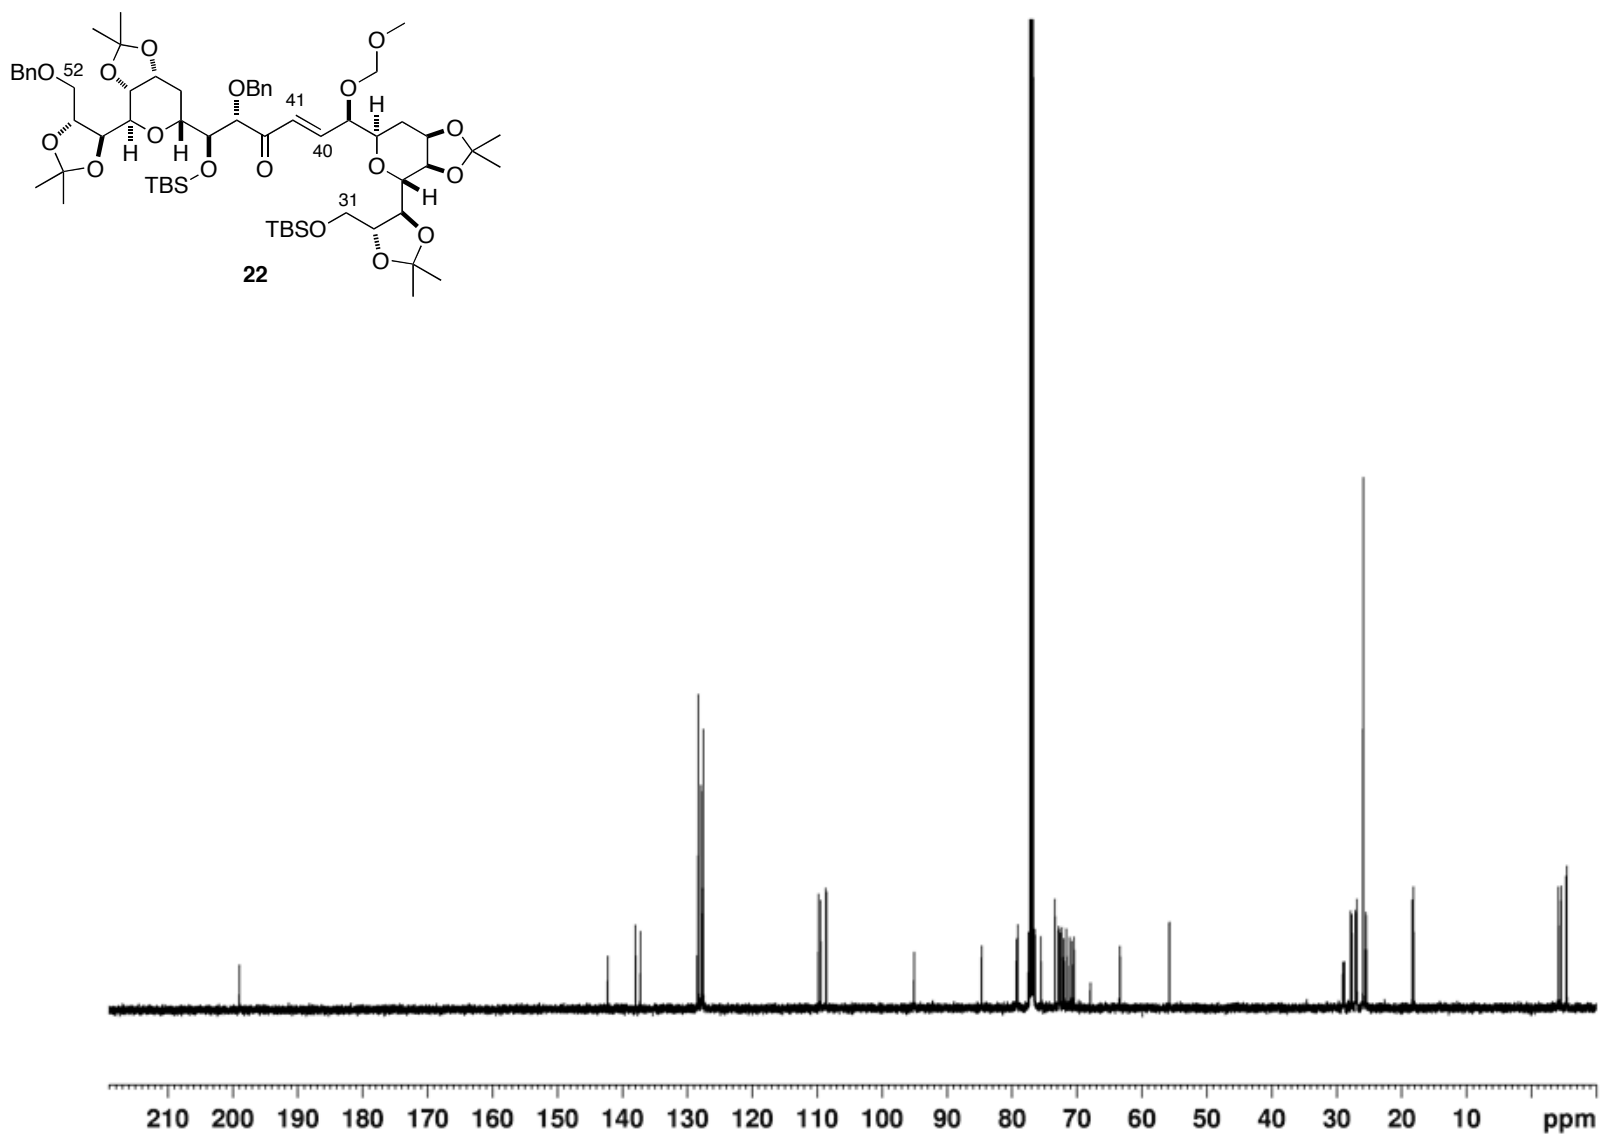

$^1\text{H}$  NMR (500 MHz) of ketone **23** (in  $\text{CDCl}_3$ )

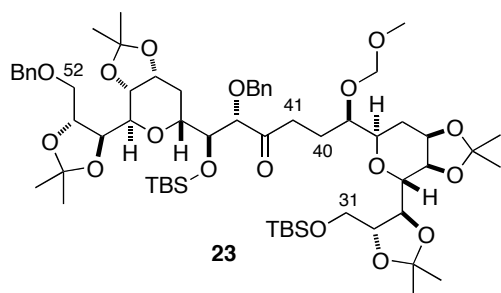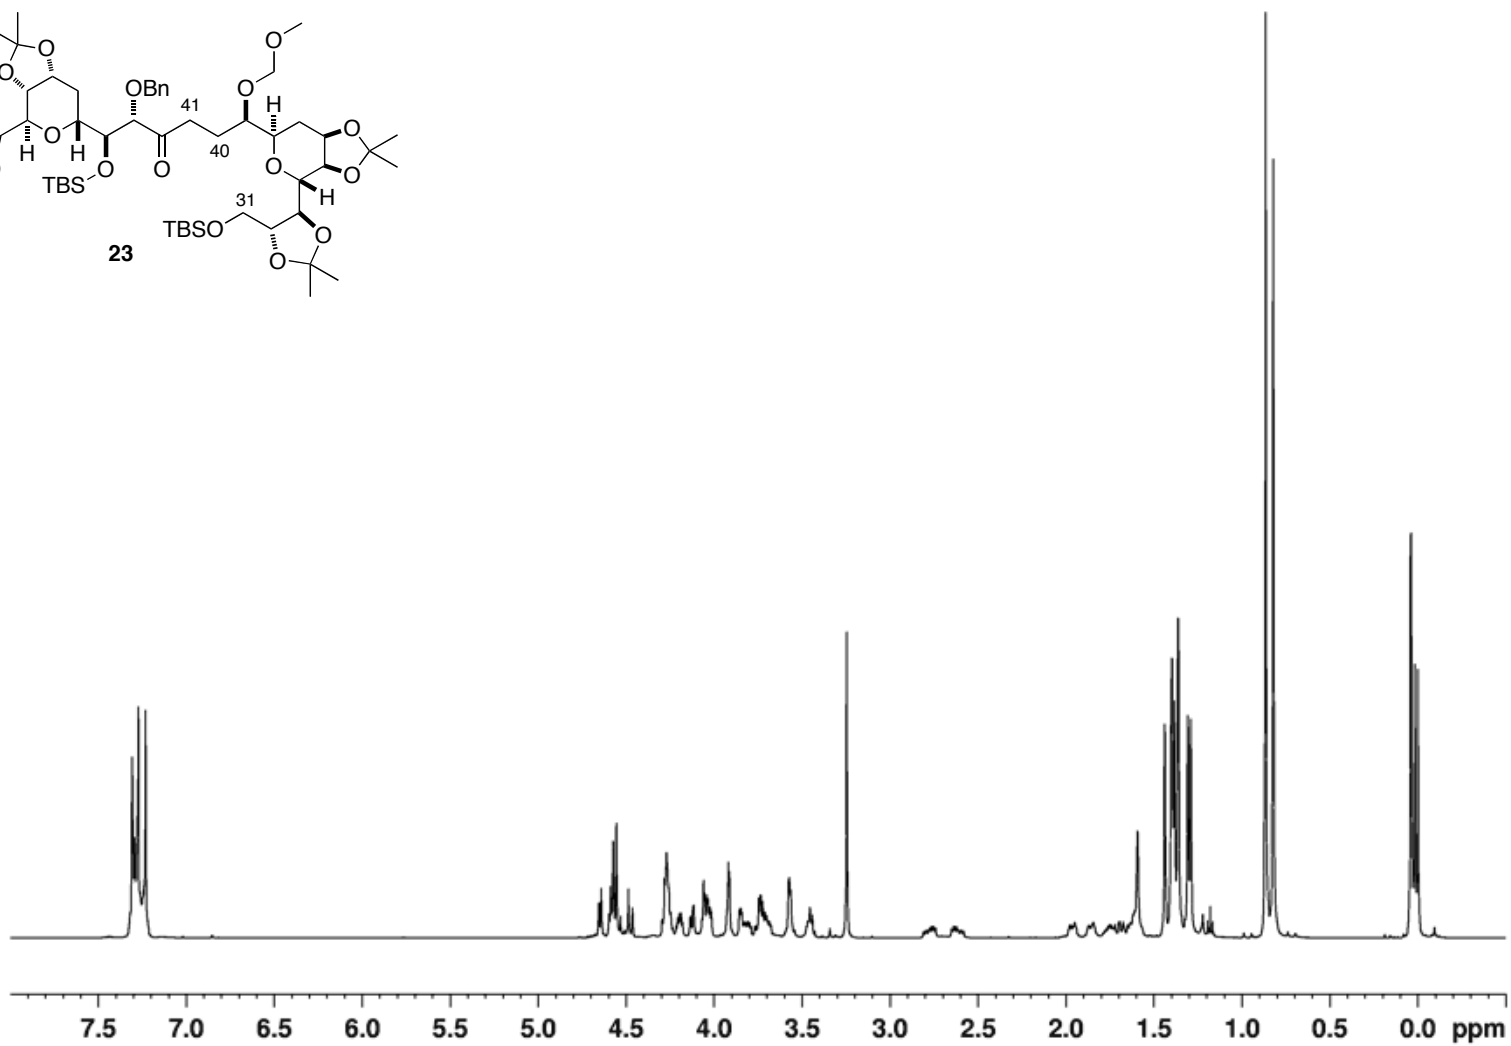

$^{13}\text{C}$  NMR (125 MHz) of ketone **23** (in  $\text{CDCl}_3$ )

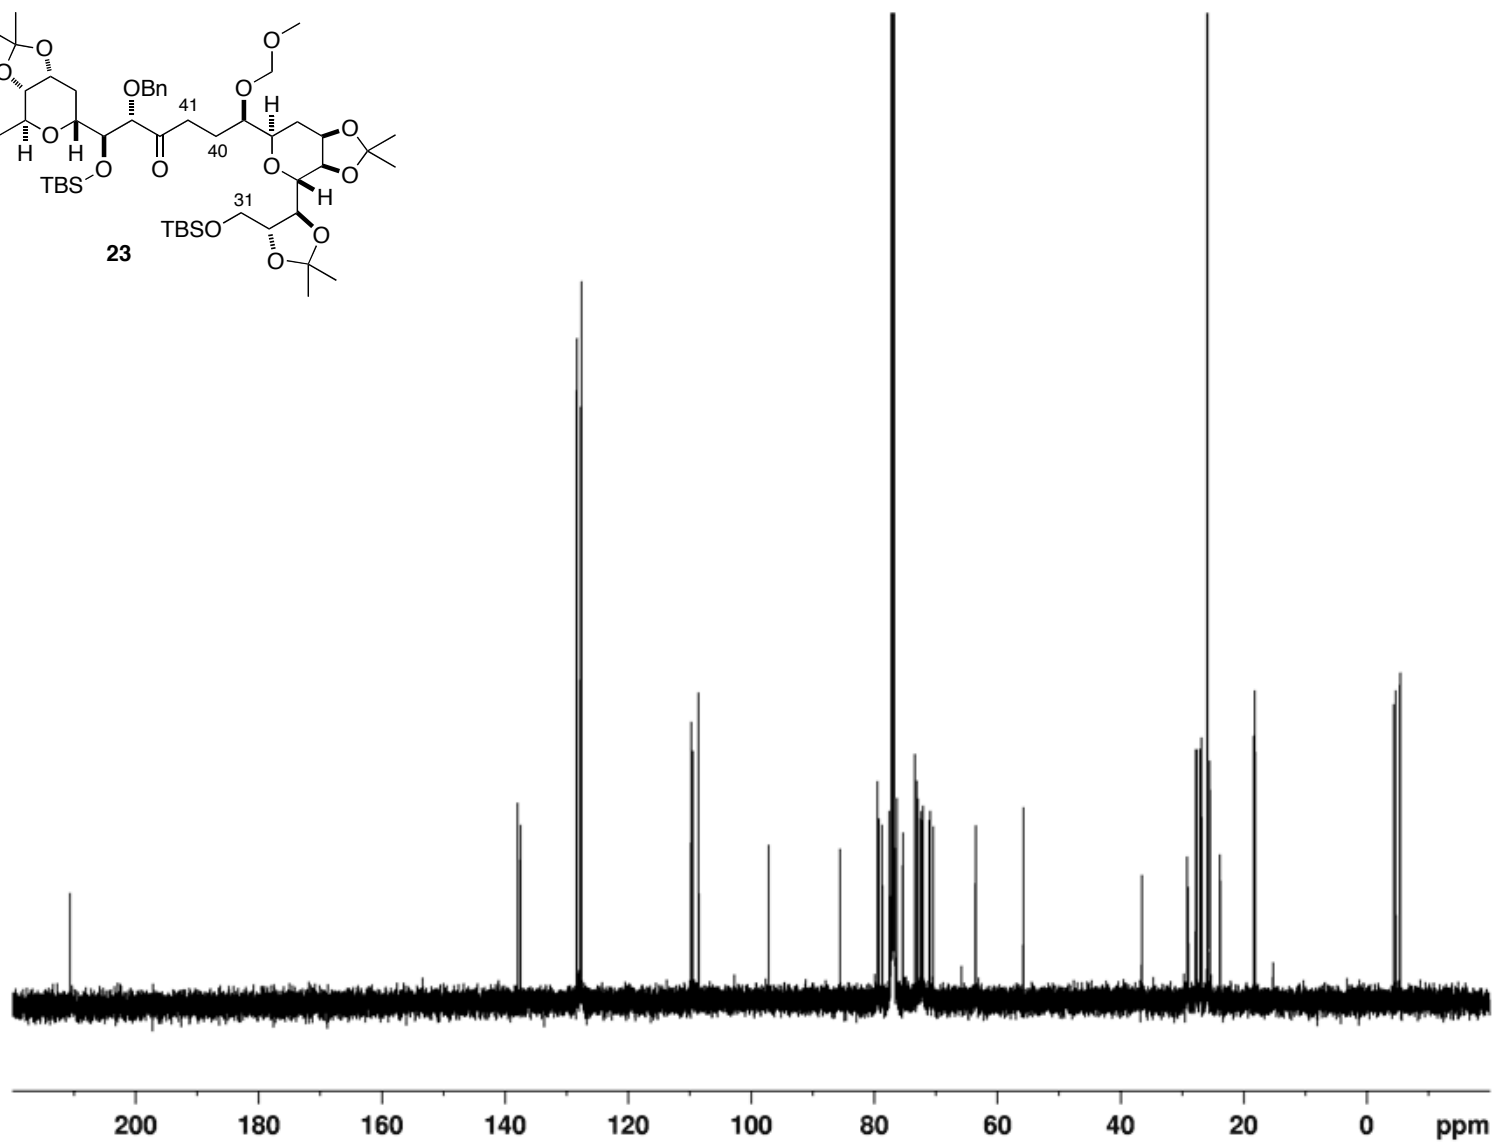

$^1\text{H}$  NMR (500 MHz) of bis-THP core **2** (in  $\text{CDCl}_3$ )

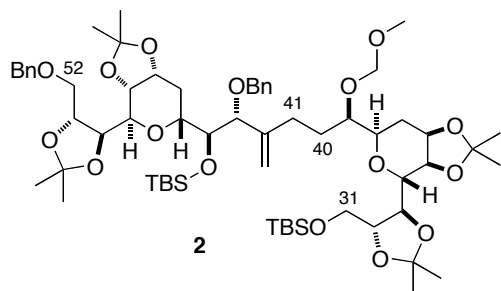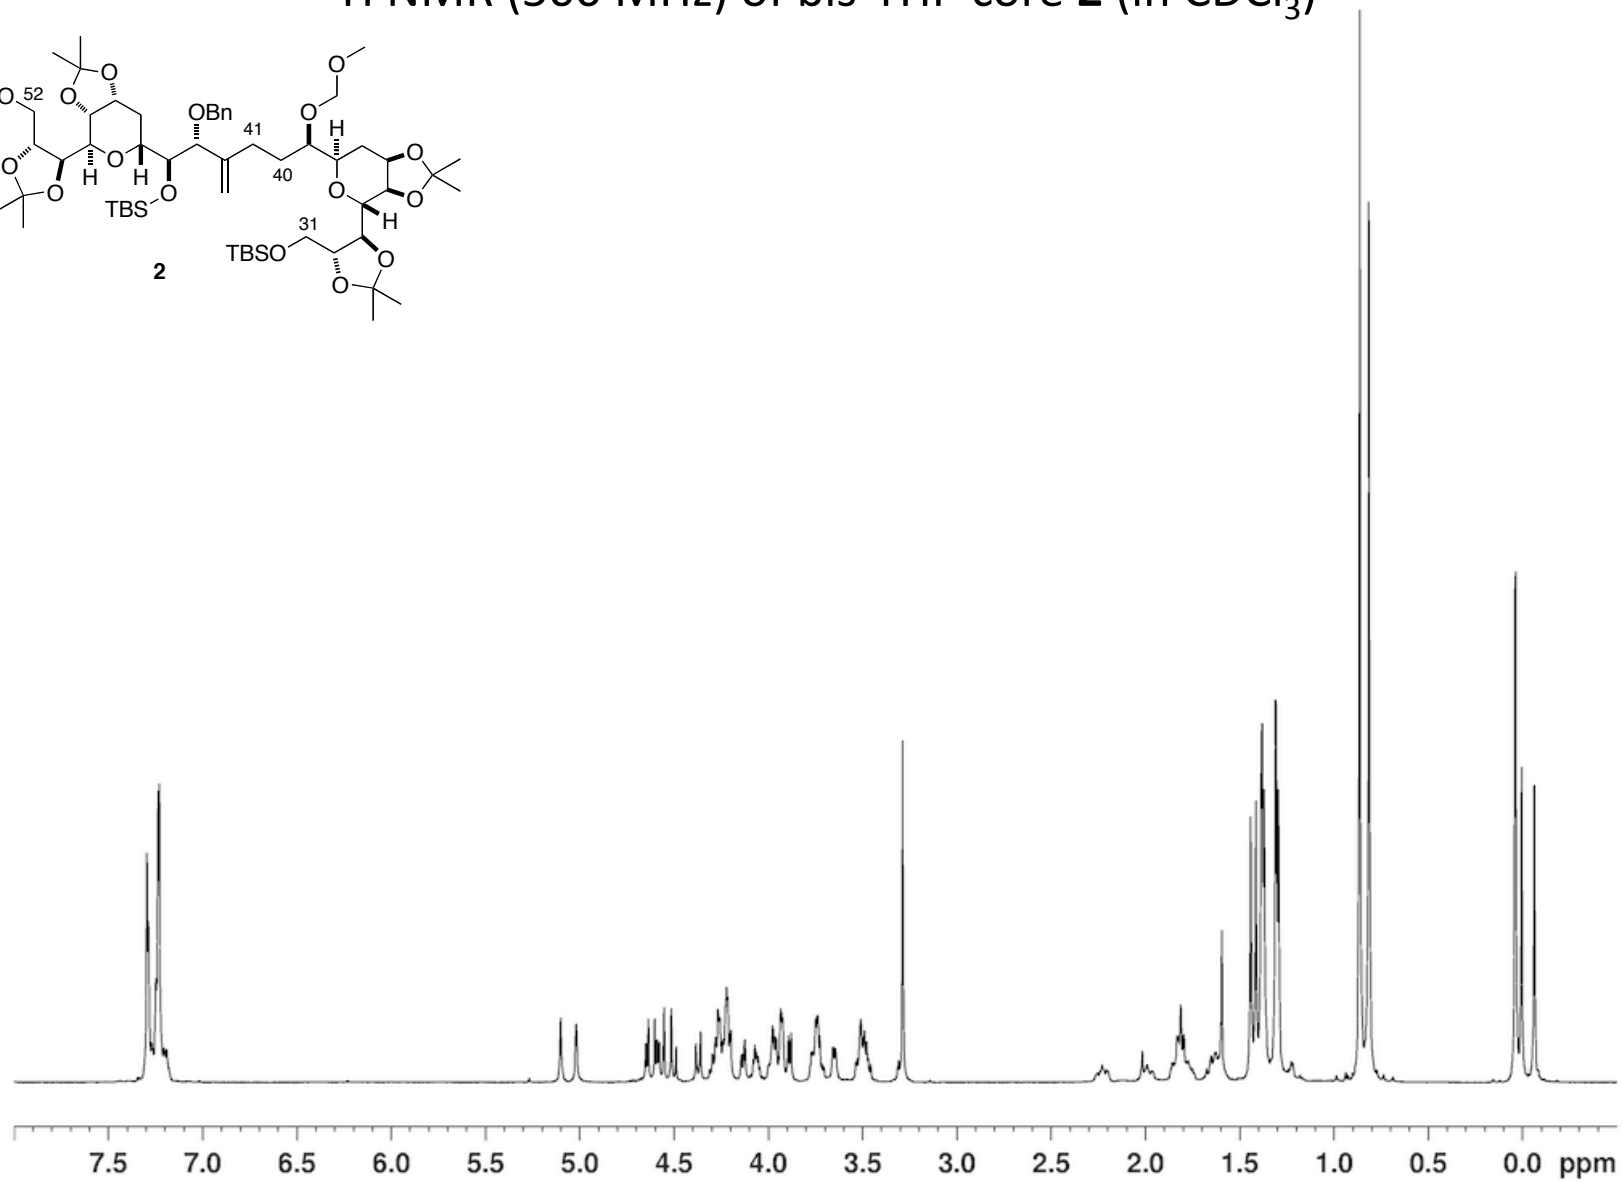



$^{13}\text{C}$  NMR (125 MHz) of bis-THP core **2** (in  $\text{CDCl}_3$ )

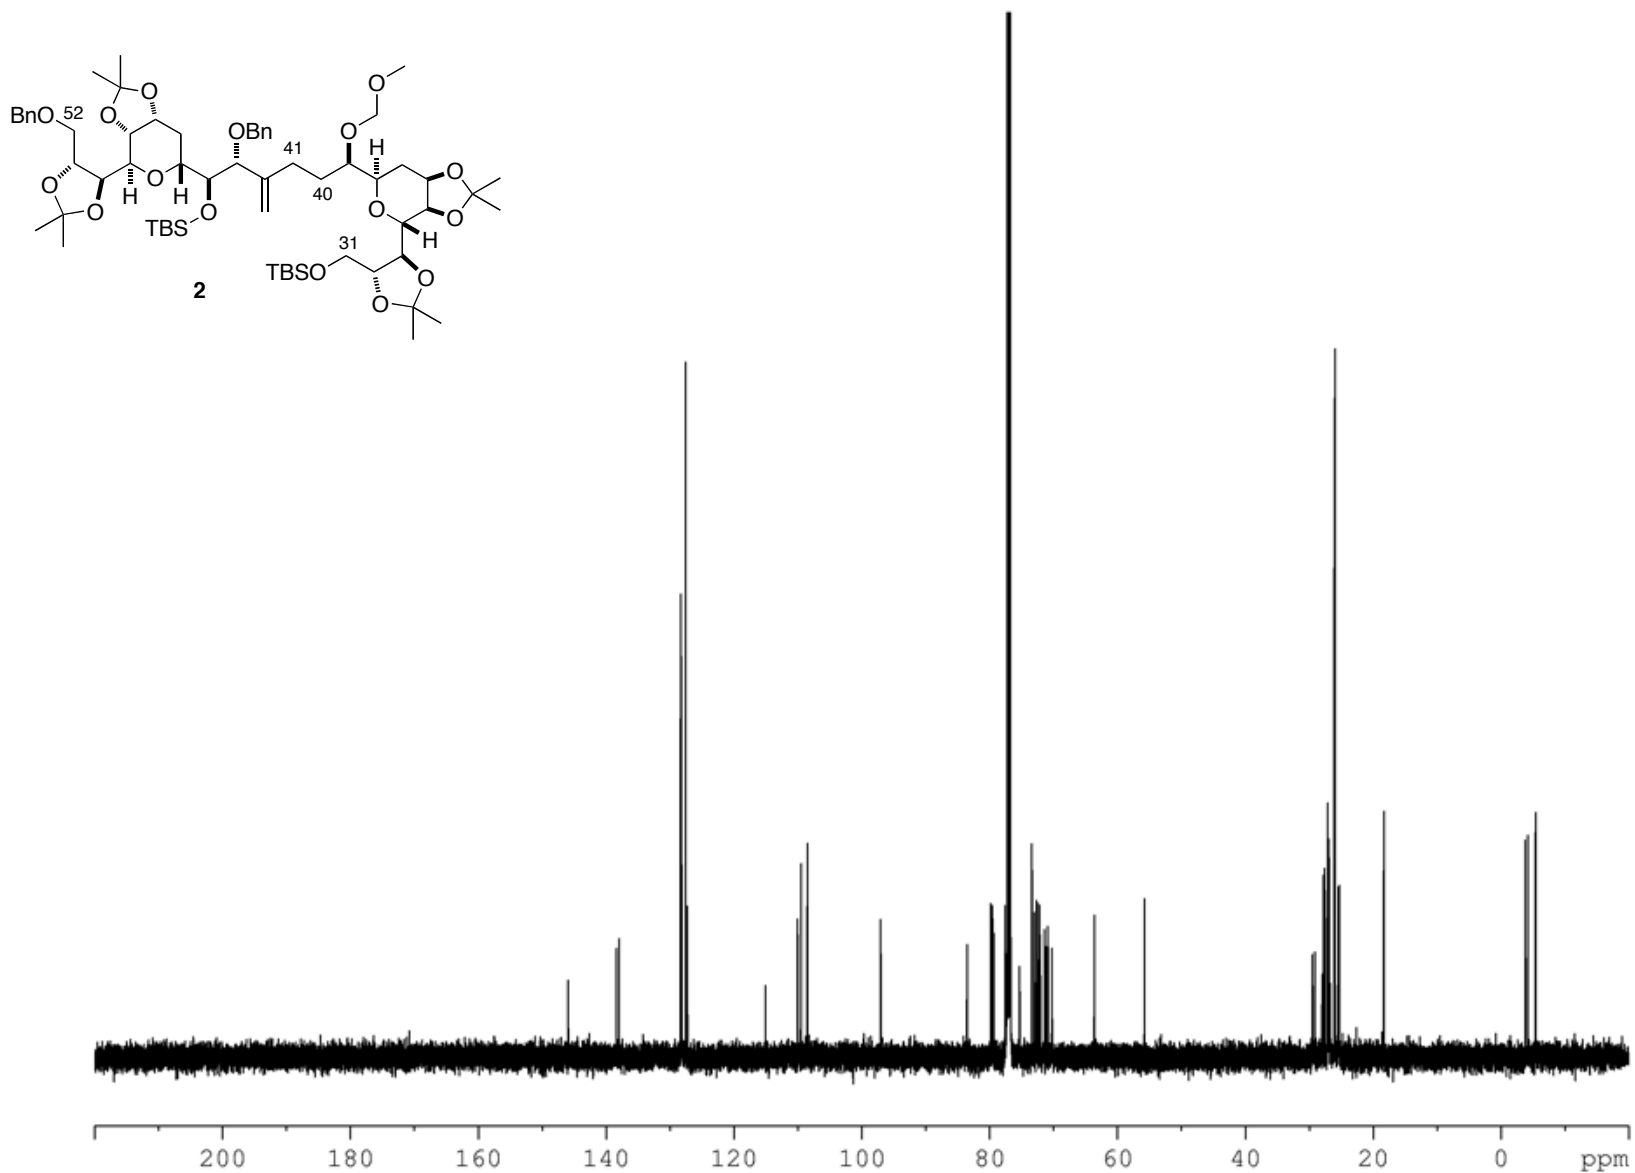

Supplement: NIHMS228610-supplement-2_si_002.pdf [file NIHMS228610-supplement-2_si_002.pdf]
